# Supplementary material for: A DFT mechanistic study on nickel-catalyzed arylation of amino alcohols with aryl electrophiles: insights into the origins of chemoselectivity
Source: Royal Society of Chemistry journal article supplement (doi:10.1039/d4cy01460j), 2025-01-01
Supplement: d4cy01460j1.pdf [file d4cy01460j1.pdf]

***Electronic supplementary information (ESI)***

A DFT mechanistic study on nickel-catalyzed arylation of amino alcohols with aryl  
electrophiles: insights into the origins of chemoselectivity

Chao Shan,<sup>\*a</sup> Zhiqiang Zhang,<sup>a</sup> Junyan You,<sup>a</sup> Ranran Li<sup>\*a</sup> and Xuexiang Ma<sup>\*ab</sup>

<sup>a</sup> Heze University, Heze, Shandong Province, 274015, P. R. China

<sup>b</sup> School of Chemistry and Chemical Engineering, Shandong University, Jinan,  
Shandong Province, 250100, P. R. China

Corresponding author:

E-mail: shanchao1996@163.com, liranran1994@126.com,

maxuexiang\_hezeu@163.com

## Table of Contents

|                                                                                                         |    |
|---------------------------------------------------------------------------------------------------------|----|
| 1. Free energy changes for activation of alcohols or amines.....                                        | S1 |
| 2. Free energy profiles of Ni-catalyzed competitive arylation of an alkyl alcohol and other amines..... | S1 |
| 3. Free energy profiles for stereoisomers of intermediates and transition states.....                   | S3 |
| 4. The formation of the intermediate <b>24</b> .....                                                    | S6 |
| 5. Cartesian coordinates of all the structure.....                                                      | S6 |

## 1. Free energy changes for activation of alcohols or amines.

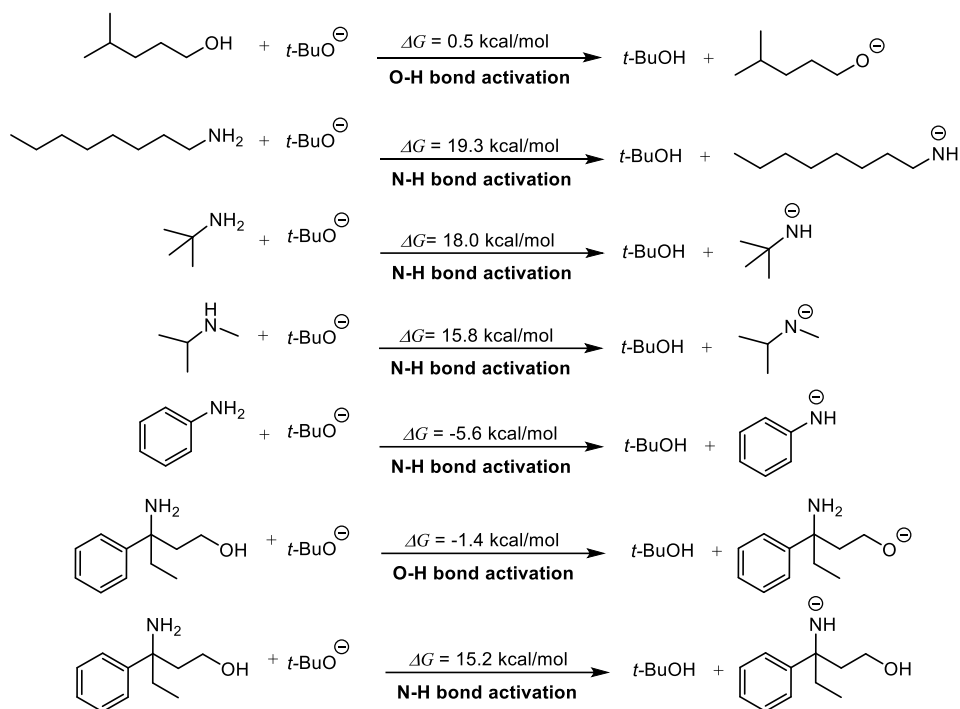

Fig. S1 Free energy changes for activation of alcohols or amines.

## 2. Free energy profiles of Ni-catalyzed competitive arylation of an alkyl alcohol and other amines.

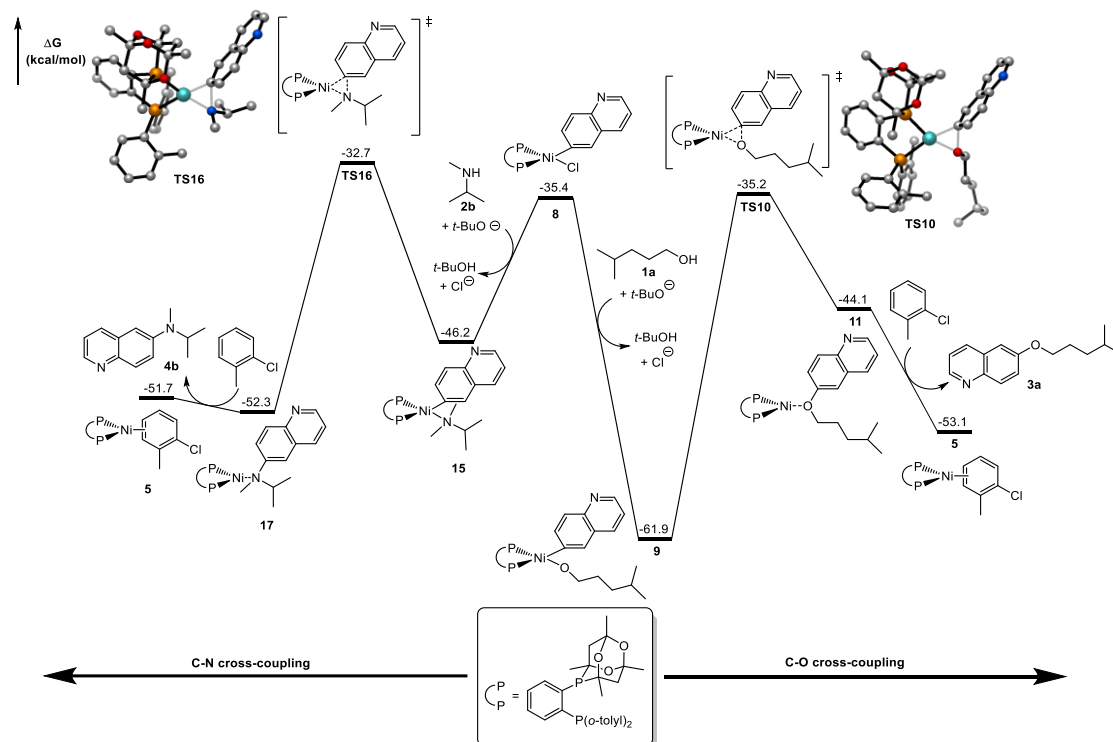

Fig. S2 Free energy profiles of Ni-catalyzed competitive arylation of the alkyl alcohol and secondary dialkylamine from **8**.

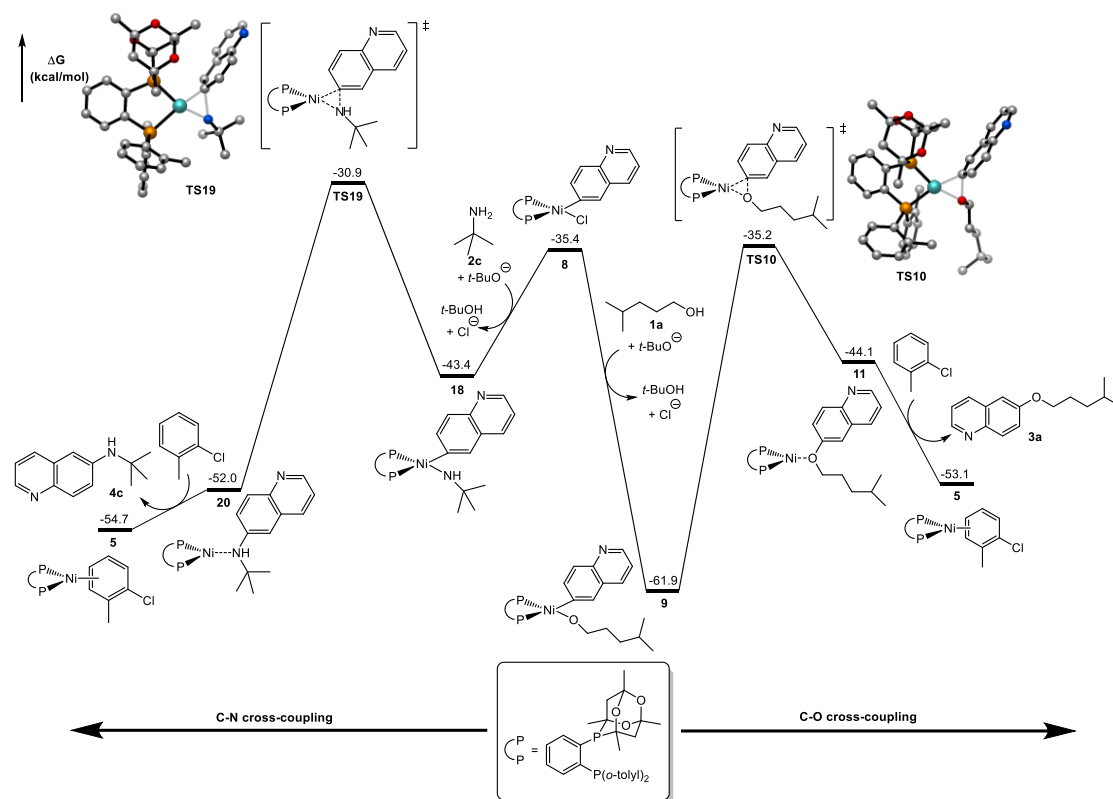

**Fig. S3** Free energy profiles of Ni-catalyzed competitive arylation of the alkyl alcohol and branched primary alkylamine from **8**.

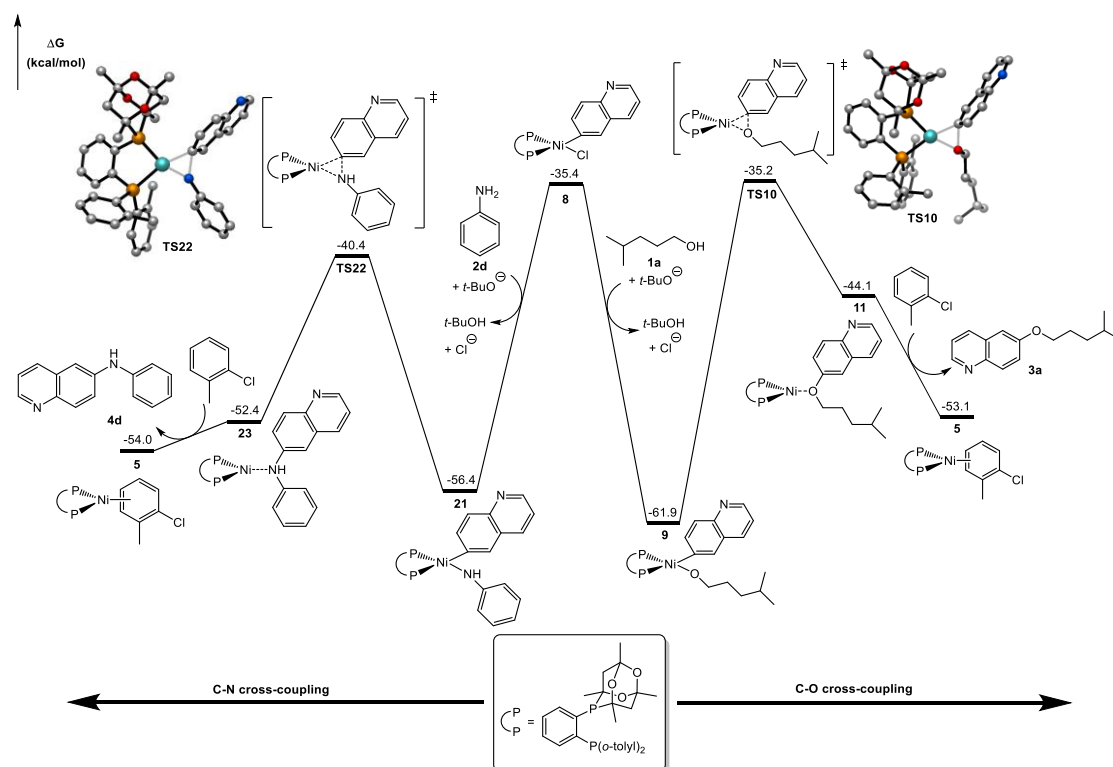

**Fig. S4** Free energy profiles of Ni-catalyzed competitive arylation of the alkyl alcohol and aniline from **8**.

### 3. Free energy profiles for stereoisomers of intermediates and transition states.

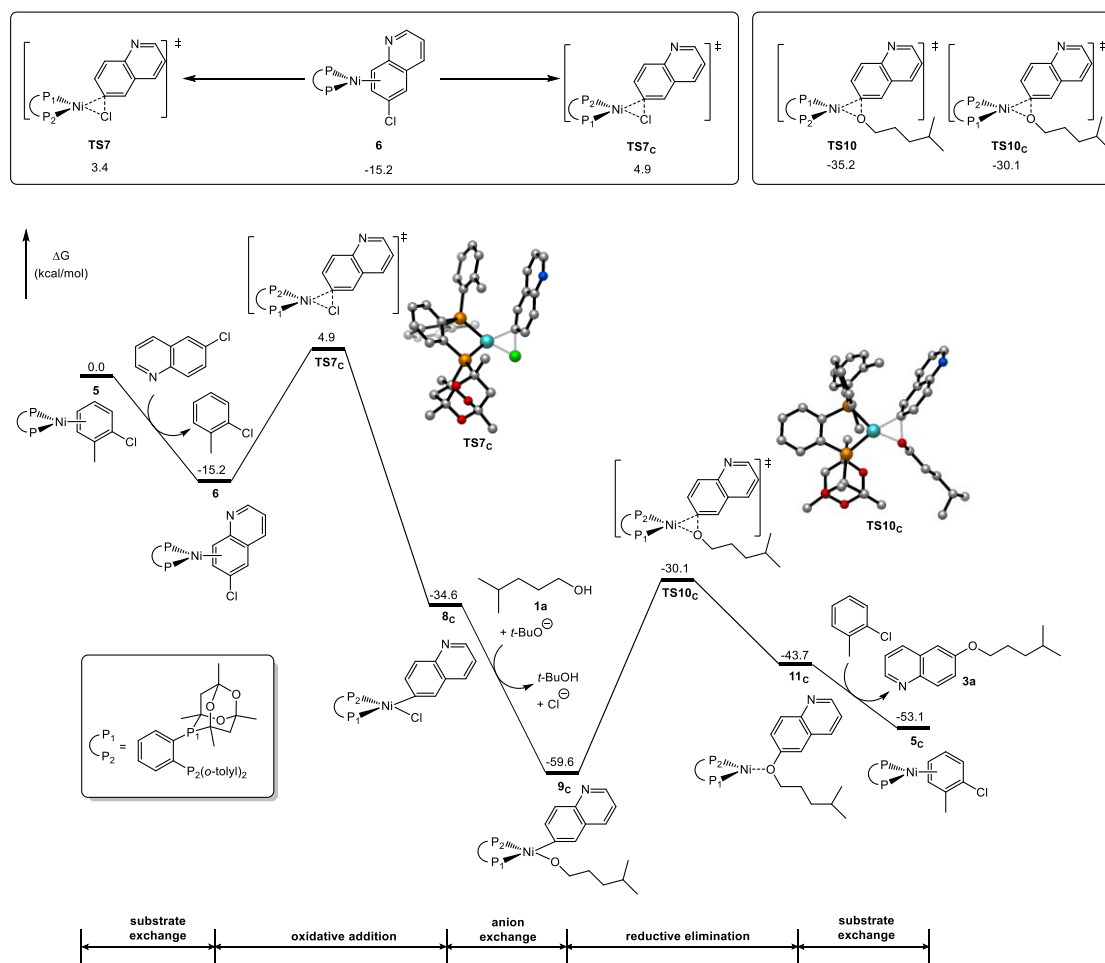

**Fig. S5** Free energy profile of Ni-catalyzed C-O cross-coupling of an alcohol and heteroaryl chloride.

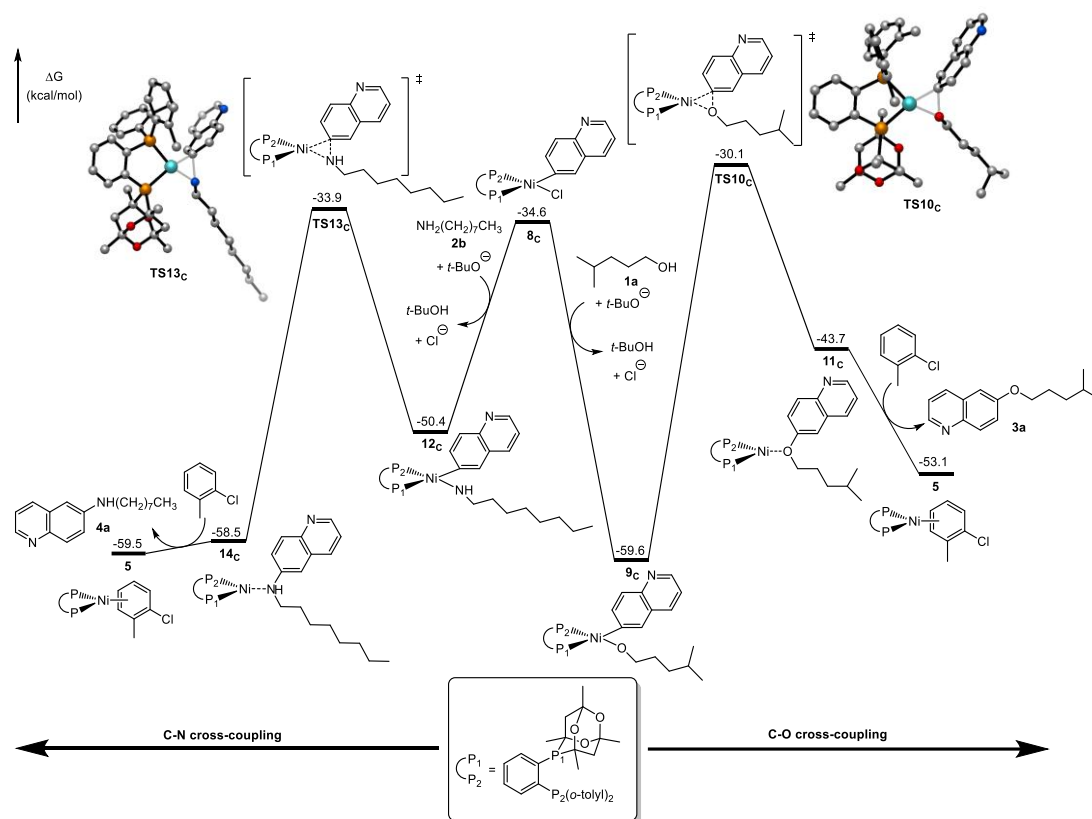

**Fig. S6** Free energy profiles of Ni-catalyzed competitive arylation of the alkyl alcohol and linear alkylamine from **8c**.

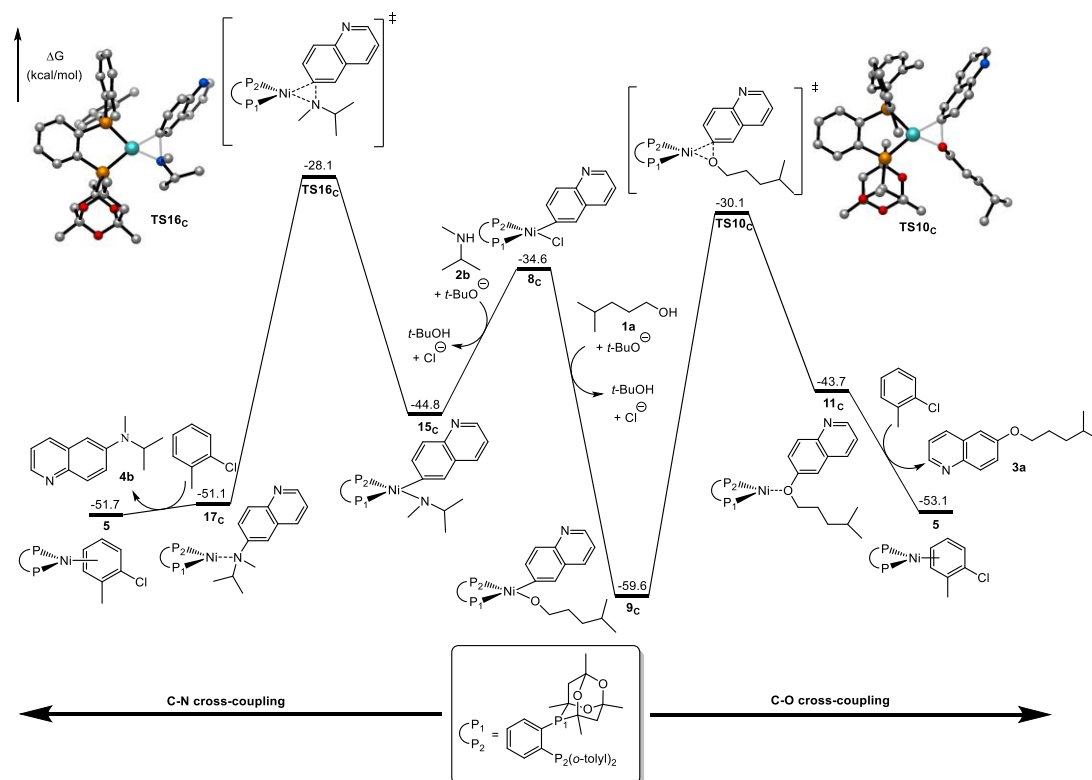

**Fig. S7** Free energy profiles of Ni-catalyzed competitive arylation of the alkyl alcohol and secondary dialkylamine from **8c**.

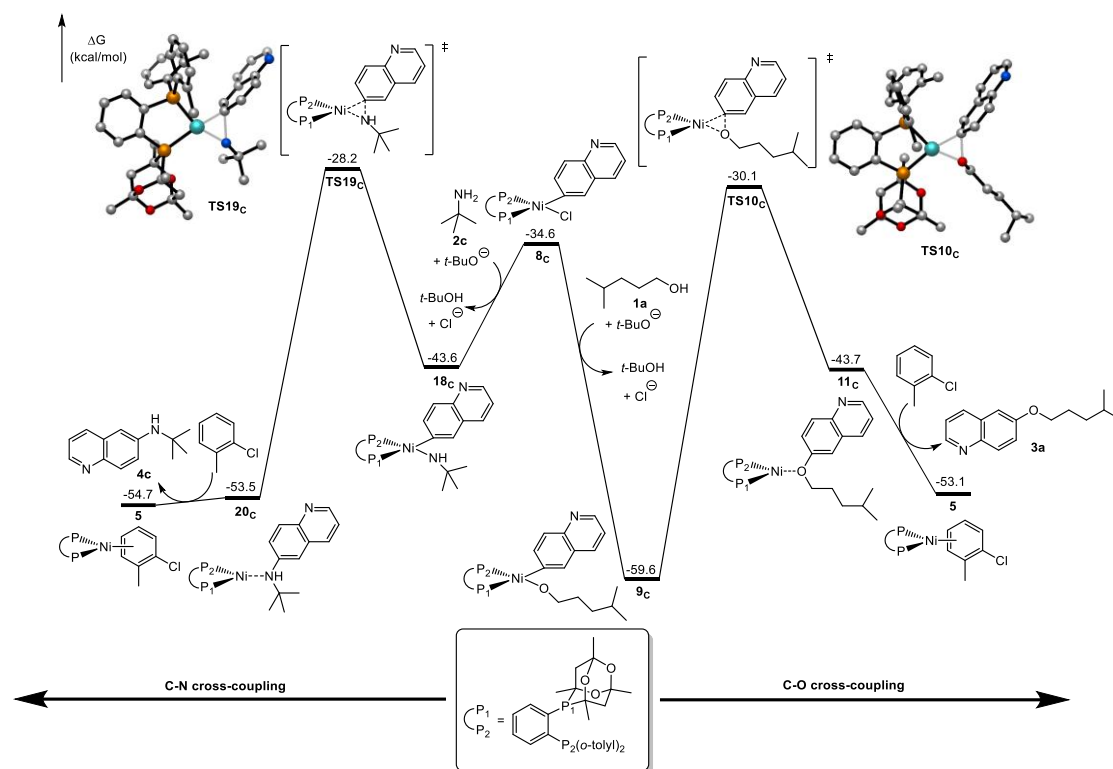

**Fig. S8** Free energy profiles of Ni-catalyzed competitive arylation of the alkyl alcohol and branched primary alkylamine from **8c**.

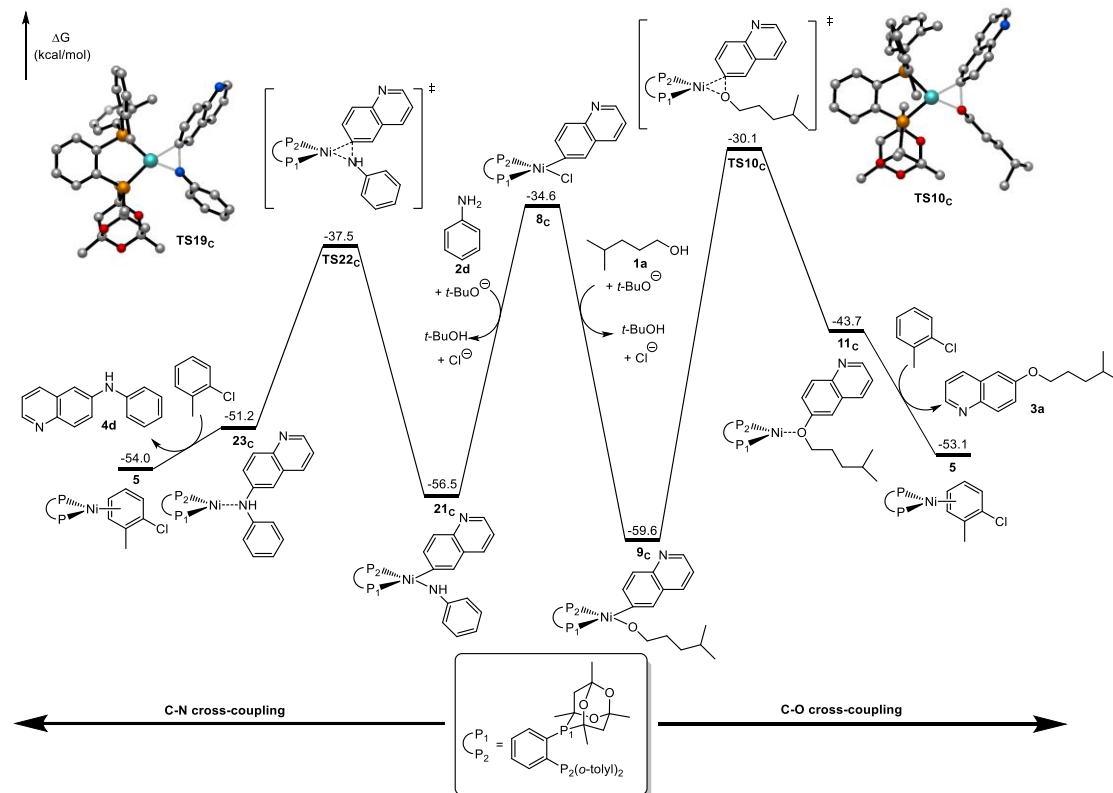

**Fig. S9** Free energy profiles of Ni-catalyzed competitive arylation of the alkyl alcohol and aniline from **8c**.

#### 4. The formation of the intermediate 24.

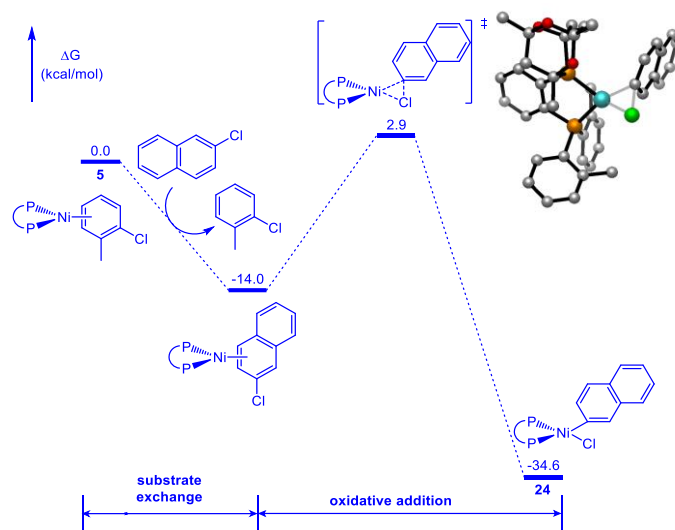

Fig. S10 Free energy profile for the formation of the intermediate 24.

#### 5. Cartesian coordinates of all the structures.

##### 5-Chloroquinoline

|    |             |             |             |
|----|-------------|-------------|-------------|
| C  | -3.24415300 | 0.29002100  | 0.00000900  |
| C  | -1.00251500 | 0.78251400  | 0.00000300  |
| C  | -0.64467000 | -0.60278200 | 0.00000100  |
| C  | -1.69885800 | -1.55124000 | 0.00000100  |
| C  | -2.99881000 | -1.10685900 | 0.00000300  |
| H  | -0.26178900 | 2.80078300  | 0.00000200  |
| H  | -4.27090100 | 0.65316500  | 0.00000500  |
| C  | 0.02994100  | 1.75632400  | 0.00000200  |
| C  | 0.72394800  | -0.97309200 | -0.00000100 |
| H  | -1.46435200 | -2.61214600 | -0.00000100 |
| H  | -3.83285400 | -1.80078700 | 0.00000100  |
| C  | 1.68825400  | 0.00645100  | -0.00000200 |
| C  | 1.35294800  | 1.38187400  | -0.00000100 |
| H  | 1.00093700  | -2.02190700 | -0.00000300 |
| H  | 2.14466700  | 2.12221900  | -0.00000300 |
| N  | -2.29873700 | 1.20798500  | 0.00000500  |
| Cl | 3.38464300  | -0.44097000 | -0.00000600 |

##### *o*-Chlorotoluene

|   |             |             |             |
|---|-------------|-------------|-------------|
| C | -1.88703200 | -1.24539700 | 0.00000200  |
| C | -0.51131500 | -1.47113900 | -0.00000400 |
| C | 0.35906400  | -0.38332800 | -0.00000600 |
| C | -0.09667100 | 0.94302500  | -0.00000600 |
| C | -1.48454000 | 1.13365600  | 0.00000100  |
| C | -2.37461100 | 0.06074000  | 0.00000200  |
| H | -2.56933200 | -2.08955500 | 0.00000700  |



|    |             |             |             |
|----|-------------|-------------|-------------|
| H  | -0.10997700 | -2.47812300 | -0.00000600 |
| H  | -1.86608500 | 2.15085800  | 0.00000300  |
| H  | -3.44416900 | 0.24537200  | 0.00000400  |
| Cl | 2.09142900  | -0.70450200 | 0.00000300  |
| C  | 0.85004700  | 2.11283600  | 0.00000000  |
| H  | 1.50340600  | 2.09473800  | 0.87873600  |
| H  | 1.50346600  | 2.09470100  | -0.87868800 |
| H  | 0.29874400  | 3.05618700  | -0.00003700 |

***t*-BuO<sup>-</sup>**

|   |             |             |             |
|---|-------------|-------------|-------------|
| C | -0.00011700 | -0.00015100 | 0.16276200  |
| C | 0.72803300  | 1.26568800  | -0.43672600 |
| H | 1.75829900  | 1.28482200  | -0.05729800 |
| H | 0.76185000  | 1.32124400  | -1.53965800 |
| H | 0.22538700  | 2.16621500  | -0.05974800 |
| C | 0.73238400  | -1.26254900 | -0.43814500 |
| H | 1.76241700  | -1.27936500 | -0.05800400 |
| H | 0.23227100  | -2.16494700 | -0.06227300 |
| H | 0.76650800  | -1.31641900 | -1.54113800 |
| C | -1.45973100 | -0.00219000 | -0.43836300 |
| H | -1.98863800 | -0.88773600 | -0.06185500 |
| H | -1.99173200 | 0.88039300  | -0.05911300 |
| O | -0.00081200 | -0.00104800 | 1.48540900  |
| H | -1.52327300 | -0.00060900 | -1.54135700 |

***t*-BuOH**

|   |             |             |             |
|---|-------------|-------------|-------------|
| C | 0.00539000  | -0.00000100 | 0.01573700  |
| C | -0.68815600 | -1.26273900 | -0.51151700 |
| H | -1.74599500 | -1.27388800 | -0.22165300 |
| H | -0.64354000 | -1.31709200 | -1.60422700 |
| H | -0.21111800 | -2.15568000 | -0.09787100 |
| C | -0.68798000 | 1.26283400  | -0.51151500 |
| H | -1.74581600 | 1.27413400  | -0.22164300 |
| H | -0.21081100 | 2.15570800  | -0.09787500 |
| H | -0.64336300 | 1.31717800  | -1.60422500 |
| C | 1.48900200  | -0.00010100 | -0.35402200 |
| H | 1.98035600  | 0.88586400  | 0.05831000  |
| H | 1.98023600  | -0.88613600 | 0.05830200  |
| O | -0.01798900 | -0.00000100 | 1.45170800  |
| H | -0.94499500 | 0.00007000  | 1.72539800  |
| H | 1.61941200  | -0.00010600 | -1.44028300 |

**Cl<sup>-</sup>**

|    |    |    |    |
|----|----|----|----|
| Cl | 0. | 0. | 0. |
|----|----|----|----|

**1a**

|   |             |             |             |
|---|-------------|-------------|-------------|
| C | -2.24276300 | -0.48198900 | 0.22724400  |
| H | -2.22452600 | -0.63971700 | 1.31872400  |
| H | -2.30013200 | -1.47825200 | -0.24224400 |
| C | -0.96223400 | 0.21532400  | -0.20781800 |
| H | -0.99717800 | 0.35969100  | -1.29506000 |
| H | -0.95158900 | 1.21406200  | 0.24167000  |
| C | 0.29337800  | -0.57094400 | 0.17900800  |
| H | 0.35338900  | -0.65309800 | 1.27435600  |
| H | 0.20120400  | -1.59915600 | -0.19793500 |
| C | 1.61181900  | 0.02367100  | -0.34543700 |
| H | 1.52837800  | 0.10236000  | -1.43966600 |
| C | 2.78425900  | -0.91199000 | -0.02612400 |
| H | 2.90719200  | -1.02371700 | 1.05806900  |
| H | 2.62535400  | -1.91044700 | -0.44752500 |
| O | -3.34188000 | 0.33466300  | -0.15816400 |
| C | 1.87707900  | 1.42840800  | 0.21126300  |
| H | 1.09262600  | 2.13640100  | -0.07036600 |
| H | 1.93084000  | 1.40590100  | 1.30680500  |
| H | 2.82904600  | 1.82293100  | -0.15941400 |
| H | 3.72537700  | -0.52192900 | -0.42782700 |
| H | -4.15417100 | -0.10721700 | 0.11690700  |

**1b**

|   |             |             |             |
|---|-------------|-------------|-------------|
| C | 2.58705400  | -1.61540000 | 0.52258500  |
| C | 1.24782700  | -1.24326300 | 0.37626000  |
| C | 0.89458500  | -0.01165800 | -0.18862000 |
| C | 1.93676900  | 0.83635100  | -0.59785000 |
| C | 3.27271600  | 0.47399600  | -0.45085300 |
| C | 3.60608700  | -0.76006600 | 0.11166000  |
| H | 2.82834800  | -2.57949700 | 0.96093800  |
| H | 0.47977700  | -1.93157000 | 0.70732600  |
| H | 1.70424400  | 1.79987900  | -1.04315300 |
| H | 4.05438200  | 1.15424200  | -0.77671300 |
| H | 4.64660900  | -1.04838500 | 0.22605600  |
| C | -0.56525300 | 0.45120200  | -0.37784000 |
| C | -0.82325700 | 1.68822400  | 0.51898600  |
| H | -0.09399300 | 2.46067200  | 0.24528800  |
| H | -1.80656600 | 2.09436000  | 0.26104900  |
| C | -0.73036000 | 1.42488300  | 2.02168100  |
| H | 0.23511600  | 0.98302700  | 2.28614000  |
| H | -0.83938300 | 2.35767400  | 2.58309400  |
| H | -1.51545200 | 0.74273800  | 2.36227900  |

|   |             |             |             |
|---|-------------|-------------|-------------|
| C | -1.55800800 | -0.68701500 | -0.06880800 |
| H | -1.41290500 | -1.05475400 | 0.95048700  |
| H | -1.35200600 | -1.53250900 | -0.73642100 |
| C | -3.02585800 | -0.31882100 | -0.23451800 |
| H | -3.31078700 | 0.45706600  | 0.49291100  |
| H | -3.19022400 | 0.09103200  | -1.23856600 |
| O | -3.77434300 | -1.51362200 | -0.01538600 |
| H | -4.70559700 | -1.30766300 | -0.16016300 |
| N | -0.82754000 | 0.87922100  | -1.77031600 |
| H | -0.26243700 | 1.69413600  | -1.99524900 |
| H | -0.52541900 | 0.14338500  | -2.40609400 |

**2a**

|   |             |             |             |
|---|-------------|-------------|-------------|
| N | 5.03114900  | -0.40765300 | -0.07863200 |
| H | 5.08187700  | -0.99440400 | 0.75174300  |
| C | 3.84886000  | 0.45579500  | 0.00723700  |
| H | 3.82760400  | 1.10279200  | 0.90390300  |
| H | 3.86253100  | 1.13004500  | -0.85858400 |
| C | 2.56959200  | -0.37889200 | -0.03011200 |
| H | 2.58584500  | -1.00100900 | -0.93304900 |
| H | 2.56873800  | -1.07361700 | 0.82283300  |
| C | 1.29547000  | 0.46847300  | 0.00781800  |
| H | 1.29897300  | 1.09768300  | 0.90908000  |
| H | 1.29414400  | 1.16138200  | -0.84530500 |
| C | 0.01234400  | -0.36690300 | -0.01916200 |
| H | 0.01224500  | -1.05954800 | 0.83418800  |
| H | 0.00852300  | -0.99664200 | -0.91966600 |
| C | -1.26448700 | 0.47754400  | 0.01436100  |
| H | -1.26000200 | 1.10748300  | 0.91514000  |
| H | -1.26414700 | 1.17027900  | -0.83895700 |
| C | -2.54739400 | -0.35780800 | -0.01265800 |
| H | -2.54760800 | -1.05178100 | 0.83984300  |
| H | -2.55282100 | -0.98691800 | -0.91404200 |
| C | -3.82569300 | 0.48540800  | 0.02263800  |
| H | -3.81922700 | 1.11251700  | 0.92433300  |
| H | -3.82396900 | 1.17901200  | -0.82891000 |
| C | -5.10148100 | -0.35956900 | -0.00613600 |
| H | -5.99981900 | 0.26547800  | 0.02190400  |
| H | -5.14838600 | -0.97094000 | -0.91442900 |
| H | -5.14190600 | -1.04088100 | 0.85128500  |
| H | 5.87610400  | 0.15835500  | -0.07480700 |

**2b**

|   |             |             |             |
|---|-------------|-------------|-------------|
| C | -0.44213700 | -0.01088100 | -0.32452200 |
|---|-------------|-------------|-------------|

|   |             |             |             |
|---|-------------|-------------|-------------|
| N | 0.73149000  | -0.66707200 | 0.26075400  |
| C | -0.64711700 | 1.44877400  | 0.11655200  |
| H | 0.22031900  | 2.07209700  | -0.11954200 |
| H | -1.51821300 | 1.89162000  | -0.37815600 |
| H | -0.81592800 | 1.50015100  | 1.19944700  |
| C | -1.67949100 | -0.85500400 | -0.01186600 |
| H | -1.53419100 | -1.88495100 | -0.34721100 |
| H | -1.86897200 | -0.87340800 | 1.06895600  |
| H | -2.57131800 | -0.44477000 | -0.49590800 |
| C | 2.01697900  | -0.08870000 | -0.10593100 |
| H | 2.14379200  | -0.15670500 | -1.19257300 |
| H | 2.16407400  | 0.96792500  | 0.17746100  |
| H | 2.82009100  | -0.67190800 | 0.35536000  |
| H | -0.28419600 | -0.02040700 | -1.41269400 |
| H | 0.63470200  | -0.67528100 | 1.27417800  |

**2c**

|   |             |             |             |
|---|-------------|-------------|-------------|
| N | 0.00069400  | 0.15413300  | -1.48443500 |
| H | 0.81479000  | 0.70061400  | -1.76172500 |
| C | -0.00003800 | -0.00511900 | -0.01698900 |
| C | 1.25459800  | -0.80553600 | 0.35695000  |
| H | 2.16318300  | -0.25721000 | 0.08127400  |
| H | 1.29265600  | -0.99352700 | 1.43452300  |
| H | 1.26392800  | -1.76367100 | -0.16955700 |
| C | 0.00353800  | 1.34803800  | 0.72114300  |
| H | 0.89157500  | 1.93265900  | 0.45416900  |
| H | -0.88143000 | 1.93730300  | 0.45417600  |
| H | 0.00318900  | 1.21828800  | 1.80946700  |
| C | -1.25906800 | -0.79885900 | 0.35656600  |
| H | -2.16466700 | -0.24568500 | 0.08078100  |
| H | -1.27339200 | -1.75684700 | -0.17011400 |
| H | -1.29841100 | -0.98681300 | 1.43410300  |
| H | -0.81045900 | 0.70480300  | -1.76206800 |

**2d**

|   |             |             |             |
|---|-------------|-------------|-------------|
| C | 1.17083600  | 1.20235400  | 0.00334200  |
| C | -0.22157500 | 1.20813100  | -0.00525800 |
| C | -0.93839400 | -0.00001300 | -0.01032900 |
| C | -0.22155200 | -1.20812300 | -0.00529700 |
| C | 1.17091300  | -1.20231700 | 0.00335700  |
| C | 1.88044300  | 0.00000000  | 0.00823100  |
| H | 1.70473500  | 2.14847900  | 0.00881500  |
| H | -0.76406800 | 2.15031600  | -0.01248100 |
| H | -0.76389700 | -2.15037100 | -0.01318600 |

|   |             |             |             |
|---|-------------|-------------|-------------|
| H | 1.70468800  | -2.14851700 | 0.00898700  |
| H | 2.96546900  | 0.00013800  | 0.01656500  |
| N | -2.33426700 | -0.00011900 | -0.07647100 |
| H | -2.77553800 | -0.83577100 | 0.28208600  |
| H | -2.77554400 | 0.83636700  | 0.28022900  |

**3a**

|   |             |             |             |
|---|-------------|-------------|-------------|
| C | 0.79111700  | 0.79829900  | 0.11410000  |
| C | 1.37148300  | -0.45181700 | 0.02836800  |
| C | 1.60382700  | 1.96683700  | 0.14858900  |
| C | 2.96913800  | 1.86938500  | 0.09554000  |
| H | 1.10312300  | 2.92680800  | 0.21653300  |
| C | 3.60479900  | 0.60003500  | 0.00585300  |
| H | 0.77276100  | -1.35446900 | 0.00221900  |
| C | 2.78532100  | -0.57156000 | -0.02690200 |
| C | 5.53731900  | -0.63211300 | -0.12696400 |
| C | 4.82245800  | -1.85368300 | -0.16501500 |
| C | 3.44818700  | -1.82085600 | -0.11490000 |
| H | 6.62567300  | -0.64377900 | -0.16625100 |
| H | 5.36140900  | -2.79326300 | -0.23267300 |
| H | 2.86241400  | -2.73610100 | -0.14171600 |
| H | 3.60289700  | 2.74926900  | 0.11962000  |
| N | 4.96519500  | 0.55389200  | -0.04483600 |
| C | -1.43514900 | -0.07446000 | 0.11834800  |
| H | -1.26784900 | -0.64005400 | -0.80982200 |
| H | -1.23679800 | -0.75104900 | 0.96214500  |
| C | -2.85567300 | 0.46248300  | 0.17452600  |
| H | -2.98579500 | 1.01928900  | 1.11046000  |
| H | -2.98101700 | 1.18149800  | -0.64153300 |
| C | -3.89604500 | -0.65746000 | 0.07879700  |
| H | -3.79564400 | -1.17094300 | -0.88854800 |
| H | -3.68232700 | -1.41226200 | 0.84818400  |
| C | -5.35276600 | -0.19035300 | 0.24345800  |
| H | -5.42936600 | 0.32209100  | 1.21388300  |
| C | -6.29876400 | -1.39722900 | 0.26851800  |
| H | -6.25703000 | -1.94255500 | -0.68206500 |
| H | -6.03183800 | -2.09789900 | 1.06690000  |
| O | -0.54614700 | 1.03892200  | 0.17108300  |
| C | -5.77152500 | 0.80026400  | -0.85073700 |
| H | -5.16669500 | 1.71139300  | -0.83602400 |
| H | -5.66876200 | 0.34542600  | -1.84372800 |
| H | -6.81844900 | 1.09640300  | -0.72838500 |
| H | -7.33623900 | -1.08505300 | 0.42651400  |

**3b**

|   |             |             |             |
|---|-------------|-------------|-------------|
| C | 2.04782600  | 0.84357000  | 0.27177100  |
| C | 2.69824000  | -0.27730500 | -0.20318300 |
| C | 2.79335100  | 1.95993600  | 0.74205800  |
| C | 4.16306400  | 1.93226300  | 0.72834400  |
| H | 2.24256000  | 2.82054900  | 1.10617600  |
| C | 4.87173100  | 0.79617800  | 0.24803800  |
| H | 2.14831600  | -1.13656200 | -0.56778200 |
| C | 4.11893200  | -0.32526300 | -0.22473100 |
| C | 6.94258900  | -0.37676900 | -0.24884700 |
| C | 6.20012600  | -1.48651000 | -0.71652900 |
| C | 4.82291400  | -1.46073300 | -0.70460000 |
| H | 8.02766300  | -0.40904700 | -0.26347800 |
| H | 6.72233400  | -2.36368600 | -1.08715300 |
| H | 4.25432800  | -2.31423000 | -1.06450100 |
| H | 4.72775400  | 2.78790300  | 1.08846000  |
| C | -0.12211500 | -0.08116500 | -0.10790700 |
| H | 0.09055200  | -0.28845500 | -1.16515300 |
| H | 0.11428500  | -0.98426600 | 0.47064800  |
| C | -1.56822500 | 0.35332900  | 0.07786200  |
| H | -1.72229900 | 0.63231600  | 1.12405300  |
| H | -1.72700000 | 1.25331500  | -0.51971400 |
| C | -2.61605400 | -0.71191100 | -0.33366100 |
| O | 0.69623600  | 0.99640100  | 0.34042700  |
| C | -4.01416400 | -0.08441200 | -0.22384400 |
| C | -4.32227700 | 1.00594900  | -1.05377900 |
| C | -5.01329200 | -0.55942800 | 0.63272200  |
| C | -5.57451400 | 1.61292200  | -1.01163300 |
| H | -3.57419800 | 1.35828800  | -1.75508800 |
| C | -6.27076600 | 0.04873900  | 0.67925200  |
| H | -4.83041500 | -1.41470600 | 1.27060100  |
| C | -6.55586000 | 1.13966300  | -0.13779200 |
| H | -5.78661800 | 2.45385800  | -1.66552100 |
| H | -7.02677300 | -0.33892200 | 1.35589100  |
| H | -7.53274600 | 1.61244800  | -0.10119900 |
| C | -2.45913200 | -1.99978600 | 0.52032300  |
| H | -1.58101000 | -2.53740200 | 0.14108600  |
| H | -3.31192400 | -2.65498800 | 0.30675300  |
| C | -2.29299200 | -1.82090500 | 2.03562800  |
| H | -2.32949900 | -2.79123900 | 2.54082900  |
| H | -1.33140600 | -1.36155000 | 2.28194300  |
| H | -3.07266900 | -1.18913700 | 2.46806000  |
| N | -2.42005500 | -1.00650900 | -1.77417600 |
| H | -1.59484300 | -1.58960700 | -1.89748300 |

|   |             |             |             |
|---|-------------|-------------|-------------|
| H | -3.20852000 | -1.55545800 | -2.10965200 |
| C | 6.28775800  | 0.73962800  | 0.22284600  |
| H | 6.84979600  | 1.59698800  | 0.58401300  |

**4a**

|   |             |             |             |
|---|-------------|-------------|-------------|
| C | -2.16826600 | -0.93458700 | -0.07110000 |
| C | -2.63445600 | 0.37233400  | -0.10251500 |
| C | -3.11484000 | -2.00183300 | 0.03313300  |
| C | -4.46029600 | -1.75706800 | 0.09854900  |
| H | -2.74422400 | -3.02398400 | 0.05355100  |
| C | -4.96302900 | -0.42753300 | 0.05890100  |
| H | -1.94500000 | 1.20617900  | -0.17240300 |
| C | -4.02314700 | 0.64618900  | -0.04614300 |
| C | -6.75458100 | 1.00702000  | 0.08682300  |
| C | -5.91533600 | 2.14294700  | -0.01466900 |
| C | -4.55352000 | 1.96104600  | -0.08034700 |
| H | -7.83460700 | 1.13739200  | 0.13938900  |
| H | -6.35204600 | 3.13637900  | -0.03958800 |
| H | -3.87652400 | 2.80790600  | -0.15882000 |
| H | -5.17966500 | -2.56503400 | 0.17972500  |
| N | -6.30916600 | -0.23480000 | 0.12374900  |
| C | 0.21197100  | -0.25358600 | -0.02251500 |
| H | 0.10414000  | 0.48320600  | -0.82899800 |
| H | 0.10506300  | 0.30200700  | 0.92553400  |
| C | 1.59917800  | -0.88617900 | -0.10154400 |
| H | 1.70073400  | -1.63759500 | 0.69506000  |
| H | 1.69089700  | -1.42422800 | -1.05332400 |
| C | 2.72459800  | 0.14307600  | 0.02800300  |
| H | 2.61565600  | 0.90051000  | -0.76033100 |
| H | 2.62097700  | 0.67857400  | 0.98169000  |
| C | 4.12235200  | -0.47621300 | -0.05658700 |
| H | 4.23148100  | -1.23729300 | 0.72865200  |
| C | 5.24803700  | 0.55332300  | 0.07512000  |
| H | 5.13351900  | 1.31782800  | -0.70612700 |
| H | 5.14591200  | 1.08196900  | 1.03326800  |
| C | 6.64782600  | -0.05976200 | -0.01870400 |
| H | 6.75031700  | -0.58736000 | -0.97754600 |
| H | 6.76329100  | -0.82537800 | 0.76154200  |
| C | 7.77360400  | 0.97046600  | 0.11346600  |
| H | 7.65529900  | 1.73558400  | -0.66557200 |
| H | 7.67112200  | 1.49577400  | 1.07249800  |
| C | 9.16872700  | 0.34918800  | 0.01468700  |
| H | 9.30767100  | -0.15603200 | -0.94780400 |
| H | 9.95394800  | 1.10585900  | 0.11033500  |

|   |             |             |             |
|---|-------------|-------------|-------------|
| H | 9.32542200  | -0.39573300 | 0.80299600  |
| H | 4.22614400  | -1.00876900 | -1.01212700 |
| N | -0.82479900 | -1.25862300 | -0.17104800 |
| H | -0.58469500 | -2.16677100 | 0.20213800  |

**4b**

|   |             |             |             |
|---|-------------|-------------|-------------|
| C | 0.84402600  | -0.34090100 | -0.43608500 |
| C | -0.08476600 | 0.66867700  | -0.62408000 |
| C | 0.38949300  | -1.60129200 | 0.05366000  |
| C | -0.93505300 | -1.81953500 | 0.35026700  |
| H | 1.10736300  | -2.40012600 | 0.20247900  |
| C | -1.89387700 | -0.78763700 | 0.18920900  |
| H | 0.23439100  | 1.61408100  | -1.04788500 |
| C | -1.45063300 | 0.47980600  | -0.30558000 |
| C | -4.06961800 | -0.07154400 | 0.33559800  |
| C | -3.74002600 | 1.21788900  | -0.15461600 |
| C | -2.43193900 | 1.49041500  | -0.47477700 |
| H | -5.10299600 | -0.29776500 | 0.59567800  |
| H | -4.51745000 | 1.96642800  | -0.26878500 |
| H | -2.13468800 | 2.46493100  | -0.85331600 |
| H | -1.28325600 | -2.77647100 | 0.72474000  |
| N | -3.19659300 | -1.04433100 | 0.50436600  |
| C | 2.99490500  | 0.66268500  | 0.25406800  |
| N | 2.21425200  | -0.10887400 | -0.74704800 |
| C | 3.00833900  | 0.00382800  | 1.64257400  |
| H | 3.35580000  | -1.03276900 | 1.59552900  |
| H | 3.67256900  | 0.54771100  | 2.32166000  |
| H | 2.00359700  | 0.00465700  | 2.07670000  |
| C | 2.55149400  | 2.12360100  | 0.34765000  |
| H | 2.51606100  | 2.58251300  | -0.64425900 |
| H | 1.56452200  | 2.21313600  | 0.80944700  |
| H | 3.25965400  | 2.68494300  | 0.96556300  |
| C | 2.94295000  | -1.26750200 | -1.24905000 |
| H | 3.86495700  | -0.92286800 | -1.72811600 |
| H | 3.22590600  | -2.00752500 | -0.48132400 |
| H | 2.33920400  | -1.77796200 | -2.00329300 |
| H | 4.01897400  | 0.65858400  | -0.13906700 |

**4c**

|   |             |             |             |
|---|-------------|-------------|-------------|
| C | 0.63641600  | -0.70188600 | -0.11971100 |
| C | -0.09334700 | 0.48073900  | -0.11160800 |
| C | -0.08700800 | -1.93859200 | -0.06639700 |
| C | -1.45363400 | -1.97646400 | -0.00808600 |
| H | 0.47891800  | -2.86752700 | -0.07688600 |



|   |             |             |             |
|---|-------------|-------------|-------------|
| C | -2.21583000 | -0.77713500 | 0.00209400  |
| H | 0.39764100  | 1.44320100  | -0.15553900 |
| C | -1.50834300 | 0.46437200  | -0.05195300 |
| C | -4.25788800 | 0.26729400  | 0.06973600  |
| C | -3.66193600 | 1.55085700  | 0.01856000  |
| C | -2.29118900 | 1.64728100  | -0.04173000 |
| H | -5.34218500 | 0.17730800  | 0.11799200  |
| H | -4.28813100 | 2.43747700  | 0.02730300  |
| H | -1.79750500 | 2.61497100  | -0.08223400 |
| H | -1.99188700 | -2.91747500 | 0.03375000  |
| N | -3.57293300 | -0.86099200 | 0.06257900  |
| C | 3.01371900  | 0.25981300  | 0.02901100  |
| C | 4.37727700  | -0.44917200 | 0.02228300  |
| H | 4.43994900  | -1.18516300 | 0.83217000  |
| H | 4.54105000  | -0.96327900 | -0.93018900 |
| N | 2.01500700  | -0.79558300 | -0.21316000 |
| H | 2.36088700  | -1.72365700 | -0.01838600 |
| C | 2.81042400  | 0.94037200  | 1.39634500  |
| H | 2.88294300  | 0.20158600  | 2.20051700  |
| H | 3.57817300  | 1.70319100  | 1.55984900  |
| H | 1.83348900  | 1.42055600  | 1.47325400  |
| C | 3.00012200  | 1.28917600  | -1.11656000 |
| H | 3.15348000  | 0.78375400  | -2.07395100 |
| H | 2.05902400  | 1.83767500  | -1.17660900 |
| H | 3.80291800  | 2.01947200  | -0.97406700 |
| H | 5.18401900  | 0.27401600  | 0.16520000  |

**4d**

|   |             |             |             |
|---|-------------|-------------|-------------|
| C | 0.00066400  | 1.01897200  | -0.01965400 |
| C | 0.51559300  | -0.24892500 | 0.20013900  |
| C | 0.90099000  | 2.09851900  | -0.27192700 |
| C | 2.25661700  | 1.90195400  | -0.30513100 |
| H | 0.48858200  | 3.08879400  | -0.44858100 |
| C | 2.80910000  | 0.60935600  | -0.10038700 |
| H | -0.14194600 | -1.07817500 | 0.43197200  |
| C | 1.91201900  | -0.47571200 | 0.15466000  |
| C | 4.65316100  | -0.74766200 | 0.05147100  |
| C | 3.85854400  | -1.88993200 | 0.31901900  |
| C | 2.49157800  | -1.75276900 | 0.37001900  |
| H | 5.73698600  | -0.84444700 | 0.00633600  |
| H | 4.33408800  | -2.85239100 | 0.47867800  |
| H | 1.84721700  | -2.60424400 | 0.57254700  |
| H | 2.94301800  | 2.71990600  | -0.49581600 |
| N | 4.16181700  | 0.45975200  | -0.15132600 |

|   |             |             |             |
|---|-------------|-------------|-------------|
| N | -1.35823900 | 1.32570400  | 0.01592900  |
| H | -1.57556600 | 2.28583700  | 0.23582300  |
| C | -2.45408900 | 0.45585900  | -0.00870600 |
| C | -3.62909900 | 0.83202600  | 0.66254900  |
| C | -2.44228000 | -0.74749800 | -0.73348200 |
| C | -4.76082000 | 0.02315300  | 0.61549400  |
| H | -3.64411200 | 1.76085000  | 1.22721500  |
| C | -3.57571800 | -1.55690100 | -0.75872500 |
| H | -1.55904600 | -1.03044900 | -1.29301400 |
| C | -4.74063700 | -1.18304100 | -0.08688600 |
| H | -5.65906900 | 0.33371600  | 1.14092600  |
| H | -3.54925800 | -2.48341400 | -1.32490800 |
| H | -5.61969300 | -1.81856700 | -0.11411400 |

**4e**

|   |             |             |             |
|---|-------------|-------------|-------------|
| C | -0.61893700 | -1.05730800 | -0.47338200 |
| C | -1.31024400 | 0.01529100  | 0.06897400  |
| C | -1.36587400 | -2.17978900 | -0.94624100 |
| C | -2.73365000 | -2.21261300 | -0.86719200 |
| H | -0.82724100 | -3.02060900 | -1.37801800 |
| C | -3.46297100 | -1.12921800 | -0.30960900 |
| H | -0.78337700 | 0.89229300  | 0.41861200  |
| C | -2.72448200 | 0.00244700  | 0.16212400  |
| C | -5.54552000 | -0.05882400 | 0.34130200  |
| C | -4.81878000 | 1.06382900  | 0.80642400  |
| C | -3.44503200 | 1.09369300  | 0.71910900  |
| H | -6.62853900 | -0.06965200 | 0.41685700  |
| H | -5.35255800 | 1.90710600  | 1.23518000  |
| H | -2.88871300 | 1.95676300  | 1.07517400  |
| H | -3.27721400 | -3.08055300 | -1.23110900 |
| C | 1.73527900  | -0.35426300 | 0.18325400  |
| C | 3.14836000  | -0.79843600 | -0.27987400 |
| H | 3.25204100  | -0.54815100 | -1.34243900 |
| N | 0.76749800  | -1.10618400 | -0.63916400 |
| H | 1.08420400  | -2.04353000 | -0.84007400 |
| C | 1.52824700  | -0.67529900 | 1.69199900  |
| H | 1.31405000  | -1.74767200 | 1.76190600  |
| H | 0.61511300  | -0.17847400 | 2.03029500  |
| H | 3.89094700  | -0.20092700 | 0.25499300  |
| C | 1.59807300  | 1.14163800  | -0.15520600 |
| C | 1.52591300  | 1.51542500  | -1.50474800 |
| C | 1.53736100  | 2.15076400  | 0.81182800  |
| C | 1.41318500  | 2.85186700  | -1.87729500 |
| H | 1.52083300  | 0.73864600  | -2.26188700 |

|   |             |             |             |
|---|-------------|-------------|-------------|
| C | 1.42320900  | 3.49336900  | 0.44195800  |
| H | 1.55165600  | 1.90452100  | 1.86556800  |
| C | 1.36563600  | 3.85107900  | -0.90292700 |
| H | 1.35017500  | 3.11355700  | -2.92949100 |
| H | 1.37290600  | 4.25693100  | 1.21264800  |
| H | 1.27329900  | 4.89408400  | -1.19010100 |
| C | -4.87641100 | -1.13141900 | -0.20551800 |
| H | -5.42458300 | -1.99797100 | -0.56678200 |
| C | 3.50773400  | -2.27602200 | -0.08885100 |
| C | 2.68853200  | -0.34984800 | 2.64376300  |
| H | 3.04255400  | 0.67884000  | 2.54636700  |
| H | 2.37083100  | -0.49450800 | 3.68113400  |
| H | 3.55015200  | -1.00141300 | 2.47529900  |
| O | 4.86912800  | -2.52472000 | -0.40819000 |
| H | 5.01112100  | -2.24828500 | -1.32304500 |
| H | 2.84859400  | -2.92919900 | -0.68515700 |
| H | 3.39048400  | -2.57892600 | 0.95438000  |

## 5

|    |             |             |             |
|----|-------------|-------------|-------------|
| Ni | 0.19511600  | 1.06737600  | -0.38488100 |
| P  | -1.38733500 | -0.42291000 | -0.32636600 |
| P  | 1.70662200  | -0.47281700 | 0.10324500  |
| C  | -0.57293500 | -2.08510400 | -0.34388000 |
| C  | 0.82468500  | -2.09038400 | -0.14046900 |
| C  | -2.91019000 | -0.60402300 | -1.42940700 |
| C  | -2.42863300 | -0.34229300 | 1.25892700  |
| O  | -3.76544300 | -1.69565300 | -1.02536900 |
| O  | -3.24982800 | 0.83406400  | 1.13589400  |
| C  | 1.52865900  | -3.30158900 | -0.17756400 |
| C  | -1.22641800 | -3.30397200 | -0.59925600 |
| C  | -3.33867000 | -1.56234700 | 1.38759800  |
| C  | -3.69460400 | 0.70270100  | -1.26550600 |
| C  | -2.51702400 | -0.87333500 | -2.87197900 |
| C  | -1.54965100 | -0.11568500 | 2.47390800  |
| H  | 2.60380600  | -3.29732700 | -0.03202700 |
| C  | 0.86613800  | -4.50283900 | -0.41640800 |
| C  | -0.51277700 | -4.50019100 | -0.63510000 |
| H  | -2.29128800 | -3.30347800 | -0.79294800 |
| C  | -4.38047900 | -1.56566900 | 0.25944100  |
| H  | -2.75582200 | -2.48571500 | 1.37877400  |
| H  | -3.87591200 | -1.50174600 | 2.34033900  |
| H  | -4.52386700 | 0.70875600  | -1.98091000 |
| H  | -3.05105100 | 1.56183200  | -1.45658000 |
| C  | -4.27766300 | 0.78751800  | 0.15167300  |

|    |             |             |             |
|----|-------------|-------------|-------------|
| H  | -3.41484800 | -0.94329700 | -3.49408400 |
| H  | -1.96170000 | -1.81083900 | -2.95630300 |
| H  | -1.88623500 | -0.06089400 | -3.24340100 |
| H  | -2.17637500 | 0.00582300  | 3.36358000  |
| H  | -0.94513100 | 0.78415200  | 2.33798100  |
| H  | -0.87841100 | -0.96334800 | 2.62831400  |
| O  | -5.11553800 | -0.35173200 | 0.34269800  |
| H  | 1.42420200  | -5.43401400 | -0.44520900 |
| H  | -1.03416000 | -5.43055700 | -0.84082700 |
| C  | -5.37693200 | -2.70070200 | 0.36419900  |
| C  | -5.13602600 | 2.01345900  | 0.37994900  |
| H  | -6.08579300 | -2.63460600 | -0.46367300 |
| H  | -5.92039400 | -2.63078000 | 1.30885400  |
| H  | -4.85855300 | -3.66157900 | 0.31724500  |
| H  | -5.53928600 | 1.98296600  | 1.39417600  |
| H  | -5.96190200 | 2.03214400  | -0.33447500 |
| H  | -4.53174900 | 2.91502300  | 0.26347600  |
| C  | -0.17280200 | 3.66263500  | 1.75943400  |
| C  | 0.94292500  | 3.31466200  | 1.03423500  |
| C  | 0.83745900  | 2.95816500  | -0.35034700 |
| H  | -0.07283800 | 3.88671600  | 2.81732300  |
| H  | 1.92066100  | 3.30529800  | 1.49849500  |
| Cl | 2.32240100  | 3.24591700  | -1.35840600 |
| C  | -1.43766300 | 3.77521800  | 1.12613300  |
| H  | -2.30394000 | 4.09557400  | 1.69510800  |
| C  | -0.45578200 | 3.00947800  | -0.99547600 |
| C  | -1.55493600 | 3.48073300  | -0.20843900 |
| H  | -2.50761700 | 3.62187100  | -0.71204600 |
| C  | -0.59244600 | 3.03051300  | -2.50372100 |
| H  | -1.61055400 | 2.75888200  | -2.79876100 |
| H  | -0.38728400 | 4.03417800  | -2.89843700 |
| H  | 0.09896100  | 2.34502900  | -2.99505900 |
| C  | 3.20094000  | -0.79875000 | -0.92257500 |
| C  | 4.40977000  | -1.21938700 | -0.35185600 |
| C  | 3.10697800  | -0.64393100 | -2.32400100 |
| C  | 5.53138300  | -1.46419600 | -1.14264300 |
| H  | 4.47001600  | -1.35925500 | 0.72244800  |
| C  | 4.24501000  | -0.89033900 | -3.09991700 |
| C  | 5.44935900  | -1.29173100 | -2.52325600 |
| H  | 6.45991800  | -1.78744100 | -0.68159600 |
| H  | 4.17970900  | -0.76662600 | -4.17761100 |
| H  | 6.31670900  | -1.47256500 | -3.15118400 |
| C  | 2.30319000  | -0.58209700 | 1.84091200  |
| C  | 1.77401500  | -1.55163400 | 2.70818200  |

|   |            |             |             |
|---|------------|-------------|-------------|
| C | 3.18917300 | 0.39363300  | 2.35603400  |
| C | 2.09060500 | -1.56036300 | 4.06452900  |
| C | 3.49418000 | 0.36520300  | 3.72260300  |
| C | 2.95267800 | -0.59264800 | 4.57709200  |
| H | 1.66500400 | -2.31964100 | 4.71375700  |
| H | 4.17422600 | 1.11539300  | 4.11807600  |
| H | 3.20474400 | -0.58349700 | 5.63327800  |
| C | 1.81298300 | -0.25924300 | -2.99271800 |
| H | 1.07274000 | -1.06465000 | -2.91894800 |
| H | 1.37199200 | 0.62015600  | -2.50980100 |
| H | 1.96842600 | -0.03653900 | -4.05138400 |
| H | 1.10826500 | -2.31195300 | 2.31718900  |
| C | 3.85942900 | 1.42354800  | 1.48278700  |
| H | 3.25671000 | 1.69706000  | 0.61671700  |
| H | 4.07886100 | 2.33178100  | 2.05104000  |
| H | 4.80932000 | 1.04298600  | 1.09102100  |

## 6

|    |             |             |             |
|----|-------------|-------------|-------------|
| Ni | 0.19620100  | -0.74108700 | -0.59655900 |
| Cl | -0.97364200 | -3.02410600 | -2.47530400 |
| P  | -1.63643000 | -0.01089300 | 0.34438300  |
| P  | 1.19646800  | 1.14546100  | -0.04391400 |
| C  | 0.20596000  | -2.67400300 | -1.14966100 |
| C  | 0.13473500  | -3.54668400 | 0.00077400  |
| C  | -1.09789300 | 1.27413400  | 1.55907300  |
| C  | 0.20987900  | 1.77913500  | 1.38327800  |
| C  | -2.92948000 | -1.05663700 | 1.22795700  |
| C  | -2.90612100 | 0.80547500  | -0.79497000 |
| C  | 1.22889600  | -3.76850200 | 0.78145000  |
| C  | 2.64448700  | -2.42242100 | -0.72817700 |
| O  | -4.01837100 | -0.26221200 | 1.74495300  |
| O  | -3.46257800 | -0.26157800 | -1.58165700 |
| C  | 0.74412000  | 2.67770900  | 2.31465400  |
| C  | -1.84713400 | 1.69866300  | 2.66847800  |
| C  | -4.02614600 | 1.46643000  | 0.00876400  |
| C  | -3.48133600 | -1.99723800 | 0.15085800  |
| C  | -2.33078500 | -1.80006100 | 2.41024600  |
| C  | -2.22947400 | 1.75378700  | -1.76670900 |
| H  | 1.17122700  | -4.38600100 | 1.67151100  |
| C  | 2.52026700  | -3.22840600 | 0.43960900  |
| H  | 1.76089300  | 3.03619000  | 2.18555300  |
| C  | -0.00992900 | 3.08942600  | 3.41223400  |
| C  | -1.30561200 | 2.59860700  | 3.58594700  |
| H  | -2.84140000 | 1.29704600  | 2.82045400  |

|   |             |             |             |
|---|-------------|-------------|-------------|
| C | -4.82757400 | 0.40102200  | 0.76813300  |
| H | -3.62483200 | 2.21442600  | 0.69660900  |
| H | -4.70702700 | 1.96814400  | -0.68731000 |
| H | -4.15636100 | -2.71660200 | 0.62640900  |
| H | -2.67596100 | -2.53790200 | -0.34757500 |
| C | -4.28505800 | -1.19703000 | -0.88213600 |
| H | -3.09665800 | -2.42933600 | 2.87449600  |
| H | -1.95318000 | -1.10134100 | 3.16077200  |
| H | -1.50226400 | -2.42981300 | 2.07597100  |
| H | -2.96803600 | 2.15043700  | -2.47062300 |
| H | -1.45185200 | 1.22901600  | -2.32699000 |
| H | -1.76548900 | 2.58685700  | -1.23287000 |
| O | -5.33336700 | -0.52349900 | -0.18516500 |
| H | 0.41471800  | 3.78078200  | 4.13392800  |
| C | -6.01491600 | 0.96239900  | 1.52157000  |
| C | -4.92617000 | -2.06531700 | -1.94181100 |
| H | -6.53757700 | 0.14739200  | 2.02626700  |
| H | -6.69962000 | 1.45114600  | 0.82517800  |
| H | -5.67860900 | 1.68857400  | 2.26580800  |
| H | -5.49678300 | -1.43456800 | -2.62655900 |
| H | -5.59795300 | -2.78884600 | -1.47476300 |
| H | -4.14892400 | -2.59360500 | -2.49771500 |
| H | -0.81710700 | -4.01205400 | 0.23547100  |
| C | 3.93568900  | -1.99130200 | -1.08001800 |
| H | 4.07610000  | -1.39622400 | -1.97785100 |
| C | 4.77243300  | -3.08880800 | 0.87998700  |
| H | 5.59784400  | -3.34898400 | 1.54070700  |
| C | 5.00929200  | -2.32232000 | -0.27216400 |
| H | 6.01316900  | -1.98506800 | -0.50688000 |
| C | 1.46833400  | -2.09389200 | -1.50648900 |
| H | 1.62165300  | -1.75697700 | -2.52626800 |
| N | 3.57242100  | -3.53693800 | 1.23387400  |
| H | -1.89317400 | 2.90744100  | 4.44550400  |
| C | 2.88513900  | 1.02067000  | 0.65834600  |
| C | 3.95653000  | 1.72274400  | 0.08961700  |
| C | 3.11877000  | 0.12134500  | 1.72669900  |
| C | 5.25758500  | 1.54437900  | 0.55705400  |
| H | 3.76829600  | 2.42071900  | -0.71926500 |
| C | 4.43103700  | -0.03239300 | 2.18362000  |
| C | 5.49458800  | 0.66171400  | 1.60880200  |
| H | 6.07602800  | 2.09571700  | 0.10389200  |
| H | 4.61905700  | -0.72838800 | 2.99568900  |
| H | 6.50348600  | 0.51018400  | 1.98097300  |
| C | 1.25665300  | 2.58312700  | -1.19664900 |

|   |            |             |             |
|---|------------|-------------|-------------|
| C | 0.77285800 | 3.84192600  | -0.81086000 |
| C | 1.72678900 | 2.39926200  | -2.51808900 |
| C | 0.75674500 | 4.91381700  | -1.70173300 |
| C | 1.71339600 | 3.49152600  | -3.39301600 |
| C | 1.23308300 | 4.73916200  | -2.99878300 |
| H | 0.37585900 | 5.87805200  | -1.37914600 |
| H | 2.07940600 | 3.35187000  | -4.40644100 |
| H | 1.22838800 | 5.56578200  | -3.70285000 |
| C | 2.01039500 | -0.64631700 | 2.40234300  |
| H | 1.48541100 | -0.02106100 | 3.13283500  |
| H | 1.26173900 | -0.99414100 | 1.68170600  |
| H | 2.41011700 | -1.52374500 | 2.91376200  |
| H | 0.39745900 | 3.98836800  | 0.19430600  |
| C | 2.21495300 | 1.06235600  | -3.01159600 |
| H | 3.00688200 | 0.65541300  | -2.37574600 |
| H | 1.39893700 | 0.33348700  | -3.00348400 |
| H | 2.60152100 | 1.14129600  | -4.03065300 |

**TS7**

|    |             |             |             |
|----|-------------|-------------|-------------|
| Ni | 0.19479900  | 0.59960900  | 0.71872900  |
| Cl | 0.26119700  | 0.99573300  | 3.04782100  |
| P  | -1.11112900 | -0.86331400 | -0.30720800 |
| P  | 2.00252100  | -0.42335700 | -0.07132100 |
| C  | -0.74247200 | 2.00677000  | 1.53843000  |
| C  | -2.13078000 | 2.22169500  | 1.77784300  |
| C  | -0.00548900 | -1.86587000 | -1.41497300 |
| C  | 1.38662800  | -1.67162900 | -1.27985100 |
| C  | -2.68660300 | -0.61567200 | -1.32797000 |
| C  | -1.95568000 | -2.07804100 | 0.87806000  |
| C  | -2.74383900 | 3.29896200  | 1.19972700  |
| C  | -0.59313100 | 4.06916800  | 0.26533100  |
| O  | -3.25561500 | -1.86417900 | -1.78088400 |
| O  | -2.99083300 | -1.30768500 | 1.52585800  |
| C  | 2.27999000  | -2.36442500 | -2.10821600 |
| C  | -0.46209900 | -2.74923000 | -2.41059500 |
| C  | -2.60038600 | -3.24653000 | 0.13477000  |
| C  | -3.69534800 | 0.04829000  | -0.38986200 |
| C  | -2.41323200 | 0.21621900  | -2.56893500 |
| C  | -0.99928400 | -2.52312800 | 1.96777200  |
| H  | -3.81097400 | 3.46796900  | 1.30537400  |
| C  | -2.01065600 | 4.23015300  | 0.39462000  |
| H  | 3.34623900  | -2.19248400 | -2.00067900 |
| C  | 1.81116200  | -3.25078600 | -3.07354000 |
| C  | 0.43592500  | -3.43312400 | -3.22786500 |

|   |             |             |             |
|---|-------------|-------------|-------------|
| H | -1.52605400 | -2.87112400 | -2.56175200 |
| C | -3.73949000 | -2.74111100 | -0.75870600 |
| H | -1.85629700 | -3.79026800 | -0.45070600 |
| H | -3.03123700 | -3.93500900 | 0.86967600  |
| H | -4.58954000 | 0.30777500  | -0.96673400 |
| H | -3.27921700 | 0.95784000  | 0.04140400  |
| C | -4.10622700 | -0.93554000 | 0.71228700  |
| H | -3.34251100 | 0.35779100  | -3.12918400 |
| H | -1.68627200 | -0.27641400 | -3.21937100 |
| H | -2.01967600 | 1.19456800  | -2.27934600 |
| H | -1.52387800 | -3.17028800 | 2.67811500  |
| H | -0.60250300 | -1.65582300 | 2.49868000  |
| H | -0.16189800 | -3.07919100 | 1.53609000  |
| O | -4.67745700 | -2.07792400 | 0.07772600  |
| H | 2.51146500  | -3.78211800 | -3.71097200 |
| C | -4.48296500 | -3.84824100 | -1.47588600 |
| C | -5.15491000 | -0.38333300 | 1.65415200  |
| H | -5.27802100 | -3.41176800 | -2.08373700 |
| H | -4.92260400 | -4.53261600 | -0.74725100 |
| H | -3.79907500 | -4.40265400 | -2.12338000 |
| H | -5.39835000 | -1.13877900 | 2.40379700  |
| H | -6.05692200 | -0.12755000 | 1.09422300  |
| H | -4.77811100 | 0.51057300  | 2.15528800  |
| H | -2.67711000 | 1.49233300  | 2.36387800  |
| C | 0.10110300  | 5.03632300  | -0.49862000 |
| H | 1.17924300  | 4.95484700  | -0.61018300 |
| C | -2.00523900 | 6.11448400  | -0.91932200 |
| H | -2.57866200 | 6.91201800  | -1.38908900 |
| C | -0.60599200 | 6.05617600  | -1.09929100 |
| H | -0.10590900 | 6.80758900  | -1.70217000 |
| C | 0.04911600  | 2.97864100  | 0.92011200  |
| H | 1.13295000  | 2.92421500  | 0.95002000  |
| N | -2.69224000 | 5.24345300  | -0.19657300 |
| H | 0.05777500  | -4.10386000 | -3.99384200 |
| C | 3.30023600  | 0.40562200  | -1.07383500 |
| C | 4.66003300  | 0.13423200  | -0.86941100 |
| C | 2.91104900  | 1.33375500  | -2.06817900 |
| C | 5.64197400  | 0.78438700  | -1.61559800 |
| H | 4.94917100  | -0.59389700 | -0.11855500 |
| C | 3.91381200  | 1.97601000  | -2.80336300 |
| C | 5.26591200  | 1.71475900  | -2.58248000 |
| H | 6.69059100  | 0.56351800  | -1.44087800 |
| H | 3.62309300  | 2.69172400  | -3.56777400 |
| H | 6.01980700  | 2.23278700  | -3.16769500 |



|   |            |             |             |
|---|------------|-------------|-------------|
| C | 2.89835400 | -1.39884300 | 1.19492800  |
| C | 2.79926500 | -2.79819700 | 1.20995200  |
| C | 3.56621900 | -0.73375800 | 2.25160100  |
| C | 3.35166500 | -3.54711300 | 2.24688000  |
| C | 4.11763200 | -1.50844000 | 3.27864300  |
| C | 4.01461300 | -2.89838700 | 3.28657700  |
| H | 3.26195300 | -4.62915300 | 2.23991700  |
| H | 4.63038600 | -1.00297300 | 4.09242100  |
| H | 4.44655600 | -3.46890000 | 4.10330800  |
| C | 1.46218000 | 1.61298500  | -2.37878700 |
| H | 0.97887900 | 0.73173700  | -2.81564800 |
| H | 0.89397800 | 1.86391200  | -1.47613100 |
| H | 1.36660800 | 2.43705400  | -3.08998300 |
| H | 2.28474900 | -3.30722800 | 0.40330100  |
| C | 3.72284200 | 0.76524500  | 2.29046700  |
| H | 4.49940700 | 1.10285300  | 1.59562400  |
| H | 2.79184800 | 1.26540200  | 2.01366200  |
| H | 3.99611700 | 1.09840900  | 3.29406100  |

## 8

|    |             |             |             |
|----|-------------|-------------|-------------|
| Ni | -0.09381500 | -1.08178000 | 0.27215200  |
| Cl | -0.66744600 | -3.22350900 | 0.69339900  |
| P  | 0.45760200  | 0.95997600  | -0.39666500 |
| P  | -2.28883600 | -0.37749400 | 0.02587700  |
| C  | 1.72812500  | -1.61277300 | 0.48448300  |
| C  | 2.37970400  | -1.36956900 | 1.72649400  |
| C  | -0.94991700 | 1.57575300  | -1.43693300 |
| C  | -2.18897800 | 0.92180200  | -1.26524800 |
| C  | 2.02278000  | 1.42156000  | -1.36660000 |
| C  | 0.79901300  | 2.23075800  | 0.97194100  |
| C  | 3.68942900  | -1.74426400 | 1.93564600  |
| C  | 3.77899300  | -2.65597200 | -0.33597400 |
| O  | 1.99891300  | 2.83358900  | -1.66686100 |
| O  | 2.06791700  | 1.87483500  | 1.53522700  |
| C  | -3.28181000 | 1.25121400  | -2.07557800 |
| C  | -0.84809200 | 2.57474700  | -2.42044400 |
| C  | 0.88173000  | 3.63145200  | 0.36426600  |
| C  | 3.24345100  | 1.15668500  | -0.48337900 |
| C  | 2.09151200  | 0.68512600  | -2.69286100 |
| C  | -0.20585900 | 2.13201300  | 2.10229900  |
| H  | 4.19183100  | -1.56284000 | 2.88110300  |
| C  | 4.43373200  | -2.37807000 | 0.90686100  |
| H  | -4.21881700 | 0.71962900  | -1.94343700 |
| C  | -3.16245200 | 2.23718800  | -3.05256000 |

|   |             |             |             |
|---|-------------|-------------|-------------|
| C | -1.94498000 | 2.89848400  | -3.21858900 |
| H | 0.09796800  | 3.07516000  | -2.57407700 |
| C | 2.10771800  | 3.73113300  | -0.55119600 |
| H | -0.03439000 | 3.87655800  | -0.17740700 |
| H | 1.00766500  | 4.35576000  | 1.17571700  |
| H | 4.13579800  | 1.38156700  | -1.07648500 |
| H | 3.28653100  | 0.12009800  | -0.16350700 |
| C | 3.22810700  | 2.09561900  | 0.72219200  |
| H | 2.97736400  | 1.01687100  | -3.24253000 |
| H | 1.20816400  | 0.87926500  | -3.30549000 |
| H | 2.16935000  | -0.38843300 | -2.50876400 |
| H | 0.11472000  | 2.78511100  | 2.91959900  |
| H | -0.26498300 | 1.10674800  | 2.47420600  |
| H | -1.19973000 | 2.43861200  | 1.77238900  |
| O | 3.25050600  | 3.43573600  | 0.23189100  |
| H | -4.01108400 | 2.48293900  | -3.68355600 |
| C | 2.30802700  | 5.10862400  | -1.14625100 |
| C | 4.42175700  | 1.92556900  | -1.63397800 |
| H | 3.19758800  | 5.10002200  | -1.77909500 |
| H | 2.44359400  | 5.84037500  | -0.34713500 |
| H | 1.44035400  | 5.38937500  | -1.74833100 |
| H | 4.34830700  | 2.63564700  | 2.46024900  |
| H | 5.34151100  | 2.11592600  | 1.07679500  |
| H | 4.44107500  | 0.90716600  | 2.02458800  |
| H | 1.84375400  | -0.86128700 | 2.52189900  |
| C | 4.54180900  | -3.30150500 | -1.34140200 |
| H | 4.07540900  | -3.53554600 | -2.29534200 |
| C | 6.40901000  | -3.29008100 | 0.17097800  |
| H | 7.45049000  | -3.53338800 | 0.37939100  |
| C | 5.85560900  | -3.61996800 | -1.09184300 |
| H | 6.46965500  | -4.11454600 | -1.83789300 |
| C | 2.42410500  | -2.26854000 | -0.51109300 |
| H | 1.93961600  | -2.51526400 | -1.45327500 |
| N | 5.74102300  | -2.69589900 | 1.13978900  |
| H | -1.84068900 | 3.66313500  | -3.98243800 |
| C | -3.53018300 | -1.54941100 | -0.62466900 |
| C | -4.75782200 | -1.71093500 | 0.02897300  |
| C | -3.23198800 | -2.30942000 | -1.77978500 |
| C | -5.70198200 | -2.62093200 | -0.44442100 |
| H | -4.97564400 | -1.12107500 | 0.91234500  |
| C | -4.19872800 | -3.20919600 | -2.23819700 |
| C | -5.41911800 | -3.37210700 | -1.58243000 |
| H | -6.64788400 | -2.73909600 | 0.07487900  |
| H | -3.98210800 | -3.80006200 | -3.12366500 |

|   |             |             |             |
|---|-------------|-------------|-------------|
| H | -6.14422600 | -4.08612400 | -1.96133700 |
| C | -3.11821100 | 0.48067100  | 1.42649100  |
| C | -3.73269200 | 1.72640300  | 1.23047100  |
| C | -3.08443100 | -0.08831900 | 2.72057700  |
| C | -4.30626200 | 2.42053100  | 2.29386700  |
| C | -3.67088500 | 0.62663200  | 3.77244700  |
| C | -4.27151100 | 1.86815900  | 3.57252100  |
| H | -4.77422600 | 3.38471900  | 2.12082800  |
| H | -3.64670800 | 0.19525900  | 4.76910400  |
| H | -4.71024500 | 2.39904500  | 4.41203100  |
| C | -1.92370400 | -2.17379800 | -2.51494600 |
| H | -1.78968100 | -1.16643700 | -2.92327000 |
| H | -1.08803000 | -2.38083600 | -1.83801100 |
| H | -1.87215200 | -2.88297600 | -3.34445400 |
| H | -3.75575000 | 2.16683700  | 0.24125900  |
| C | -2.43696300 | -1.41818700 | 2.99264400  |
| H | -2.85272800 | -2.21622000 | 2.37090200  |
| H | -1.36850800 | -1.40271900 | 2.75798400  |
| H | -2.55534300 | -1.70115800 | 4.04107300  |

**9**

|    |             |             |             |
|----|-------------|-------------|-------------|
| Ni | 0.17330700  | 0.29109700  | 0.32394800  |
| P  | -1.71128700 | -0.64897200 | -0.37895500 |
| P  | 1.13309200  | -1.81912400 | -0.01526100 |
| C  | -0.56494400 | 2.04480700  | 0.49646200  |
| C  | -0.53227100 | 2.97246400  | -0.52787300 |
| C  | -1.13737600 | 2.43993400  | 1.74195000  |
| C  | -1.25273000 | -2.11191800 | -1.42384000 |
| C  | 0.06767900  | -2.59772700 | -1.29018900 |
| C  | -3.12059300 | 0.20690200  | -1.31302700 |
| C  | -2.84589800 | -1.23516100 | 1.02178000  |
| C  | -1.67073500 | 3.69649400  | 1.92845500  |
| H  | -1.17141100 | 1.72386700  | 2.55731100  |
| O  | -4.18310600 | -0.73482900 | -1.57103300 |
| O  | -3.38840400 | -0.04135200 | 1.60667500  |
| C  | 0.52953300  | -3.62452300 | -2.12216200 |
| C  | -2.09175700 | -2.69913500 | -2.38628500 |
| C  | -3.98098400 | -2.09087600 | 0.45815400  |
| C  | -3.68090800 | 1.30926100  | -0.41188500 |
| C  | -2.65896000 | 0.73916800  | -2.65894900 |
| C  | -2.06372700 | -1.92844800 | 2.11948100  |
| C  | -1.67035700 | 4.64659400  | 0.87314500  |
| H  | 1.55304400  | -3.97109700 | -2.01807100 |
| C  | -0.31129400 | -4.18955700 | -3.07865400 |

|   |             |             |             |
|---|-------------|-------------|-------------|
| C | -1.62228300 | -3.72708400 | -3.20365800 |
| H | -3.10114500 | -2.32921200 | -2.50677700 |
| C | -4.89172000 | -1.23066600 | -0.42518900 |
| H | -3.58611400 | -2.94165200 | -0.10226400 |
| H | -4.57969700 | -2.47215200 | 1.29195400  |
| H | -4.45360500 | 1.84213500  | -0.97574700 |
| H | -2.90690200 | 2.01448700  | -0.12267100 |
| C | -4.33812500 | 0.69077200  | 0.82267300  |
| H | -3.51194100 | 1.18175600  | -3.18204000 |
| H | -2.24147900 | -0.05446100 | -3.28292700 |
| H | -1.89911000 | 1.50897400  | -2.50520300 |
| H | -2.73401300 | -2.14425700 | 2.95719800  |
| H | -1.25035300 | -1.28961400 | 2.47222000  |
| H | -1.63343700 | -2.86466300 | 1.75950300  |
| O | -5.38546100 | -0.16770800 | 0.37158500  |
| H | 0.05458800  | -4.98204400 | -3.72436800 |
| H | -2.28261600 | -4.15914700 | -3.94964500 |
| C | -6.08831700 | -1.98013200 | -0.97190100 |
| C | -4.95140600 | 1.71368500  | 1.75158300  |
| H | -6.68735200 | -1.30228700 | -1.58316400 |
| H | -6.69936900 | -2.35400000 | -0.14770100 |
| H | -5.75762700 | -2.82128100 | -1.58609500 |
| H | -5.40972200 | 1.20199600  | 2.60043000  |
| H | -5.71562400 | 2.28515400  | 1.22038300  |
| H | -4.17466300 | 2.39261700  | 2.10732800  |
| H | -0.08368900 | 2.72140100  | -1.48820100 |
| C | -1.07747500 | 4.27635600  | -0.37619700 |
| C | -2.21930800 | 6.73639200  | 0.09321000  |
| C | -1.65345300 | 6.47575200  | -1.17965000 |
| C | -1.08449300 | 5.24516600  | -1.41014100 |
| H | -2.67623500 | 7.70619800  | 0.28820200  |
| H | -1.67608300 | 7.24199100  | -1.94818200 |
| H | -0.63939300 | 5.00088200  | -2.37186500 |
| H | -2.10749500 | 3.99864800  | 2.87579200  |
| N | -2.23519000 | 5.87069100  | 1.08769900  |
| C | 2.47063100  | 2.09193200  | 0.70167000  |
| H | 2.18379500  | 2.54608100  | -0.26423300 |
| H | 2.19510000  | 2.83275300  | 1.47378900  |
| C | 3.98722600  | 1.87436200  | 0.69443400  |
| H | 4.29893300  | 1.50572000  | 1.68107400  |
| H | 4.19141500  | 1.06706100  | -0.01619600 |
| C | 4.78248100  | 3.12793800  | 0.32771300  |
| H | 4.46827700  | 3.48042600  | -0.66667100 |
| H | 4.52966000  | 3.93597400  | 1.02805300  |

|   |             |             |             |
|---|-------------|-------------|-------------|
| C | 6.30969400  | 2.93984600  | 0.32014500  |
| H | 6.60588300  | 2.57800500  | 1.31620100  |
| C | 7.01603800  | 4.27856900  | 0.07250700  |
| H | 6.74943900  | 4.67902200  | -0.91336500 |
| H | 6.73020500  | 5.02480100  | 0.82163900  |
| O | 1.85277000  | 0.85643800  | 0.91045400  |
| C | 6.75797900  | 1.89659500  | -0.71287800 |
| H | 6.33206600  | 0.90975500  | -0.51360900 |
| H | 6.44368300  | 2.19573000  | -1.72116200 |
| H | 7.84915100  | 1.79691200  | -0.72193900 |
| H | 8.10575800  | 4.16930300  | 0.10274400  |
| C | 2.80367400  | -1.82244400 | -0.76246000 |
| C | 3.79654200  | -2.68208200 | -0.27681500 |
| C | 3.10298700  | -0.91872400 | -1.80832700 |
| C | 5.09181900  | -2.64403200 | -0.79227500 |
| H | 3.55544100  | -3.38299100 | 0.51479000  |
| C | 4.40700100  | -0.90156600 | -2.31274600 |
| C | 5.39902600  | -1.74371100 | -1.80932400 |
| H | 5.85135800  | -3.31180700 | -0.39776200 |
| H | 4.64906100  | -0.20359700 | -3.10922400 |
| H | 6.40513900  | -1.69522300 | -2.21459600 |
| C | 1.18955900  | -3.06384000 | 1.33518000  |
| C | 1.84445800  | -2.75275300 | 2.55084100  |
| C | 0.50232000  | -4.28136900 | 1.20530500  |
| C | 1.76453000  | -3.68291700 | 3.59631600  |
| C | 0.44007000  | -5.18855900 | 2.26050300  |
| C | 1.07074500  | -4.88373300 | 3.46537200  |
| H | 2.26070300  | -3.44885800 | 4.53414100  |
| H | -0.10071500 | -6.12225600 | 2.14005100  |
| H | 1.02437300  | -5.57690700 | 4.30001900  |
| C | 2.06911700  | 0.01325600  | -2.38456500 |
| H | 1.21056400  | -0.53430100 | -2.78829000 |
| H | 1.69447100  | 0.68544000  | -1.60571900 |
| H | 2.49614800  | 0.61552700  | -3.18988700 |
| C | 2.65319500  | -1.49649300 | 2.73978400  |
| H | 3.65418500  | -1.62230500 | 2.30875600  |
| H | 2.22464200  | -0.61512900 | 2.24793100  |
| H | 2.77902400  | -1.28005600 | 3.80418500  |
| H | 0.00080300  | -4.52058300 | 0.27519700  |

**TS10**

|    |             |             |             |
|----|-------------|-------------|-------------|
| Ni | 0.08559100  | 0.39356600  | 0.34019400  |
| P  | -1.49672500 | -0.93483600 | -0.32655600 |
| P  | 1.56679500  | -1.32603800 | -0.04681700 |

|   |             |             |             |
|---|-------------|-------------|-------------|
| C | -0.71299500 | 2.12917000  | 0.63677000  |
| C | -1.06182800 | 2.93462100  | -0.45964100 |
| C | -1.42448300 | 2.31696000  | 1.87622500  |
| C | -0.71490200 | -2.23118000 | -1.38778800 |
| C | 0.68507300  | -2.38607400 | -1.26418700 |
| C | -3.05393400 | -0.38277200 | -1.23141000 |
| C | -2.45839200 | -1.82079700 | 1.03944200  |
| C | -2.46615500 | 3.19506000  | 1.96680700  |
| H | -1.12380100 | 1.72939800  | 2.73760300  |
| O | -3.91246100 | -1.50408800 | -1.53256800 |
| O | -3.23281800 | -0.80319500 | 1.69256300  |
| C | 1.36784200  | -3.28470400 | -2.09334000 |
| C | -1.39812300 | -2.99863800 | -2.34606500 |
| C | -3.40035400 | -2.86631400 | 0.44180600  |
| C | -3.78926100 | 0.55233900  | -0.26821700 |
| C | -2.71812700 | 0.29420900  | -2.54836400 |
| C | -1.52397600 | -2.39185300 | 2.08899400  |
| C | -2.88528600 | 3.97496400  | 0.84305600  |
| H | 2.44570700  | -3.37805000 | -2.00179100 |
| C | 0.67597700  | -4.03983200 | -3.03842700 |
| C | -0.70698800 | -3.89346000 | -3.16232100 |
| H | -2.46661500 | -2.86822200 | -2.46267700 |
| C | -4.48198300 | -2.17789600 | -0.40271600 |
| H | -2.84501900 | -3.59506000 | -0.15302800 |
| H | -3.89892000 | -3.39648100 | 1.26033200  |
| H | -4.64753800 | 0.98368800  | -0.79335300 |
| H | -3.14050600 | 1.36187500  | 0.05943200  |
| C | -4.31036400 | -0.23864100 | 0.93387000  |
| H | -3.64339500 | 0.59964600  | -3.04624000 |
| H | -2.16823600 | -0.37661100 | -3.21333700 |
| H | -2.11148100 | 1.18154900  | -2.34999100 |
| H | -2.11181500 | -2.79574000 | 2.91912700  |
| H | -0.85907300 | -1.61321100 | 2.47074700  |
| H | -0.90940700 | -3.19083200 | 1.66857300  |
| O | -5.16934100 | -1.26823200 | 0.44077900  |
| H | 1.21329100  | -4.73213000 | -3.67959200 |
| H | -1.25032900 | -4.47074600 | -3.90451300 |
| C | -5.50971100 | -3.13729700 | -0.96448100 |
| C | -5.11795200 | 0.59841800  | 1.89924900  |
| H | -6.24503500 | -2.57527000 | -1.54362900 |
| H | -6.01656000 | -3.65711500 | -0.14871100 |
| H | -5.02512800 | -3.87090600 | -1.61371100 |
| H | -5.46323200 | -0.03164000 | 2.72175400  |
| H | -5.98151200 | 1.02485500  | 1.38472900  |

|   |             |             |             |
|---|-------------|-------------|-------------|
| H | -4.49886500 | 1.40723100  | 2.28872700  |
| H | -0.53980400 | 2.83185600  | -1.40716300 |
| C | -2.14820700 | 3.83793700  | -0.38171100 |
| C | -4.34241200 | 5.49733000  | -0.07276900 |
| C | -3.69268900 | 5.44139500  | -1.32609900 |
| C | -2.60011000 | 4.61626500  | -1.47954600 |
| H | -5.20843500 | 6.14322000  | 0.06327200  |
| H | -4.05929600 | 6.04370100  | -2.15218400 |
| H | -2.07871400 | 4.54748500  | -2.43156400 |
| H | -3.01480500 | 3.32480700  | 2.89496700  |
| N | -3.95764600 | 4.79178000  | 0.98059700  |
| C | 1.81548100  | 2.73412800  | 0.18465700  |
| H | 1.77836000  | 2.38229100  | -0.85325100 |
| H | 1.48218900  | 3.78213300  | 0.18151800  |
| C | 3.23785100  | 2.60940300  | 0.70983200  |
| H | 3.27170400  | 2.99432100  | 1.73692100  |
| H | 3.49615600  | 1.54829100  | 0.75394300  |
| C | 4.24374700  | 3.35285100  | -0.17449900 |
| H | 4.33397200  | 2.82563500  | -1.13469400 |
| H | 3.85540300  | 4.35443300  | -0.40582500 |
| C | 5.64246300  | 3.50631900  | 0.44689400  |
| H | 5.53056700  | 4.09822500  | 1.36753200  |
| C | 6.56668100  | 4.27723800  | -0.50326300 |
| H | 6.71489900  | 3.71846400  | -1.43552400 |
| H | 6.14696700  | 5.25473600  | -0.76436800 |
| O | 0.94313200  | 1.98769900  | 1.02727300  |
| C | 6.26332500  | 2.15599300  | 0.82534200  |
| H | 5.66485700  | 1.62589300  | 1.57213100  |
| H | 6.34268500  | 1.50697000  | -0.05300900 |
| H | 7.26835200  | 2.29098600  | 1.23957700  |
| H | 7.55220100  | 4.44220000  | -0.05484800 |
| C | 3.16369400  | -0.98838900 | -0.87912600 |
| C | 4.37558500  | -1.45155100 | -0.34853300 |
| C | 3.16776200  | -0.17571600 | -2.03857500 |
| C | 5.59089400  | -1.11646800 | -0.94345600 |
| H | 4.36374700  | -2.08366800 | 0.53314200  |
| C | 4.39935100  | 0.15001400  | -2.61629500 |
| C | 5.60247500  | -0.31004900 | -2.08029900 |
| H | 6.52070500  | -1.48148500 | -0.51836200 |
| H | 4.41105500  | 0.77521100  | -3.50508500 |
| H | 6.54305300  | -0.03674700 | -2.54875700 |
| C | 1.96844800  | -2.46350500 | 1.33737800  |
| C | 2.43289200  | -1.92219300 | 2.55982300  |
| C | 1.72317200  | -3.84113200 | 1.23866100  |

|   |            |             |             |
|---|------------|-------------|-------------|
| C | 2.63272900 | -2.79209700 | 3.63829000  |
| C | 1.92523700 | -4.68718300 | 2.32744200  |
| C | 2.38005400 | -4.15898800 | 3.53402100  |
| H | 2.98733400 | -2.38119300 | 4.57950300  |
| H | 1.72497200 | -5.74993100 | 2.23126600  |
| H | 2.53583800 | -4.80552200 | 4.39237900  |
| C | 1.89118300 | 0.30007700  | -2.68720100 |
| H | 1.43052200 | -0.49952700 | -3.27804700 |
| H | 1.14435500 | 0.60514500  | -1.94341700 |
| H | 2.08186700 | 1.14678200  | -3.35109300 |
| C | 2.73997500 | -0.45562700 | 2.71953400  |
| H | 3.64022400 | -0.18267700 | 2.15719800  |
| H | 1.93438700 | 0.18433900  | 2.34680700  |
| H | 2.91882900 | -0.20769000 | 3.76856900  |
| H | 1.35919100 | -4.25559300 | 0.30602900  |

## 11

|    |             |             |             |
|----|-------------|-------------|-------------|
| Ni | 0.22650500  | 0.37602400  | 0.34203400  |
| P  | -1.15030800 | -1.06672600 | -0.34507000 |
| P  | 1.92523000  | -0.88636400 | 0.12987300  |
| C  | -1.24208000 | 2.73563400  | 0.66601900  |
| C  | -1.94041200 | 3.34396000  | -0.35350400 |
| C  | -1.87944400 | 2.36601600  | 1.87931400  |
| C  | -0.07356700 | -2.22411800 | -1.33647200 |
| C  | 1.31881800  | -2.14710300 | -1.09099400 |
| C  | -2.70217400 | -0.83081300 | -1.41102200 |
| C  | -2.08301600 | -2.17179700 | 0.89200600  |
| C  | -3.21423100 | 2.61634400  | 2.05607300  |
| H  | -1.28057100 | 1.88664400  | 2.64530800  |
| O  | -3.31881700 | -2.07454100 | -1.81640600 |
| O  | -3.11544200 | -1.34806500 | 1.47464400  |
| C  | 2.20246900  | -2.95475300 | -1.81879500 |
| C  | -0.53044300 | -3.10246500 | -2.33397000 |
| C  | -2.74292300 | -3.36146100 | 0.19414100  |
| C  | -3.69513800 | -0.07107600 | -0.52281300 |
| C  | -2.37824200 | -0.07058800 | -2.68550800 |
| C  | -1.17780900 | -2.59172600 | 2.03332800  |
| C  | -3.98577900 | 3.21828800  | 1.02144000  |
| H  | 3.26851400  | -2.88129000 | -1.62757300 |
| C  | 1.73045200  | -3.82893700 | -2.79659900 |
| C  | 0.36174300  | -3.89347500 | -3.05825100 |
| H  | -1.58909600 | -3.14462500 | -2.55518200 |
| C  | -3.84433500 | -2.87599800 | -0.75748800 |
| H  | -2.00073200 | -3.95719400 | -0.34098200 |



|   |             |             |             |
|---|-------------|-------------|-------------|
| H | -3.21477000 | -3.99722900 | 0.95175300  |
| H | -4.55675200 | 0.23185000  | -1.12765900 |
| H | -3.22775100 | 0.81980600  | -0.10535900 |
| C | -4.18877600 | -0.98157700 | 0.60706200  |
| H | -3.28980500 | 0.07320500  | -3.27474900 |
| H | -1.64973700 | -0.61336100 | -3.29345600 |
| H | -1.96052200 | 0.90703300  | -2.42842200 |
| H | -1.76015700 | -3.12997100 | 2.78852600  |
| H | -0.71374200 | -1.71624800 | 2.49414200  |
| H | -0.37963700 | -3.24309200 | 1.67050000  |
| O | -4.78112100 | -2.13698500 | 0.01283200  |
| H | 2.42728200  | -4.44508800 | -3.35750800 |
| H | -0.01542700 | -4.55727200 | -3.83112700 |
| C | -4.60397700 | -4.00431900 | -1.42403400 |
| C | -5.25488800 | -0.35213700 | 1.47714100  |
| H | -5.37348600 | -3.58340300 | -2.07449300 |
| H | -5.07803900 | -4.63197900 | -0.66637500 |
| H | -3.92232000 | -4.61423300 | -2.02219700 |
| H | -5.56335300 | -1.07229600 | 2.23804000  |
| H | -6.11896100 | -0.08229200 | 0.86648100  |
| H | -4.87055900 | 0.54584300  | 1.95890900  |
| H | -1.45581100 | 3.61354800  | -1.28505200 |
| C | -3.33265900 | 3.58172300  | -0.19916800 |
| C | -6.02818600 | 3.92685200  | 0.24789700  |
| C | -5.48371100 | 4.32038200  | -0.99726000 |
| C | -4.13579900 | 4.14953400  | -1.21792300 |
| H | -7.09291800 | 4.05550400  | 0.43589800  |
| H | -6.12871800 | 4.74734000  | -1.75833000 |
| H | -3.67951200 | 4.43568800  | -2.16188300 |
| H | -3.72067200 | 2.35577500  | 2.97850800  |
| N | -5.31852100 | 3.39741600  | 1.22777500  |
| C | 0.94985600  | 3.26793000  | -0.23135500 |
| H | 0.88729800  | 2.89873000  | -1.26090200 |
| H | 0.57069000  | 4.29550200  | -0.20287800 |
| C | 2.36264300  | 3.17953200  | 0.31037100  |
| H | 2.39397000  | 3.68327600  | 1.28435600  |
| H | 2.58886600  | 2.12370300  | 0.48255000  |
| C | 3.38869400  | 3.78997600  | -0.64921900 |
| H | 3.55000100  | 3.09447800  | -1.48209200 |
| H | 2.99033100  | 4.71587000  | -1.08821600 |
| C | 4.74423200  | 4.11034100  | 0.00570200  |
| H | 4.58075500  | 4.93891300  | 0.71116000  |
| C | 5.74392400  | 4.57738200  | -1.05881900 |
| H | 5.95973100  | 3.76351600  | -1.76112000 |

|   |            |             |             |
|---|------------|-------------|-------------|
| H | 5.35290200 | 5.42362900  | -1.63460600 |
| O | 0.10655600 | 2.45192500  | 0.61499400  |
| C | 5.30905400 | 2.92227100  | 0.79361700  |
| H | 4.66535100 | 2.64970800  | 1.63494600  |
| H | 5.41560900 | 2.04271200  | 0.15371500  |
| H | 6.29687300 | 3.16359200  | 1.20067900  |
| H | 6.69160400 | 4.88681300  | -0.60591400 |
| C | 3.57680100 | -0.49623800 | -0.60864300 |
| C | 4.77913200 | -0.84635000 | 0.02302100  |
| C | 3.62192900 | 0.22133600  | -1.82901700 |
| C | 6.01278300 | -0.50497100 | -0.53127700 |
| H | 4.74713000 | -1.40437000 | 0.95288300  |
| C | 4.86880600 | 0.56037100  | -2.36581600 |
| C | 6.05918900 | 0.20171700  | -1.73220700 |
| H | 6.93061400 | -0.79063500 | -0.02593100 |
| H | 4.90303400 | 1.11040200  | -3.30307300 |
| H | 7.01292200 | 0.47736900  | -2.17205900 |
| C | 2.37234200 | -1.88601600 | 1.61268400  |
| C | 2.67370200 | -1.22019500 | 2.82472100  |
| C | 2.33470200 | -3.28729900 | 1.59211600  |
| C | 2.92605900 | -1.98741100 | 3.96730900  |
| C | 2.58371200 | -4.03422700 | 2.74283500  |
| C | 2.87954700 | -3.38102400 | 3.93728700  |
| H | 3.15835800 | -1.47756600 | 4.89865200  |
| H | 2.54616200 | -5.11885400 | 2.70278100  |
| H | 3.07283400 | -3.94959700 | 4.84211000  |
| C | 2.36454400 | 0.58164900  | -2.58014700 |
| H | 1.99120000 | -0.27519400 | -3.15219900 |
| H | 1.55777300 | 0.86008900  | -1.89071900 |
| H | 2.54351700 | 1.40444100  | -3.27794300 |
| C | 2.73707600 | 0.28420500  | 2.90851200  |
| H | 3.54183600 | 0.68367500  | 2.28154500  |
| H | 1.80660900 | 0.73698900  | 2.54653100  |
| H | 2.91627800 | 0.61133100  | 3.93617800  |
| H | 2.10154000 | -3.80028700 | 0.66614500  |

**12**

|    |             |             |             |
|----|-------------|-------------|-------------|
| Ni | -0.37735100 | 0.40374900  | 0.59683300  |
| P  | -2.11263800 | -0.62714900 | -0.43201600 |
| P  | 0.77898700  | -1.67064800 | 0.11462700  |
| C  | -1.19824400 | 2.11992100  | 0.74449600  |
| C  | -1.08503800 | 3.06942700  | -0.25747900 |
| C  | -1.96477700 | 2.46352900  | 1.90110700  |
| C  | -1.47100000 | -1.96982800 | -1.53129400 |

|   |             |             |             |
|---|-------------|-------------|-------------|
| C | -0.14758700 | -2.40210500 | -1.29703200 |
| C | -3.48276800 | 0.22070800  | -1.42260200 |
| C | -3.32958400 | -1.41071900 | 0.79070900  |
| C | -2.61157400 | 3.67481000  | 2.01404700  |
| H | -2.06301800 | 1.73677500  | 2.70299200  |
| O | -4.46324500 | -0.74170600 | -1.86674400 |
| O | -3.99932800 | -0.31227500 | 1.42996200  |
| C | 0.44660400  | -3.33912300 | -2.15290500 |
| C | -2.17526500 | -2.51105300 | -2.62173500 |
| C | -4.35425000 | -2.26859800 | 0.04867100  |
| C | -4.18042600 | 1.20375000  | -0.48097200 |
| C | -2.93115000 | 0.90341200  | -2.66227300 |
| C | -2.60045300 | -2.16607400 | 1.88484100  |
| C | -2.53405600 | 4.63646700  | 0.97201300  |
| H | 1.47165200  | -3.64751700 | -1.97247300 |
| C | -0.26056000 | -3.86069200 | -3.23328600 |
| C | -1.57360800 | -3.44577700 | -3.46263500 |
| H | -3.18570100 | -2.17740200 | -2.81851300 |
| C | -5.23487300 | -1.38101400 | -0.84046000 |
| H | -3.85849900 | -3.04262400 | -0.54162800 |
| H | -5.00224600 | -2.75581700 | 0.78496200  |
| H | -4.92343400 | 1.75998900  | -1.06172300 |
| H | -3.47134400 | 1.90529000  | -0.05001400 |
| C | -4.91346900 | 0.44010500  | 0.62290900  |
| H | -3.75492400 | 1.35474000  | -3.22342600 |
| H | -2.41228000 | 0.19542200  | -3.31285900 |
| H | -2.23381900 | 1.68893200  | -2.36126500 |
| H | -3.32197900 | -2.50104700 | 2.63651400  |
| H | -1.85923700 | -1.52228900 | 2.36507200  |
| H | -2.08494000 | -3.03815900 | 1.47704700  |
| O | -5.86245000 | -0.42435800 | -0.00148400 |
| H | 0.21079500  | -4.58156300 | -3.89444900 |
| H | -2.13081200 | -3.84274900 | -4.30596500 |
| C | -6.33003000 | -2.14149400 | -1.55751300 |
| C | -5.67168300 | 1.33977700  | 1.57238700  |
| H | -6.91461800 | -1.44445500 | -2.16114800 |
| H | -6.98593900 | -2.62208900 | -0.82861400 |
| H | -5.89461000 | -2.90374200 | -2.20831100 |
| H | -6.16851400 | 0.72932600  | 2.32929300  |
| H | -6.42165200 | 1.91109300  | 1.02109200  |
| H | -4.97643000 | 2.02931700  | 2.05395400  |
| H | -0.48284400 | 2.86693200  | -1.14229200 |
| C | -1.74404800 | 4.32600800  | -0.18108700 |
| C | -3.12022400 | 6.69130400  | 0.12931100  |

|   |             |             |             |
|---|-------------|-------------|-------------|
| C | -2.36296700 | 6.48876400  | -1.05137800 |
| C | -1.67666200 | 5.30669500  | -1.20238400 |
| H | -3.67043100 | 7.62257800  | 0.26051500  |
| H | -2.33444400 | 7.26101100  | -1.81375000 |
| H | -1.08314600 | 5.10883700  | -2.09192500 |
| H | -3.20103500 | 3.93013100  | 2.88983100  |
| N | -3.21153400 | 5.81321800  | 1.10897800  |
| C | 2.07183400  | 1.88160000  | 0.85183100  |
| H | 2.00926500  | 1.61877800  | -0.21019900 |
| H | 1.93123200  | 2.97395400  | 0.89244700  |
| C | 3.49216100  | 1.52371400  | 1.30924300  |
| H | 3.62741800  | 1.80761000  | 2.36154800  |
| H | 3.59208200  | 0.43411200  | 1.26465500  |
| C | 4.57608500  | 2.15968700  | 0.43573800  |
| H | 4.33268100  | 1.96532300  | -0.61786800 |
| H | 4.56864900  | 3.25223800  | 0.55432700  |
| C | 5.97778700  | 1.61439300  | 0.71955200  |
| H | 6.28227800  | 1.88252300  | 1.74088000  |
| C | 7.03267600  | 2.10117500  | -0.27668200 |
| H | 6.70467000  | 1.84546000  | -1.29480700 |
| H | 7.09322600  | 3.19815100  | -0.24586300 |
| C | 2.47262800  | -1.52426200 | -0.57270200 |
| C | 3.54189200  | -2.24272300 | -0.02159700 |
| C | 2.70555300  | -0.61975000 | -1.63561000 |
| C | 4.84336900  | -2.05597600 | -0.48453900 |
| H | 3.35165600  | -2.95447100 | 0.77369100  |
| C | 4.02025900  | -0.44764200 | -2.08215300 |
| C | 5.08430300  | -1.14667900 | -1.51292200 |
| H | 5.66138700  | -2.61485600 | -0.04075900 |
| H | 4.20984000  | 0.25278600  | -2.89085000 |
| H | 6.09504100  | -0.97977300 | -1.87249400 |
| C | 0.84363700  | -3.04402500 | 1.34078200  |
| C | 1.39490600  | -2.82284300 | 2.62501800  |
| C | 0.25723700  | -4.28514100 | 1.04219400  |
| C | 1.32686000  | -3.86543900 | 3.56021400  |
| C | 0.19857600  | -5.30242100 | 1.99163400  |
| C | 0.73494600  | -5.08960200 | 3.26022000  |
| H | 1.74692800  | -3.69933200 | 4.54840500  |
| H | -0.26589400 | -6.25083400 | 1.73951100  |
| H | 0.69148500  | -5.87072700 | 4.01342400  |
| C | 1.58474200  | 0.11797900  | -2.32591400 |
| H | 1.06929800  | -0.53398100 | -3.03980900 |
| H | 0.82793300  | 0.46803900  | -1.61340400 |
| H | 1.96689900  | 0.98515300  | -2.86977700 |

|   |             |             |             |
|---|-------------|-------------|-------------|
| C | 2.07778600  | -1.53636000 | 3.00514700  |
| H | 3.12889100  | -1.55301800 | 2.69060100  |
| H | 1.62735600  | -0.64262500 | 2.54685500  |
| H | 2.07018900  | -1.40678200 | 4.09134800  |
| H | -0.16943900 | -4.45745800 | 0.06197300  |
| C | 8.42190400  | 1.50654600  | -0.03285400 |
| H | 8.35536200  | 0.40912900  | -0.06262300 |
| H | 8.75459900  | 1.75983600  | 0.98366300  |
| C | 9.47479200  | 1.97580200  | -1.04131000 |
| H | 9.13914500  | 1.72387600  | -2.05658900 |
| H | 9.54224100  | 3.07148600  | -1.00861700 |
| C | 10.85751800 | 1.36860600  | -0.79276900 |
| H | 10.82362000 | 0.27465000  | -0.85137300 |
| H | 11.59058000 | 1.71926800  | -1.52647600 |
| H | 11.22992100 | 1.63266500  | 0.20347400  |
| H | 5.94011100  | 0.51753800  | 0.68937200  |
| N | 1.04600000  | 1.15769200  | 1.61333800  |
| H | 0.65176000  | 1.81365100  | 2.28397900  |

### TS13

|    |             |             |             |
|----|-------------|-------------|-------------|
| Ni | 0.40387800  | 0.37321100  | -0.62719400 |
| P  | 1.97344500  | -0.75604400 | 0.41471400  |
| P  | -1.01300700 | -1.52694500 | -0.11960200 |
| C  | 1.12449400  | 2.12936900  | -0.90246500 |
| C  | 1.18209900  | 3.02308100  | 0.17722500  |
| C  | 2.00483900  | 2.38056900  | -2.01653900 |
| C  | 1.20173000  | -2.00420100 | 1.53735300  |
| C  | -0.15575700 | -2.32036200 | 1.30329600  |
| C  | 3.37678300  | 0.02740500  | 1.40379000  |
| C  | 3.15032100  | -1.67894600 | -0.74399800 |
| C  | 2.88750500  | 3.42716000  | -2.01964800 |
| H  | 1.97959500  | 1.70092600  | -2.86496300 |
| O  | 4.29140700  | -0.97298000 | 1.90168200  |
| O  | 3.89882000  | -0.65926900 | -1.42579300 |
| C  | -0.83136400 | -3.18980300 | 2.17028600  |
| C  | 1.84949600  | -2.58344500 | 2.64238900  |
| C  | 4.11302000  | -2.56451000 | 0.04747600  |
| C  | 4.13147800  | 0.92942500  | 0.42468700  |
| C  | 2.85369200  | 0.79403800  | 2.60610400  |
| C  | 2.38567700  | -2.43998800 | -1.81017500 |
| C  | 2.98267200  | 4.31774300  | -0.90822200 |
| H  | -1.87843300 | -3.41171400 | 1.98951300  |
| C  | -0.17580500 | -3.75502900 | 3.26170500  |
| C  | 1.16612500  | -3.44914500 | 3.49484300  |

|   |             |             |             |
|---|-------------|-------------|-------------|
| H | 2.88288500  | -2.33024100 | 2.84122000  |
| C | 5.03525000  | -1.69396600 | 0.91159100  |
| H | 3.56570100  | -3.28266100 | 0.66276500  |
| H | 4.73848700  | -3.12003400 | -0.65950200 |
| H | 4.89360700  | 1.48217600  | 0.98338700  |
| H | 3.45737700  | 1.64178100  | -0.04497500 |
| C | 4.83800400  | 0.07892300  | -0.63315100 |
| H | 3.69739300  | 1.21862500  | 3.15865700  |
| H | 2.28685900  | 0.14544800  | 3.27877400  |
| H | 2.20993700  | 1.60728500  | 2.26196300  |
| H | 3.09087100  | -2.86710300 | -2.53014800 |
| H | 1.70015900  | -1.77157900 | -2.33713700 |
| H | 1.80080800  | -3.24839300 | -1.36557100 |
| O | 5.72725400  | -0.80921300 | 0.04531900  |
| H | -0.71030300 | -4.42410200 | 3.92934000  |
| H | 1.68229500  | -3.87769000 | 4.34880600  |
| C | 6.07709400  | -2.48802800 | 1.67102000  |
| C | 5.66181800  | 0.89256300  | -1.60516000 |
| H | 6.69495200  | -1.80225000 | 2.25409500  |
| H | 6.71132900  | -3.03444100 | 0.96979300  |
| H | 5.59107400  | -3.19678100 | 2.34602800  |
| H | 6.14566000  | 0.22165400  | -2.31821400 |
| H | 6.42519200  | 1.45522200  | -1.06374200 |
| H | 5.01256100  | 1.58976900  | -2.13645300 |
| H | 0.53226900  | 2.88455900  | 1.03811400  |
| C | 2.09838700  | 4.10156400  | 0.20158800  |
| C | 3.98641700  | 6.12143500  | 0.09954800  |
| C | 3.16645300  | 6.00256600  | 1.24557900  |
| C | 2.22651900  | 4.99774900  | 1.29563900  |
| H | 4.73479000  | 6.91081000  | 0.04690700  |
| H | 3.28582800  | 6.70002100  | 2.06942800  |
| H | 1.57973800  | 4.87649800  | 2.16156800  |
| H | 3.55495200  | 3.60261500  | -2.85835000 |
| N | 3.90464200  | 5.31265200  | -0.94493800 |
| C | -1.65714300 | 2.48523800  | -1.01621500 |
| H | -1.51274000 | 2.51724100  | 0.06915400  |
| H | -1.58775900 | 3.53066500  | -1.35685000 |
| C | -3.05327700 | 1.92198300  | -1.29909400 |
| H | -3.27810200 | 2.00871900  | -2.37098100 |
| H | -3.03842100 | 0.85327200  | -1.06878700 |
| C | -4.15617400 | 2.58259300  | -0.47072700 |
| H | -3.90937900 | 2.46409500  | 0.59343500  |
| H | -4.18615300 | 3.66435800  | -0.66106000 |
| C | -5.53310000 | 1.96548700  | -0.72992200 |

|   |              |             |             |
|---|--------------|-------------|-------------|
| H | -5.86132600  | 2.20899100  | -1.74995600 |
| C | -6.59995700  | 2.40561300  | 0.27436900  |
| H | -6.24651300  | 2.17469300  | 1.28913000  |
| H | -6.72154500  | 3.49721500  | 0.23635500  |
| C | -2.71320400  | -1.30764300 | 0.53907200  |
| C | -3.80185200  | -2.01693200 | 0.01315700  |
| C | -2.92479800  | -0.35403900 | 1.56345000  |
| C | -5.09579100  | -1.79287400 | 0.48277500  |
| H | -3.63180500  | -2.75243600 | -0.76594500 |
| C | -4.23029300  | -0.14835200 | 2.02094800  |
| C | -5.31037700  | -0.85461200 | 1.49105600  |
| H | -5.92825800  | -2.34897900 | 0.06273000  |
| H | -4.40062400  | 0.58348900  | 2.80573400  |
| H | -6.31362000  | -0.66561500 | 1.86022900  |
| C | -1.15566800  | -2.88008800 | -1.35424200 |
| C | -1.61398700  | -2.56971400 | -2.65635500 |
| C | -0.73235200  | -4.18523100 | -1.06201700 |
| C | -1.62373800  | -3.58643100 | -3.61859300 |
| C | -0.74639700  | -5.18043900 | -2.03763300 |
| C | -1.19173900  | -4.87841200 | -3.32301900 |
| H | -1.97316700  | -3.35195000 | -4.62037400 |
| H | -0.40915000  | -6.18290600 | -1.79231300 |
| H | -1.20230300  | -5.64298200 | -4.09402200 |
| C | -1.78344000  | 0.40718500  | 2.18972400  |
| H | -1.23582800  | -0.22177300 | 2.90066700  |
| H | -1.05476200  | 0.73385800  | 1.43789200  |
| H | -2.14642800  | 1.28867200  | 2.72364200  |
| C | -2.11252900  | -1.19361600 | -3.01378300 |
| H | -3.10025000  | -1.00926000 | -2.57541700 |
| H | -1.45451900  | -0.40431100 | -2.63448400 |
| H | -2.20548100  | -1.08226000 | -4.09717800 |
| H | -0.37971600  | -4.42541000 | -0.06592800 |
| C | -7.95521500  | 1.73032000  | 0.05118300  |
| H | -7.81941100  | 0.63926300  | 0.06935000  |
| H | -8.32318700  | 1.97090400  | -0.95610300 |
| C | -9.01341100  | 2.12470900  | 1.08547400  |
| H | -8.64326900  | 1.88021600  | 2.09062200  |
| H | -9.14566600  | 3.21480000  | 1.06947800  |
| C | -10.36294200 | 1.44045700  | 0.85528500  |
| H | -10.26432100 | 0.34964800  | 0.89817100  |
| H | -11.10024500 | 1.73826000  | 1.60775200  |
| H | -10.76989400 | 1.69484000  | -0.12982500 |
| H | -5.44149300  | 0.87329800  | -0.68851600 |
| N | -0.60001800  | 1.67309300  | -1.59402800 |

|           |             |             |             |
|-----------|-------------|-------------|-------------|
| H         | -0.38499600 | 1.92916500  | -2.54798200 |
| <b>14</b> |             |             |             |
| Ni        | -0.16932700 | 0.27847000  | 0.49407700  |
| P         | -1.74588300 | -0.87511600 | -0.32870900 |
| P         | 1.29366500  | -1.23957000 | 0.10136300  |
| C         | -1.21389000 | 2.79844500  | 0.96611600  |
| C         | -1.65642000 | 3.45366100  | -0.16879200 |
| C         | -2.07618500 | 2.68311100  | 2.09458100  |
| C         | -0.88097200 | -2.05360500 | -1.48190700 |
| C         | 0.50946900  | -2.21443000 | -1.27138000 |
| C         | -3.26673400 | -0.28353700 | -1.29640600 |
| C         | -2.80574500 | -1.96122700 | 0.81730800  |
| C         | -3.34188700 | 3.20650200  | 2.06973300  |
| H         | -1.71654300 | 2.15785000  | 2.97520300  |
| O         | -4.09118000 | -1.36065400 | -1.79805900 |
| O         | -3.66475900 | -1.05419700 | 1.53900100  |
| C         | 1.25469600  | -3.03738100 | -2.12520500 |
| C         | -1.48011500 | -2.72186800 | -2.56279500 |
| C         | -3.67764900 | -2.93921700 | 0.02896200  |
| C         | -4.08878300 | 0.52118600  | -0.28453800 |
| C         | -2.86638300 | 0.55202300  | -2.50027100 |
| C         | -1.94966900 | -2.65675900 | 1.85698500  |
| C         | -3.84325500 | 3.84688500  | 0.90159600  |
| H         | 2.32234000  | -3.14533400 | -1.96026500 |
| C         | 0.64359400  | -3.69780600 | -3.19028000 |
| C         | -0.72471000 | -3.53316000 | -3.40993600 |
| H         | -2.53787500 | -2.58262600 | -2.74793100 |
| C         | -4.71323600 | -2.17518200 | -0.80373200 |
| H         | -3.06372500 | -3.57981300 | -0.60808600 |
| H         | -4.22052500 | -3.57580300 | 0.73674200  |
| H         | -4.91003900 | 1.02421200  | -0.80622900 |
| H         | -3.46544100 | 1.27305400  | 0.19472400  |
| C         | -4.68575600 | -0.41623400 | 0.77010500  |
| H         | -3.76332100 | 0.90194100  | -3.02157000 |
| H         | -2.25882500 | -0.02864900 | -3.19916600 |
| H         | -2.28924500 | 1.41806800  | -2.16624000 |
| H         | -2.59212500 | -3.17682000 | 2.57533900  |
| H         | -1.32840700 | -1.93247600 | 2.38925500  |
| H         | -1.28752100 | -3.38360300 | 1.38219000  |
| O         | -5.48594900 | -1.38337500 | 0.08956900  |
| H         | 1.23348300  | -4.32844600 | -3.84920900 |
| H         | -1.20651100 | -4.03254700 | -4.24582100 |
| C         | -5.67699500 | -3.07867100 | -1.54482300 |



|   |             |             |             |
|---|-------------|-------------|-------------|
| C | -5.58769600 | 0.28640800  | 1.76138000  |
| H | -6.38335500 | -2.46449700 | -2.10719900 |
| H | -6.22702800 | -3.69877700 | -0.83367000 |
| H | -5.13029100 | -3.72307300 | -2.23793200 |
| H | -6.01420300 | -0.45195900 | 2.44378500  |
| H | -6.39384800 | 0.80233600  | 1.23592700  |
| H | -5.01044200 | 1.01659200  | 2.32970100  |
| H | -1.01517800 | 3.55125000  | -1.03771100 |
| C | -2.97718600 | 3.96297800  | -0.23229500 |
| C | -5.58459200 | 4.85618700  | -0.20074600 |
| C | -4.81542700 | 5.02285400  | -1.37729900 |
| C | -3.51291100 | 4.57970000  | -1.39084000 |
| H | -6.61675100 | 5.20202100  | -0.17747100 |
| H | -5.25845000 | 5.49263900  | -2.24959600 |
| H | -2.89127800 | 4.68536000  | -2.27609400 |
| H | -4.00182100 | 3.13346400  | 2.92703000  |
| N | -5.12726500 | 4.29420400  | 0.90385200  |
| C | 1.18882600  | 2.94748400  | 0.36071900  |
| H | 1.08515800  | 2.75763300  | -0.70978100 |
| H | 1.09448300  | 4.03161500  | 0.51789000  |
| C | 2.53546600  | 2.43281700  | 0.84722200  |
| H | 2.66122300  | 2.68861800  | 1.90973800  |
| H | 2.51796700  | 1.34167000  | 0.78035800  |
| C | 3.72376200  | 2.96364400  | 0.04668800  |
| H | 3.58641400  | 2.69947400  | -1.00945800 |
| H | 3.76238800  | 4.06072600  | 0.09492700  |
| C | 5.04466700  | 2.36733700  | 0.53850100  |
| H | 5.22003400  | 2.67569300  | 1.57897500  |
| C | 6.25040700  | 2.75013000  | -0.32061700 |
| H | 6.05303100  | 2.45189000  | -1.35871800 |
| H | 6.37200400  | 3.84256300  | -0.33149200 |
| C | 2.99703500  | -1.00929400 | -0.58655700 |
| C | 4.12893400  | -1.57713600 | 0.01760900  |
| C | 3.16693500  | -0.17222800 | -1.71707100 |
| C | 5.41062300  | -1.34023900 | -0.48001600 |
| H | 4.00261900  | -2.22512900 | 0.87835400  |
| C | 4.45959200  | 0.04966800  | -2.20305600 |
| C | 5.57765000  | -0.52705000 | -1.59977300 |
| H | 6.27101300  | -1.79531000 | 0.00189800  |
| H | 4.58878700  | 0.68804600  | -3.07356900 |
| H | 6.56936900  | -0.33466400 | -1.99767200 |
| C | 1.57394200  | -2.50648700 | 1.41620600  |
| C | 1.93843400  | -2.08628400 | 2.71714700  |
| C | 1.35575800  | -3.87081700 | 1.17713100  |

|   |             |             |             |
|---|-------------|-------------|-------------|
| C | 2.07021100  | -3.04853100 | 3.72446600  |
| C | 1.48679900  | -4.81479800 | 2.19470800  |
| C | 1.84474600  | -4.40196600 | 3.47616300  |
| H | 2.35009200  | -2.72490700 | 4.72359200  |
| H | 1.30915400  | -5.86525400 | 1.98399600  |
| H | 1.94731400  | -5.12545200 | 4.27947300  |
| C | 1.98898600  | 0.45038500  | -2.42463500 |
| H | 1.51526800  | -0.26464700 | -3.10642400 |
| H | 1.21164300  | 0.75084000  | -1.71082800 |
| H | 2.29743900  | 1.32250900  | -3.00809500 |
| C | 2.18932600  | -0.63521400 | 3.04015500  |
| H | 3.05231500  | -0.24374000 | 2.49033500  |
| H | 1.32729000  | -0.02601400 | 2.74368200  |
| H | 2.37690500  | -0.49823300 | 4.10849100  |
| H | 1.07076100  | -4.19880800 | 0.18430900  |
| C | 7.54962600  | 2.09227100  | 0.15052200  |
| H | 7.39812500  | 1.00578700  | 0.20542900  |
| H | 7.77619700  | 2.41939300  | 1.17514700  |
| C | 8.74815300  | 2.38892200  | -0.75484100 |
| H | 8.51536400  | 2.05977400  | -1.77698300 |
| H | 8.89925400  | 3.47515600  | -0.81447000 |
| C | 10.03783800 | 1.71487300  | -0.28099100 |
| H | 9.92141600  | 0.62565800  | -0.24382900 |
| H | 10.87842500 | 1.93780300  | -0.94600500 |
| H | 10.31089900 | 2.05018500  | 0.72593200  |
| H | 4.95149700  | 1.27522300  | 0.54889500  |
| N | 0.09225700  | 2.23973700  | 1.06514800  |
| H | 0.34199400  | 2.14879000  | 2.04790100  |

**15**

|    |             |             |             |
|----|-------------|-------------|-------------|
| Ni | 0.03709200  | -0.85147400 | 0.43956400  |
| P  | 0.47030800  | 1.26535600  | -0.32052600 |
| P  | -2.33028200 | -0.16695200 | -0.08245900 |
| C  | 1.85025500  | -1.38421000 | 0.45664100  |
| C  | 2.42156000  | -1.89014600 | -0.70042300 |
| C  | 2.67989100  | -1.27751100 | 1.61075000  |
| C  | -0.94939600 | 1.98390000  | -1.26476200 |
| C  | -2.19793000 | 1.34048800  | -1.13474400 |
| C  | 2.03052400  | 1.90505800  | -1.18816700 |
| C  | 0.72738200  | 2.39050300  | 1.18508300  |
| C  | 4.00222400  | -1.66357600 | 1.59728900  |
| H  | 2.26538200  | -0.86474700 | 2.52388500  |
| O  | 1.98804200  | 3.34156600  | -1.32407300 |
| O  | 1.98887500  | 2.01134200  | 1.75580800  |

|   |             |             |             |
|---|-------------|-------------|-------------|
| C | -3.30355100 | 1.80122400  | -1.86423300 |
| C | -0.84661600 | 3.08432800  | -2.13709200 |
| C | 0.78655000  | 3.85564300  | 0.75144400  |
| C | 3.23129400  | 1.56094400  | -0.30419600 |
| C | 2.16344900  | 1.32765800  | -2.58727300 |
| C | -0.32296500 | 2.13020400  | 2.24816100  |
| C | 4.59584900  | -2.17949000 | 0.41608100  |
| H | -4.25327300 | 1.28514700  | -1.76823900 |
| C | -3.18886400 | 2.89511500  | -2.71599700 |
| C | -1.95408000 | 3.53207300  | -2.85309300 |
| H | 0.10738600  | 3.57943500  | -2.25532300 |
| C | 2.03503400  | 4.09784800  | -0.10581800 |
| H | -0.11915000 | 4.13873400  | 0.21101600  |
| H | 0.86705700  | 4.48131000  | 1.64654300  |
| H | 4.13688700  | 1.86936700  | -0.83679800 |
| H | 3.28397100  | 0.49432600  | -0.10790900 |
| C | 3.16102200  | 2.34997400  | 1.00476400  |
| H | 3.04640500  | 1.75522000  | -3.07181300 |
| H | 1.28653500  | 1.55157600  | -3.19954400 |
| H | 2.28586700  | 0.24381200  | -2.52096000 |
| H | -0.09921100 | 2.72820500  | 3.13709500  |
| H | -0.32921700 | 1.07339300  | 2.52473200  |
| H | -1.31838500 | 2.39630400  | 1.88546200  |
| O | 3.16338200  | 3.73881800  | 0.67377000  |
| H | -4.05195900 | 3.24159900  | -3.27628800 |
| H | -1.84877900 | 4.37907600  | -3.52459000 |
| C | 2.21273500  | 5.54256500  | -0.52182500 |
| C | 4.33814200  | 2.10298300  | 1.92096100  |
| H | 3.12106000  | 5.63423000  | -1.12066900 |
| H | 2.30246500  | 6.17475900  | 0.36406600  |
| H | 1.35598600  | 5.87193200  | -1.11486000 |
| H | 4.22116300  | 2.70052900  | 2.82742200  |
| H | 5.26356500  | 2.39090800  | 1.41749900  |
| H | 4.38372100  | 1.04471800  | 2.18091900  |
| H | 1.83183100  | -1.99578500 | -1.60946800 |
| C | 3.78159200  | -2.29510300 | -0.75550900 |
| C | 6.43857400  | -3.01042100 | -0.67413500 |
| C | 5.72233600  | -3.17115300 | -1.88708700 |
| C | 4.39565000  | -2.81257200 | -1.92394000 |
| H | 7.49109300  | -3.28912200 | -0.63254700 |
| H | 6.22495800  | -3.57148800 | -2.76196300 |
| H | 3.80700400  | -2.91907300 | -2.83223600 |
| H | 4.62990200  | -1.58328600 | 2.47997200  |
| N | 5.91321700  | -2.53638700 | 0.43828200  |

|   |             |             |             |
|---|-------------|-------------|-------------|
| C | -0.29267700 | -3.76733600 | 1.14735800  |
| C | -3.29670200 | -1.23574500 | -1.22349100 |
| C | -4.65281800 | -1.50831000 | -1.00054300 |
| C | -2.65393800 | -1.76548500 | -2.36600400 |
| C | -5.37253100 | -2.32385700 | -1.87220200 |
| H | -5.15046400 | -1.07208100 | -0.14165000 |
| C | -3.39350800 | -2.58684400 | -3.22393000 |
| C | -4.73659400 | -2.87331900 | -2.98384100 |
| H | -6.42171100 | -2.52709700 | -1.68062100 |
| H | -2.90190600 | -3.00463000 | -4.09826200 |
| H | -5.28310300 | -3.51795500 | -3.66556800 |
| C | -3.50008900 | 0.31431800  | 1.25068300  |
| C | -3.92959900 | -0.65229500 | 2.19171900  |
| C | -3.88405700 | 1.65553100  | 1.40819600  |
| C | -4.73547400 | -0.22491400 | 3.25497500  |
| C | -4.67667100 | 2.05611000  | 2.48193200  |
| C | -5.10466700 | 1.10983300  | 3.41066500  |
| H | -5.06961900 | -0.96311100 | 3.97892800  |
| H | -4.95574500 | 3.09999500  | 2.58793500  |
| H | -5.72089800 | 1.40745700  | 4.25383700  |
| C | -1.22555300 | -1.42800700 | -2.70959000 |
| H | -1.15304300 | -0.41828900 | -3.13005800 |
| H | -0.58119200 | -1.45279700 | -1.82337300 |
| H | -0.82252500 | -2.13135800 | -3.44214500 |
| C | -3.57076500 | -2.11069600 | 2.06838500  |
| H | -4.25531400 | -2.62597300 | 1.38492300  |
| H | -2.54579900 | -2.24731200 | 1.68994100  |
| H | -3.64310400 | -2.60438600 | 3.04123200  |
| H | -3.56022900 | 2.39631500  | 0.68672900  |
| N | -0.47762000 | -2.35981300 | 1.49167300  |
| C | 1.07030400  | -4.40679500 | 1.48200700  |
| H | 1.36266300  | -4.21720900 | 2.51830600  |
| H | 1.01479100  | -5.49366200 | 1.34830500  |
| H | 1.85944600  | -4.02142500 | 0.83442800  |
| C | -0.64711400 | -4.00522900 | -0.31972700 |
| H | -1.62687800 | -3.58190800 | -0.55471000 |
| H | 0.09787000  | -3.53841300 | -0.97066700 |
| H | -0.66629900 | -5.07622400 | -0.54847900 |
| C | -0.27489500 | -2.10995100 | 2.90686500  |
| H | -0.88713400 | -2.80786200 | 3.50500900  |
| H | 0.76091700  | -2.21479800 | 3.27070800  |
| H | -0.61164100 | -1.09688700 | 3.16141800  |
| H | -1.04175900 | -4.31667000 | 1.75365700  |

**TS16**

|    |             |             |             |
|----|-------------|-------------|-------------|
| Ni | -0.05593100 | -0.70642700 | 0.45162800  |
| P  | 0.46518200  | 1.31661400  | -0.24308700 |
| P  | -2.33584300 | -0.10513500 | -0.09463800 |
| C  | 1.63205100  | -1.62691700 | 0.67911000  |
| C  | 2.11705600  | -2.17104000 | -0.52807400 |
| C  | 2.61205300  | -1.37827300 | 1.70753300  |
| C  | -0.92611600 | 2.06137700  | -1.20867900 |
| C  | -2.18391700 | 1.42999500  | -1.10223100 |
| C  | 2.03821500  | 1.78379100  | -1.17579100 |
| C  | 0.82158600  | 2.50760500  | 1.18452600  |
| C  | 3.93375500  | -1.70356900 | 1.54960500  |
| H  | 2.30623900  | -0.89675100 | 2.62779200  |
| O  | 2.11539500  | 3.20952900  | -1.39434700 |
| O  | 2.05526600  | 2.06131000  | 1.77065300  |
| C  | -3.27711700 | 1.91541000  | -1.83403200 |
| C  | -0.79759800 | 3.16436000  | -2.07258600 |
| C  | 1.00017100  | 3.93587900  | 0.67102500  |
| C  | 3.20774000  | 1.37156700  | -0.28003300 |
| C  | 2.08846100  | 1.11267600  | -2.53732600 |
| C  | -0.24336900 | 2.38325300  | 2.25799500  |
| C  | 4.42459100  | -2.26698800 | 0.33725900  |
| H  | -4.23452900 | 1.41025300  | -1.75630400 |
| C  | -3.13794700 | 3.01850100  | -2.67136600 |
| C  | -1.89179000 | 3.63579900  | -2.79482700 |
| H  | 0.17072500  | 3.63192000  | -2.19090300 |
| C  | 2.24834000  | 4.02004300  | -0.21910000 |
| H  | 0.11090400  | 4.27295900  | 0.13420100  |
| H  | 1.15692200  | 4.59865600  | 1.52878000  |
| H  | 4.13836400  | 1.53967500  | -0.83163600 |
| H  | 3.14252100  | 0.31872100  | -0.01522500 |
| C  | 3.23672100  | 2.24402400  | 0.97801000  |
| H  | 3.00772500  | 1.40412700  | -3.05445300 |
| H  | 1.23406800  | 1.40041900  | -3.15562300 |
| H  | 2.08480600  | 0.02732700  | -2.40370500 |
| H  | 0.02203700  | 3.00462700  | 3.11912200  |
| H  | -0.33096200 | 1.34203400  | 2.58000700  |
| H  | -1.21564300 | 2.70403900  | 1.87497900  |
| O  | 3.35589600  | 3.60489500  | 0.56208000  |
| H  | -3.99085900 | 3.38439400  | -3.23500200 |
| H  | -1.76728500 | 4.48378500  | -3.46181000 |
| C  | 2.54280400  | 5.42106400  | -0.71217400 |
| C  | 4.40735600  | 1.95500800  | 1.89018700  |
| H  | 3.44715600  | 5.40298500  | -1.32358500 |

|   |             |             |             |
|---|-------------|-------------|-------------|
| H | 2.69762500  | 6.08842600  | 0.13829900  |
| H | 1.70922800  | 5.79175000  | -1.31397400 |
| H | 4.36887400  | 2.62888800  | 2.74869900  |
| H | 5.34354600  | 2.11262700  | 1.35056400  |
| H | 4.36043100  | 0.92065300  | 2.23045500  |
| H | 1.44141200  | -2.35066600 | -1.35866500 |
| C | 3.48052500  | -2.48496300 | -0.72055500 |
| C | 6.18384800  | -3.03574200 | -0.92255800 |
| C | 5.34404000  | -3.28921400 | -2.03344500 |
| C | 3.99932000  | -3.01542200 | -1.93301100 |
| H | 7.24990900  | -3.24803300 | -0.98938100 |
| H | 5.76688300  | -3.69534400 | -2.94761200 |
| H | 3.32435300  | -3.19925500 | -2.76592300 |
| H | 4.65571300  | -1.51220400 | 2.33834500  |
| N | 5.74957100  | -2.54098100 | 0.22492200  |
| C | -0.22516700 | -3.76454500 | 1.06154100  |
| C | -3.38172900 | -1.11944300 | -1.21264400 |
| C | -4.71627600 | -1.42009900 | -0.90872100 |
| C | -2.79980500 | -1.62634800 | -2.39889800 |
| C | -5.47651900 | -2.23148800 | -1.74956600 |
| H | -5.16376500 | -1.00967200 | -0.00966100 |
| C | -3.58025500 | -2.44091600 | -3.22577200 |
| C | -4.90336300 | -2.74882700 | -2.91008300 |
| H | -6.50873500 | -2.45532600 | -1.49788200 |
| H | -3.13780100 | -2.83855700 | -4.13519000 |
| H | -5.48256000 | -3.38777100 | -3.56981600 |
| C | -3.42702800 | 0.36224700  | 1.30251700  |
| C | -3.74876100 | -0.61449700 | 2.27499700  |
| C | -3.84705500 | 1.68809200  | 1.48660400  |
| C | -4.49036400 | -0.22030700 | 3.39440300  |
| C | -4.57767100 | 2.05907400  | 2.61397200  |
| C | -4.90135700 | 1.10011200  | 3.57191600  |
| H | -4.74114200 | -0.96728200 | 4.14274500  |
| H | -4.89035300 | 3.09115600  | 2.73999600  |
| H | -5.46824100 | 1.37694400  | 4.45569100  |
| C | -1.38955100 | -1.27999500 | -2.80528100 |
| H | -1.33688300 | -0.26465400 | -3.21448300 |
| H | -0.70364700 | -1.30931000 | -1.95033300 |
| H | -1.01955800 | -1.97180900 | -3.56588400 |
| C | -3.32991000 | -2.05364000 | 2.11852100  |
| H | -3.98028100 | -2.58282500 | 1.41317700  |
| H | -2.30895100 | -2.12680800 | 1.73362100  |
| H | -3.37784100 | -2.57937100 | 3.07552200  |
| H | -3.59973000 | 2.43705000  | 0.74329100  |

|   |             |             |             |
|---|-------------|-------------|-------------|
| N | 0.06300600  | -2.37689500 | 1.45861200  |
| C | 0.97291500  | -4.71776700 | 1.21994400  |
| H | 1.41567300  | -4.63587300 | 2.21642400  |
| H | 0.64668600  | -5.75446300 | 1.08258500  |
| H | 1.75172800  | -4.49871200 | 0.48788700  |
| C | -0.84596500 | -3.86236500 | -0.33059100 |
| H | -1.70215400 | -3.19227600 | -0.42487900 |
| H | -0.12441800 | -3.61410700 | -1.11051900 |
| H | -1.19054700 | -4.88560500 | -0.51397900 |
| C | 0.14149800  | -2.22123800 | 2.90379200  |
| H | -0.77784400 | -2.59919000 | 3.37193100  |
| H | 0.99231400  | -2.75427300 | 3.35663100  |
| H | 0.22680200  | -1.16468400 | 3.16888100  |
| H | -0.99991600 | -4.10919400 | 1.76857400  |

**17**

|    |             |             |             |
|----|-------------|-------------|-------------|
| Ni | -0.37356700 | -0.62371300 | 0.50376700  |
| P  | 0.45776500  | 1.19269800  | -0.23902400 |
| P  | -2.31526800 | -0.16615700 | -0.18572800 |
| C  | 1.97656600  | -2.12026400 | 1.16125000  |
| C  | 2.05523800  | -2.35468900 | -0.19889000 |
| C  | 3.17697800  | -2.02927900 | 1.91550000  |
| C  | -0.81276200 | 1.88036500  | -1.40765700 |
| C  | -2.06821000 | 1.23065500  | -1.39504600 |
| C  | 2.12423300  | 1.62180400  | -1.04356600 |
| C  | 0.69502700  | 2.49849900  | 1.11883800  |
| C  | 4.40863800  | -2.13670800 | 1.30652500  |
| H  | 3.12831800  | -1.85737200 | 2.98341300  |
| O  | 2.30618200  | 3.03136300  | -1.31954700 |
| O  | 1.84367200  | 2.04876400  | 1.88001200  |
| C  | -3.06182000 | 1.61518600  | -2.30365600 |
| C  | -0.59252200 | 2.91074900  | -2.33752500 |
| C  | 0.99278200  | 3.88647300  | 0.55495400  |
| C  | 3.17174300  | 1.20319100  | -0.00633700 |
| C  | 2.29985200  | 0.90413100  | -2.36973800 |
| C  | -0.48043400 | 2.51197300  | 2.07752500  |
| C  | 4.51136300  | -2.36338400 | -0.08700900 |
| H  | -4.01809400 | 1.10087400  | -2.29406900 |
| C  | -2.82892200 | 2.63828300  | -3.22177200 |
| C  | -1.59155800 | 3.28440900  | -3.23662900 |
| H  | 0.37375600  | 3.39928500  | -2.37006100 |
| C  | 2.33720300  | 3.88514600  | -0.17881600 |
| H  | 0.19037400  | 4.20568100  | -0.11423400 |
| H  | 1.05906300  | 4.60151400  | 1.38275000  |

|   |             |             |             |
|---|-------------|-------------|-------------|
| H | 4.17026400  | 1.28922800  | -0.44825200 |
| H | 3.01311000  | 0.17121400  | 0.30278200  |
| C | 3.10495700  | 2.13695900  | 1.20846700  |
| H | 3.28559900  | 1.13168200  | -2.78794400 |
| H | 1.53460700  | 1.21438200  | -3.08549600 |
| H | 2.22252500  | -0.17414100 | -2.21907300 |
| H | -0.26327300 | 3.17356800  | 2.92297900  |
| H | -0.68891200 | 1.50675000  | 2.44913800  |
| H | -1.37894600 | 2.87068100  | 1.56995000  |
| O | 3.33508900  | 3.46520900  | 0.74842000  |
| H | -3.60505500 | 2.92425600  | -3.92588800 |
| H | -1.39894600 | 4.07607300  | -3.95530700 |
| C | 2.75139700  | 5.25143300  | -0.68430300 |
| C | 4.15884700  | 1.83249600  | 2.25204000  |
| H | 3.71861700  | 5.17066700  | -1.18464600 |
| H | 2.83659400  | 5.94767100  | 0.15287200  |
| H | 2.01088400  | 5.62905300  | -1.39371100 |
| H | 4.05498700  | 2.53065100  | 3.08528100  |
| H | 5.15422100  | 1.93768300  | 1.81531600  |
| H | 4.03449800  | 0.80990600  | 2.61489300  |
| H | 1.14450800  | -2.37448900 | -0.78571800 |
| C | 3.30401600  | -2.48847500 | -0.84576100 |
| C | 5.81550400  | -2.63592300 | -1.95536600 |
| C | 4.68226400  | -2.77249800 | -2.80018900 |
| C | 3.42917700  | -2.69996900 | -2.24397700 |
| H | 6.81385000  | -2.69227500 | -2.38721500 |
| H | 4.81986600  | -2.92982100 | -3.86489600 |
| H | 2.53276200  | -2.79460900 | -2.85114400 |
| H | 5.32901400  | -2.04805400 | 1.87352200  |
| N | 5.75083800  | -2.44036900 | -0.65443200 |
| C | -0.02278400 | -3.26708200 | 2.04935400  |
| C | -3.36677900 | -1.28679800 | -1.21141900 |
| C | -4.73114100 | -1.48230800 | -0.95358100 |
| C | -2.74926500 | -2.01884900 | -2.25442100 |
| C | -5.48092400 | -2.40036100 | -1.68842900 |
| H | -5.21111000 | -0.90291200 | -0.17164300 |
| C | -3.51709000 | -2.93680700 | -2.97844000 |
| C | -4.86989700 | -3.13596900 | -2.70250600 |
| H | -6.53639000 | -2.53541000 | -1.47028500 |
| H | -3.04225700 | -3.50207500 | -3.77669800 |
| H | -5.44095000 | -3.85774900 | -3.27902700 |
| C | -3.50906000 | 0.55240300  | 1.02571300  |
| C | -3.94448300 | -0.22522800 | 2.12767700  |
| C | -3.89686600 | 1.89938400  | 0.95161100  |



|   |             |             |             |
|---|-------------|-------------|-------------|
| C | -4.75151900 | 0.37541000  | 3.10058100  |
| C | -4.69655400 | 2.48063500  | 1.93414200  |
| C | -5.12802600 | 1.71509800  | 3.01543100  |
| H | -5.08550000 | -0.22415600 | 3.94368500  |
| H | -4.98072000 | 3.52559400  | 1.85091400  |
| H | -5.75068900 | 2.15481000  | 3.78894800  |
| C | -1.30267500 | -1.80069100 | -2.61903200 |
| H | -1.17661900 | -0.87938600 | -3.19960500 |
| H | -0.68957600 | -1.67388400 | -1.71620300 |
| H | -0.91243900 | -2.63402400 | -3.21027000 |
| C | -3.56702800 | -1.67654100 | 2.27048100  |
| H | -4.11919500 | -2.30716100 | 1.56472900  |
| H | -2.50609100 | -1.81156000 | 2.03625100  |
| H | -3.76862400 | -2.03966800 | 3.28189700  |
| H | -3.56869800 | 2.50176400  | 0.11292100  |
| N | 0.67439500  | -1.95442400 | 1.77118500  |
| C | 0.85081200  | -4.25683700 | 2.82812900  |
| H | 1.25880100  | -3.81939200 | 3.74384200  |
| H | 0.25382500  | -5.12748400 | 3.11543100  |
| H | 1.68682400  | -4.60807100 | 2.21634900  |
| C | -0.58576200 | -3.90106100 | 0.78074800  |
| H | -1.17766700 | -3.16776500 | 0.22569300  |
| H | 0.20953800  | -4.28288700 | 0.13442700  |
| H | -1.22908500 | -4.74475100 | 1.04993100  |
| C | 0.70452700  | -1.11721000 | 2.99294500  |
| H | -0.32700100 | -0.87961700 | 3.25974800  |
| H | 1.17449300  | -1.61758800 | 3.85135300  |
| H | 1.23124300  | -0.18725600 | 2.77435000  |
| H | -0.87031100 | -2.97922400 | 2.67841600  |

## 18

|    |             |             |             |
|----|-------------|-------------|-------------|
| Ni | 0.01382300  | -0.84685200 | 0.40487600  |
| P  | 0.53307800  | 1.25391900  | -0.31698300 |
| P  | -2.29351800 | -0.07507000 | -0.08299900 |
| C  | 1.81136800  | -1.41295500 | 0.43621000  |
| C  | 2.41759300  | -1.89568100 | -0.71135500 |
| C  | 2.59415000  | -1.35828900 | 1.62777100  |
| C  | -0.83093700 | 1.97427800  | -1.33561000 |
| C  | -2.08303200 | 1.33104900  | -1.25459100 |
| C  | 2.13134800  | 1.85371200  | -1.14586700 |
| C  | 0.77655500  | 2.37817200  | 1.19186200  |
| C  | 3.91360000  | -1.75163500 | 1.65196800  |
| H  | 2.14329000  | -0.97898100 | 2.54041200  |
| O  | 2.11464800  | 3.29100200  | -1.28838800 |

|   |             |             |             |
|---|-------------|-------------|-------------|
| O | 2.01846600  | 1.97370700  | 1.78934900  |
| C | -3.14186100 | 1.75101500  | -2.07192700 |
| C | -0.67987300 | 3.04582700  | -2.23548600 |
| C | 0.87239400  | 3.83946900  | 0.75294100  |
| C | 3.30584400  | 1.49632600  | -0.23315100 |
| C | 2.29163600  | 1.27106900  | -2.54006400 |
| C | -0.29410500 | 2.14176800  | 2.23982500  |
| C | 4.54806000  | -2.23216200 | 0.47587600  |
| H | -4.09547300 | 1.23711800  | -2.00917900 |
| C | -2.97580800 | 2.80738800  | -2.96280400 |
| C | -1.74138500 | 3.45470500  | -3.03978200 |
| H | 0.27642500  | 3.54501400  | -2.30984500 |
| C | 2.14609400  | 4.05383300  | -0.07416900 |
| H | -0.01438000 | 4.13261500  | 0.18631300  |
| H | 0.93943600  | 4.47085500  | 1.64522000  |
| H | 4.22792000  | 1.78903300  | -0.74599500 |
| H | 3.33963000  | 0.43043000  | -0.02978600 |
| C | 3.21493000  | 2.29172000  | 1.06980800  |
| H | 3.19549400  | 1.68219500  | -2.99965400 |
| H | 1.43698500  | 1.50870600  | -3.17759400 |
| H | 2.39304500  | 0.18585000  | -2.46852600 |
| H | -0.04456800 | 2.70720500  | 3.14303700  |
| H | -0.35564000 | 1.07958000  | 2.49073800  |
| H | -1.27207400 | 2.46625300  | 1.87957900  |
| O | 3.24844300  | 3.67915000  | 0.73537800  |
| H | -3.80143000 | 3.12083100  | -3.59452700 |
| H | -1.59932000 | 4.27771000  | -3.73393300 |
| C | 2.36049500  | 5.49243900  | -0.49399300 |
| C | 4.36326100  | 2.02678200  | 2.01721200  |
| H | 3.28535600  | 5.56404500  | -1.06982900 |
| H | 2.43872200  | 6.12866100  | 0.39011600  |
| H | 1.52522500  | 5.83299800  | -1.11085400 |
| H | 4.23386400  | 2.62901300  | 2.91887100  |
| H | 5.30667900  | 2.29585800  | 1.53725700  |
| H | 4.38270300  | 0.96844400  | 2.28130600  |
| H | 1.85700600  | -1.97376700 | -1.64148000 |
| C | 3.77643000  | -2.31011800 | -0.72742800 |
| C | 6.42637600  | -3.04068700 | -0.56966800 |
| C | 5.75426300  | -3.16366900 | -1.81147300 |
| C | 4.43089400  | -2.79785000 | -1.88645000 |
| H | 7.47566900  | -3.32499300 | -0.49740300 |
| H | 6.28687100  | -3.54113600 | -2.67873200 |
| H | 3.87607900  | -2.87507100 | -2.81863400 |
| H | 4.50773500  | -1.70803800 | 2.55999400  |

|   |             |             |             |
|---|-------------|-------------|-------------|
| N | 5.86178800  | -2.59605300 | 0.53604000  |
| C | -0.41414200 | -3.78012000 | 1.08111300  |
| C | -1.45042400 | -4.51070700 | 1.96644300  |
| H | -1.22069300 | -4.36259000 | 3.02732900  |
| H | -2.45598100 | -4.12579100 | 1.78003500  |
| C | -3.39518900 | -1.15728400 | -1.07522800 |
| C | -4.71897900 | -1.40546000 | -0.69047800 |
| C | -2.87831500 | -1.75681800 | -2.24771300 |
| C | -5.53181200 | -2.25868400 | -1.43543800 |
| H | -5.11822200 | -0.91799400 | 0.19189500  |
| C | -3.71123700 | -2.61080900 | -2.97788500 |
| C | -5.02261800 | -2.86888800 | -2.58004400 |
| H | -6.55443900 | -2.44296700 | -1.12090100 |
| H | -3.31890600 | -3.08179500 | -3.87515400 |
| H | -5.64283000 | -3.54160100 | -3.16468700 |
| C | -3.37180200 | 0.65341600  | 1.22497400  |
| C | -3.73394900 | -0.12696300 | 2.34773700  |
| C | -3.76305300 | 2.00043000  | 1.16377300  |
| C | -4.47595600 | 0.48326500  | 3.36798600  |
| C | -4.49409100 | 2.58656300  | 2.19521800  |
| C | -4.85098200 | 1.82349200  | 3.30499400  |
| H | -4.75520900 | -0.11397800 | 4.23158800  |
| H | -4.77838900 | 3.63232900  | 2.12885500  |
| H | -5.41663400 | 2.26785700  | 4.11860300  |
| C | -1.48421000 | -1.46965100 | -2.74727900 |
| H | -1.44673000 | -0.51024500 | -3.27540100 |
| H | -0.76337100 | -1.41079400 | -1.92339000 |
| H | -1.14862100 | -2.25069600 | -3.43372700 |
| C | -3.36579600 | -1.58046400 | 2.45555100  |
| H | -4.02213500 | -2.19539600 | 1.82743200  |
| H | -2.33138900 | -1.77936600 | 2.13012100  |
| H | -3.47616300 | -1.93317100 | 3.48462800  |
| H | -3.48689800 | 2.60431600  | 0.30851500  |
| N | -0.42670600 | -2.35427500 | 1.46719700  |
| H | 0.18024400  | -2.28285700 | 2.28574700  |
| C | 0.95482200  | -4.45976200 | 1.29085000  |
| H | 1.29121300  | -4.33327200 | 2.32657500  |
| H | 0.89078500  | -5.53600300 | 1.09055700  |
| H | 1.71493200  | -4.03363600 | 0.63613100  |
| C | -0.83183100 | -3.92440900 | -0.38429800 |
| H | -1.79640700 | -3.44255900 | -0.55830100 |
| H | -0.08644800 | -3.46247000 | -1.03703600 |
| H | -0.92274600 | -4.98003400 | -0.66306200 |
| H | -1.45105200 | -5.58907700 | 1.76702000  |

**TS19**

|    |             |             |             |
|----|-------------|-------------|-------------|
| Ni | 0.07158600  | 0.76448600  | 0.36707800  |
| P  | -0.51733300 | -1.26316700 | -0.29183600 |
| P  | 2.32488300  | 0.01095300  | -0.06830700 |
| C  | -1.58872500 | 1.68641100  | 0.57913800  |
| C  | -2.23097200 | 2.13485600  | -0.58772400 |
| C  | -2.41468500 | 1.50285000  | 1.74838100  |
| C  | 0.82583600  | -1.99854900 | -1.32760700 |
| C  | 2.10000200  | -1.39782300 | -1.23071100 |
| C  | -2.13231700 | -1.70202500 | -1.17171900 |
| C  | -0.84141300 | -2.46430300 | 1.13732600  |
| C  | -3.75558500 | 1.77168300  | 1.74209100  |
| H  | -1.95479400 | 1.12599400  | 2.65879100  |
| O  | -2.23081900 | -3.12498100 | -1.40064100 |
| O  | -2.04936500 | -2.00843400 | 1.76665900  |
| C  | 3.15039000  | -1.84513300 | -2.04380700 |
| C  | 0.64275500  | -3.04652100 | -2.24739100 |
| C  | -1.05066500 | -3.88398300 | 0.61076800  |
| C  | -3.26609200 | -1.28914000 | -0.23099800 |
| C  | -2.23175600 | -1.02300300 | -2.52617600 |
| C  | 0.25067100  | -2.37295000 | 2.18532300  |
| C  | -4.41599600 | 2.22333600  | 0.55924500  |
| H  | 4.12020200  | -1.36304300 | -1.97098900 |
| C  | 2.95340500  | -2.88423100 | -2.94970800 |
| C  | 1.69592000  | -3.48227800 | -3.04954500 |
| H  | -0.33462000 | -3.50067200 | -2.34388900 |
| C  | -2.33201000 | -3.94686300 | -0.23078800 |
| H  | -0.18601000 | -4.21599000 | 0.03159300  |
| H  | -1.17551700 | -4.55927400 | 1.46400800  |
| H  | -4.21655600 | -1.44105500 | -0.75265900 |
| H  | -3.18122600 | -0.24036400 | 0.04152600  |
| C  | -3.25991100 | -2.17337900 | 1.01735100  |
| H  | -3.16632300 | -1.32024000 | -3.01151800 |
| H  | -1.39752400 | -1.29992800 | -3.17551600 |
| H  | -2.23412400 | 0.06043700  | -2.38483100 |
| H  | -0.02649900 | -2.97719400 | 3.05483000  |
| H  | 0.38797700  | -1.33511400 | 2.49996400  |
| H  | 1.20038800  | -2.73798200 | 1.78871800  |
| O  | -3.40674100 | -3.52925400 | 0.59420600  |
| H  | 3.77274200  | -3.21977400 | -3.57834800 |
| H  | 1.52980000  | -4.28644600 | -3.76024700 |
| C  | -2.65882200 | -5.33932000 | -0.72771500 |
| C  | -4.39346300 | -1.87674500 | 1.97276500  |

|   |             |             |             |
|---|-------------|-------------|-------------|
| H | -3.58433600 | -5.30537200 | -1.30589000 |
| H | -2.79030600 | -6.01412100 | 0.12083400  |
| H | -1.85121200 | -5.71178100 | -1.36286100 |
| H | -4.33023800 | -2.55326700 | 2.82774700  |
| H | -5.35039200 | -2.02302400 | 1.46747700  |
| H | -4.32270800 | -0.84345100 | 2.31365000  |
| H | -1.66627800 | 2.27554900  | -1.50465000 |
| C | -3.62077600 | 2.40002400  | -0.62191800 |
| C | -6.35061200 | 2.83907200  | -0.51453900 |
| C | -5.66771300 | 3.04507500  | -1.73515600 |
| C | -4.30890600 | 2.82723500  | -1.78841100 |
| H | -7.42509300 | 3.00663700  | -0.45801800 |
| H | -6.21773300 | 3.37079900  | -2.61312800 |
| H | -3.75226300 | 2.97549900  | -2.71096900 |
| H | -4.36402100 | 1.63335000  | 2.63106800  |
| N | -5.75383400 | 2.44146500  | 0.59870300  |
| C | 0.28155400  | 3.89182400  | 0.77862500  |
| C | 1.41334000  | 4.43823500  | 1.67196700  |
| H | 1.15434200  | 4.34640000  | 2.73291200  |
| H | 2.34354600  | 3.89444300  | 1.49554600  |
| C | 3.52634800  | 1.05370400  | -0.98072300 |
| C | 4.80812000  | 1.31071500  | -0.47478900 |
| C | 3.11253600  | 1.66272300  | -2.18980700 |
| C | 5.67933100  | 2.17318800  | -1.13859700 |
| H | 5.12818000  | 0.82358100  | 0.44008500  |
| C | 4.00373100  | 2.52441500  | -2.83775500 |
| C | 5.27320300  | 2.78579800  | -2.32283900 |
| H | 6.66822900  | 2.36191300  | -0.73199100 |
| H | 3.69045400  | 2.99941600  | -3.76365000 |
| H | 5.94026600  | 3.46421400  | -2.84605300 |
| C | 3.29256700  | -0.73114000 | 1.31180600  |
| C | 3.50485200  | 0.02233100  | 2.48948600  |
| C | 3.74519800  | -2.05793000 | 1.25279000  |
| C | 4.15986600  | -0.58812400 | 3.56569500  |
| C | 4.39171100  | -2.64748000 | 2.33758800  |
| C | 4.59757500  | -1.90964800 | 3.50155700  |
| H | 4.32224800  | -0.01001900 | 4.47133200  |
| H | 4.72865300  | -3.67746700 | 2.27081300  |
| H | 5.09473600  | -2.35862900 | 4.35615500  |
| C | 1.76505300  | 1.38157800  | -2.80898300 |
| H | 1.77368700  | 0.43295900  | -3.35700000 |
| H | 0.97854300  | 1.30390500  | -2.04948800 |
| H | 1.48521200  | 2.17553000  | -3.50560900 |
| C | 3.07501700  | 1.46071200  | 2.59371200  |

|   |             |             |             |
|---|-------------|-------------|-------------|
| H | 3.74035100  | 2.10799500  | 2.01021500  |
| H | 2.06596100  | 1.61763400  | 2.20001600  |
| H | 3.10372600  | 1.80622600  | 3.63015300  |
| H | 3.58371900  | -2.64176400 | 0.35481600  |
| N | 0.01632000  | 2.50061000  | 1.19038400  |
| H | -0.24167400 | 2.48724200  | 2.17134400  |
| C | -0.96624500 | 4.77918800  | 0.96731100  |
| H | -1.30347400 | 4.74538500  | 2.00930100  |
| H | -0.73964600 | 5.82196300  | 0.72003800  |
| H | -1.78952400 | 4.44252600  | 0.33670100  |
| C | 0.75520400  | 3.92953900  | -0.67542600 |
| H | 1.65026100  | 3.31629400  | -0.79519500 |
| H | -0.01612800 | 3.56540300  | -1.35567700 |
| H | 1.00201500  | 4.95610900  | -0.96531200 |
| H | 1.58819300  | 5.49947800  | 1.46182900  |

**20**

|    |             |             |             |
|----|-------------|-------------|-------------|
| Ni | -0.38004100 | -0.71609300 | 0.33529400  |
| P  | 0.46969400  | 1.13913200  | -0.25288300 |
| P  | -2.37162400 | -0.01935000 | -0.04296600 |
| C  | 1.72371300  | -2.47944500 | 0.75820300  |
| C  | 2.38485800  | -2.61156200 | -0.45125900 |
| C  | 2.48424800  | -2.21566300 | 1.93437700  |
| C  | -0.81372800 | 1.88823200  | -1.37583900 |
| C  | -2.11773200 | 1.34880700  | -1.26954200 |
| C  | 2.11168900  | 1.38572600  | -1.16789800 |
| C  | 0.89369800  | 2.49388600  | 1.01765100  |
| C  | 3.84789100  | -2.07591000 | 1.88783400  |
| H  | 1.96055200  | -2.11091400 | 2.88118200  |
| O  | 2.37331800  | 2.75457500  | -1.55290300 |
| O  | 2.05526200  | 2.01896600  | 1.73011300  |
| C  | -3.13155500 | 1.80244700  | -2.12253300 |
| C  | -0.56816400 | 2.86869300  | -2.35171800 |
| C  | 1.24647500  | 3.81910900  | 0.33995700  |
| C  | 3.18251900  | 0.95398100  | -0.16048200 |
| C  | 2.15585100  | 0.56682800  | -2.44628600 |
| C  | -0.20409300 | 2.65383900  | 2.05063700  |
| C  | 4.54721600  | -2.18809300 | 0.65603300  |
| H  | -4.12124500 | 1.35998300  | -2.05342700 |
| C  | -2.87329900 | 2.78193300  | -3.08055900 |
| C  | -1.58743800 | 3.31111000  | -3.19561900 |
| H  | 0.43447200  | 3.26136700  | -2.46609200 |
| C  | 2.53655500  | 3.67611700  | -0.47615000 |
| H  | 0.42434500  | 4.16222000  | -0.29131900 |

|   |             |             |             |
|---|-------------|-------------|-------------|
| H | 1.42352500  | 4.57190900  | 1.11626400  |
| H | 4.15509700  | 0.90725600  | -0.66171700 |
| H | 2.94574600  | -0.02896800 | 0.24116300  |
| C | 3.27016900  | 1.97146000  | 0.98032400  |
| H | 3.13248000  | 0.68091100  | -2.92763400 |
| H | 1.37962600  | 0.89021500  | -3.14469700 |
| H | 1.99717500  | -0.48718500 | -2.20847600 |
| H | 0.08818200  | 3.41076100  | 2.78611300  |
| H | -0.37636000 | 1.70987400  | 2.56880500  |
| H | -1.14045300 | 2.96041300  | 1.57747500  |
| O | 3.56333600  | 3.24622800  | 0.40977600  |
| H | -3.66697800 | 3.11894800  | -3.74122300 |
| H | -1.37216300 | 4.06240000  | -3.95014200 |
| C | 3.00337000  | 4.97446000  | -1.10112600 |
| C | 4.36838700  | 1.66189700  | 1.97490200  |
| H | 3.92350000  | 4.79212200  | -1.66025100 |
| H | 3.19767800  | 5.71438200  | -0.32170700 |
| H | 2.24034100  | 5.35977600  | -1.78213000 |
| H | 4.39918500  | 2.44754000  | 2.73288200  |
| H | 5.33296300  | 1.61126500  | 1.46562100  |
| H | 4.16820800  | 0.70170100  | 2.45325700  |
| H | 1.82985100  | -2.76606100 | -1.36641200 |
| C | 3.78994000  | -2.46469400 | -0.52681000 |
| C | 6.51713000  | -2.06780000 | -0.51412200 |
| C | 5.86619500  | -2.33144800 | -1.74484300 |
| C | 4.50611200  | -2.53220100 | -1.74967300 |
| H | 7.59411700  | -1.90840300 | -0.49783600 |
| H | 6.44382200  | -2.36971900 | -2.66281500 |
| H | 3.96858700  | -2.72992100 | -2.67323500 |
| H | 4.42756900  | -1.87118500 | 2.78132300  |
| N | 5.89449500  | -1.99752200 | 0.64789900  |
| C | -0.39124700 | -3.86841300 | 0.46214300  |
| C | -1.78958200 | -3.81413300 | 1.08690200  |
| H | -1.73044800 | -3.76527000 | 2.18059100  |
| H | -2.33695600 | -2.94236700 | 0.72292100  |
| C | -3.78020600 | -0.96216300 | -0.77143900 |
| C | -4.92771700 | -1.22893300 | -0.00656700 |
| C | -3.62550000 | -1.60411500 | -2.02632600 |
| C | -5.91100700 | -2.10770000 | -0.45729300 |
| H | -5.04963700 | -0.73839500 | 0.95335500  |
| C | -4.62589400 | -2.47989600 | -2.46038800 |
| C | -5.76123100 | -2.73747100 | -1.69190400 |
| H | -6.79022700 | -2.29437100 | 0.15267600  |
| H | -4.50758800 | -2.97024400 | -3.42375600 |

|   |             |             |             |
|---|-------------|-------------|-------------|
| H | -6.51875200 | -3.42577500 | -2.05489200 |
| C | -3.17645300 | 0.87875500  | 1.36880200  |
| C | -2.90862300 | 0.50533600  | 2.70473800  |
| C | -4.01669500 | 1.97533400  | 1.12596000  |
| C | -3.49102600 | 1.24554800  | 3.74165500  |
| C | -4.58789900 | 2.70166600  | 2.16871500  |
| C | -4.32183100 | 2.33423000  | 3.48639800  |
| H | -3.27723900 | 0.96363400  | 4.76920100  |
| H | -5.23027100 | 3.54974000  | 1.95098300  |
| H | -4.75225200 | 2.89362600  | 4.31177200  |
| C | -2.43235700 | -1.35335500 | -2.91678800 |
| H | -2.57106700 | -0.45125800 | -3.52214500 |
| H | -1.51903600 | -1.19302000 | -2.33433900 |
| H | -2.27067300 | -2.19532200 | -3.59585300 |
| C | -2.00154000 | -0.64639000 | 3.05632800  |
| H | -2.44698100 | -1.60718600 | 2.78336400  |
| H | -1.05055600 | -0.56397700 | 2.50673700  |
| H | -1.78961800 | -0.65917500 | 4.12925900  |
| H | -4.21712500 | 2.27613500  | 0.10462300  |
| N | 0.30296000  | -2.58868100 | 0.89007000  |
| H | 0.09179100  | -2.48577800 | 1.88131600  |
| C | 0.37889400  | -5.08610700 | 0.99080500  |
| H | 0.45418300  | -5.05942600 | 2.08354200  |
| H | -0.13790200 | -6.00880300 | 0.71075800  |
| H | 1.39102400  | -5.12406800 | 0.58036900  |
| C | -0.53389800 | -3.92646700 | -1.06124500 |
| H | -0.89647600 | -2.96723800 | -1.43099400 |
| H | 0.40816500  | -4.17113700 | -1.55529000 |
| H | -1.25779500 | -4.70048400 | -1.33240700 |
| H | -2.34895900 | -4.71601900 | 0.82533200  |

**21**

|    |             |             |             |
|----|-------------|-------------|-------------|
| Ni | -0.00360600 | 0.54664200  | -0.49929600 |
| P  | 0.50836800  | -1.46490700 | 0.35820300  |
| P  | -2.26580900 | -0.08516300 | -0.07238600 |
| C  | 1.82552300  | 1.09926200  | -0.59649400 |
| C  | 2.37863100  | 1.82903100  | 0.44041600  |
| C  | 2.62134700  | 0.87782200  | -1.75964200 |
| C  | -0.92126200 | -2.12346700 | 1.32851800  |
| C  | -2.16322000 | -1.49128200 | 1.11666800  |
| C  | 2.05123200  | -1.94686800 | 1.34825400  |
| C  | 0.87075200  | -2.71655000 | -1.01990200 |
| C  | 3.90850400  | 1.35984800  | -1.86063200 |
| H  | 2.20889700  | 0.29937400  | -2.58127000 |



|   |             |             |             |
|---|-------------|-------------|-------------|
| O | 2.03566000  | -3.36414300 | 1.62620300  |
| O | 2.14733400  | -2.35327500 | -1.56515900 |
| C | -3.28997400 | -1.89536200 | 1.84614500  |
| C | -0.84133700 | -3.15381100 | 2.28356000  |
| C | 0.95133500  | -4.12844400 | -0.44040300 |
| C | 3.28378700  | -1.65899000 | 0.48835300  |
| C | 2.09447400  | -1.22752000 | 2.68515700  |
| C | -0.13107500 | -2.58582000 | -2.15084400 |
| C | 4.49200800  | 2.09454500  | -0.79455700 |
| H | -4.23666400 | -1.39087000 | 1.68389600  |
| C | -3.19784300 | -2.91992500 | 2.78338800  |
| C | -1.96864500 | -3.54439100 | 3.00265600  |
| H | 0.11066600  | -3.63192800 | 2.46833600  |
| C | 2.16228900  | -4.23960400 | 0.49509900  |
| H | 0.02786900  | -4.39139300 | 0.07958700  |
| H | 1.09788100  | -4.83560000 | -1.26354000 |
| H | 4.16939800  | -1.88889200 | 1.08973300  |
| H | 3.32345400  | -0.61613800 | 0.18654600  |
| C | 3.29328400  | -2.57817000 | -0.73412800 |
| H | 2.97185900  | -1.55989400 | 3.24804400  |
| H | 1.20088000  | -1.43276900 | 3.27976400  |
| H | 2.16920000  | -0.15071400 | 2.51471000  |
| H | 0.16401500  | -3.24143300 | -2.97597600 |
| H | -0.16464600 | -1.55393000 | -2.51031500 |
| H | -1.13301800 | -2.86560100 | -1.81869700 |
| O | 3.31693300  | -3.92550300 | -0.26402800 |
| H | -4.07578200 | -3.22183200 | 3.34630500  |
| H | -1.88312100 | -4.33528900 | 3.74185600  |
| C | 2.35854200  | -5.62768800 | 1.06654700  |
| C | 4.50332200  | -2.38816000 | -1.62070900 |
| H | 3.23822300  | -5.62854900 | 1.71315700  |
| H | 2.50866900  | -6.34350500 | 0.25565800  |
| H | 1.48266300  | -5.92257600 | 1.64969500  |
| H | 4.44557300  | -3.08092900 | -2.46278000 |
| H | 5.41281400  | -2.59020500 | -1.05085700 |
| H | 4.52974900  | -1.36191300 | -1.98965900 |
| H | 1.79557600  | 2.05562100  | 1.33107900  |
| C | 3.70410500  | 2.33591700  | 0.37545200  |
| C | 6.28657600  | 3.23733400  | 0.07000000  |
| C | 5.59092300  | 3.54323900  | 1.26637300  |
| C | 4.30108000  | 3.09080800  | 1.41569700  |
| H | 7.31053000  | 3.58668000  | -0.05905400 |
| H | 6.07923500  | 4.12622500  | 2.04092200  |
| H | 3.72735100  | 3.30547100  | 2.31390700  |

|   |             |             |             |
|---|-------------|-------------|-------------|
| H | 4.51352100  | 1.19568500  | -2.74751000 |
| N | 5.77353000  | 2.54486000  | -0.92817500 |
| C | -3.36263500 | 1.03311400  | 0.88397700  |
| C | -4.70666800 | 1.20894600  | 0.53311400  |
| C | -2.82697500 | 1.71438900  | 2.00184700  |
| C | -5.52780600 | 2.06729600  | 1.26350300  |
| H | -5.11094400 | 0.66960300  | -0.31679000 |
| C | -3.66952800 | 2.56889800  | 2.71946200  |
| C | -5.00415100 | 2.75279000  | 2.35765400  |
| H | -6.56633700 | 2.19830600  | 0.97585300  |
| H | -3.26453100 | 3.10530100  | 3.57284100  |
| H | -5.63064100 | 3.42998000  | 2.93026800  |
| C | -3.29644600 | -0.74533100 | -1.44489300 |
| C | -3.64592700 | 0.09047800  | -2.53345900 |
| C | -3.66337300 | -2.10008500 | -1.46198400 |
| C | -4.35221500 | -0.48178700 | -3.60002300 |
| C | -4.35827800 | -2.64515100 | -2.53975300 |
| C | -4.70262800 | -1.83037500 | -3.61588800 |
| H | -4.62451400 | 0.15381300  | -4.43793700 |
| H | -4.62593600 | -3.69729700 | -2.53417900 |
| H | -5.24191600 | -2.24030400 | -4.46466100 |
| C | -1.39056300 | 1.54602200  | 2.42562200  |
| H | -1.19274100 | 0.52776100  | 2.77855300  |
| H | -0.71047500 | 1.74444100  | 1.58881500  |
| H | -1.13973200 | 2.24094400  | 3.22988900  |
| C | -3.30493400 | 1.55607400  | -2.56766700 |
| H | -3.92470900 | 2.12046800  | -1.86140000 |
| H | -2.25336400 | 1.74469700  | -2.30259200 |
| H | -3.48731900 | 1.96712100  | -3.56398200 |
| H | -3.40094900 | -2.73982600 | -0.62797900 |
| N | -0.32619800 | 2.16001900  | -1.57934200 |
| H | 0.45398800  | 2.17159200  | -2.23303900 |
| C | -0.31969300 | 3.38912600  | -0.91352800 |
| C | 0.76308600  | 4.29340200  | -0.99835600 |
| C | -1.42935400 | 3.77850000  | -0.13466500 |
| C | 0.73764100  | 5.51130300  | -0.32423100 |
| H | 1.63222300  | 4.01659600  | -1.58868400 |
| C | -1.44338800 | 4.98993900  | 0.54830700  |
| H | -2.28723100 | 3.12222800  | -0.08754200 |
| C | -0.35871600 | 5.86797400  | 0.46557500  |
| H | 1.58899500  | 6.18216800  | -0.40673600 |
| H | -2.31602100 | 5.25286300  | 1.14134200  |
| H | -0.37162100 | 6.81508900  | 0.99643500  |

**TS22**

|    |             |             |             |
|----|-------------|-------------|-------------|
| Ni | -0.12045000 | 0.45622100  | -0.53489000 |
| P  | 0.97476600  | -1.30851300 | 0.17440700  |
| P  | -2.09786700 | -0.68722600 | 0.07752000  |
| C  | 1.18679300  | 1.89241300  | -0.74116000 |
| C  | 1.48638500  | 2.58018500  | 0.44388400  |
| C  | 2.16095300  | 1.91931800  | -1.80094000 |
| C  | -0.13813400 | -2.36443800 | 1.20512100  |
| C  | -1.51983300 | -2.08881200 | 1.12762300  |
| C  | 2.62985600  | -1.27688400 | 1.07653700  |
| C  | 1.62173000  | -2.40318100 | -1.22393200 |
| C  | 3.36198600  | 2.55810200  | -1.65465300 |
| H  | 1.94145600  | 1.39177600  | -2.72605400 |
| O  | 3.11824900  | -2.61206200 | 1.33070100  |
| O  | 2.66082300  | -1.64035700 | -1.86131100 |
| C  | -2.42375600 | -2.81065700 | 1.91949200  |
| C  | 0.30387200  | -3.35915700 | 2.09563900  |
| C  | 2.21690300  | -3.69977600 | -0.67585400 |
| C  | 3.61137600  | -0.57626900 | 0.13551400  |
| C  | 2.51489300  | -0.57552300 | 2.41858400  |
| C  | 0.54366500  | -2.63279100 | -2.26741700 |
| C  | 3.70778200  | 3.21096500  | -0.43349500 |
| H  | -3.48187700 | -2.57448600 | 1.86695400  |
| C  | -1.97287300 | -3.80228700 | 2.78653700  |
| C  | -0.60533000 | -4.06937400 | 2.87715800  |
| H  | 1.36486100  | -3.54969600 | 2.19017500  |
| C  | 3.45656500  | -3.38832700 | 0.17480700  |
| H  | 1.47534100  | -4.25568100 | -0.09809100 |
| H  | 2.53611300  | -4.32251300 | -1.51839700 |
| H  | 4.56360400  | -0.45253900 | 0.66140700  |
| H  | 3.24237000  | 0.40573400  | -0.15206400 |
| C  | 3.86112100  | -1.44536700 | -1.10126300 |
| H  | 3.48932800  | -0.58069300 | 2.91631500  |
| H  | 1.78923200  | -1.07424500 | 3.06630200  |
| H  | 2.20251500  | 0.46032900  | 2.25955400  |
| H  | 0.95600900  | -3.19870600 | -3.10872900 |
| H  | 0.16476300  | -1.67465500 | -2.63301600 |
| H  | -0.29386000 | -3.19157000 | -1.84058700 |
| O  | 4.37903900  | -2.69759700 | -0.65265400 |
| H  | -2.68145200 | -4.35250600 | 3.39825500  |
| H  | -0.24267200 | -4.82693900 | 3.56559200  |
| C  | 4.15721600  | -4.62559600 | 0.69492900  |
| C  | 4.87461600  | -0.85716900 | -2.05686900 |
| H  | 5.02932500  | -4.32439900 | 1.27862900  |

|   |             |             |             |
|---|-------------|-------------|-------------|
| H | 4.48267600  | -5.24725900 | -0.14193700 |
| H | 3.48099700  | -5.20253000 | 1.33074900  |
| H | 5.01741800  | -1.54100100 | -2.89620800 |
| H | 5.82721200  | -0.71255700 | -1.54308100 |
| H | 4.51628500  | 0.10540800  | -2.42313400 |
| H | 0.75959300  | 2.62844600  | 1.24928000  |
| C | 2.73721400  | 3.21650800  | 0.62348600  |
| C | 5.23845600  | 4.38037000  | 0.81704400  |
| C | 4.35894500  | 4.45082900  | 1.92244400  |
| C | 3.11345200  | 3.87265600  | 1.82543700  |
| H | 6.22747400  | 4.83157100  | 0.88075900  |
| H | 4.67281000  | 4.95712100  | 2.83038400  |
| H | 2.41043100  | 3.90908800  | 2.65408000  |
| H | 4.09923400  | 2.56759700  | -2.45182800 |
| N | 4.93231400  | 3.78517800  | -0.32474500 |
| C | -3.34768300 | 0.06407800  | 1.19868200  |
| C | -4.70613000 | 0.10663900  | 0.85851200  |
| C | -2.90729000 | 0.67210300  | 2.39966700  |
| C | -5.62813800 | 0.76813100  | 1.66876000  |
| H | -5.04561600 | -0.38304000 | -0.04777800 |
| C | -3.84957000 | 1.33185400  | 3.19483500  |
| C | -5.19688500 | 1.39097700  | 2.83765500  |
| H | -6.67553000 | 0.79533100  | 1.38418600  |
| H | -3.51562400 | 1.80678900  | 4.11360200  |
| H | -5.90311300 | 1.91715300  | 3.47264000  |
| C | -3.06676200 | -1.49110900 | -1.26165800 |
| C | -3.62411000 | -0.69078400 | -2.28871400 |
| C | -3.18460100 | -2.88687600 | -1.33111000 |
| C | -4.30402400 | -1.32972200 | -3.33200900 |
| C | -3.85332400 | -3.50105700 | -2.38907000 |
| C | -4.42051800 | -2.71799700 | -3.39145000 |
| H | -4.74104500 | -0.71948800 | -4.11763200 |
| H | -3.93059100 | -4.58347600 | -2.42400600 |
| H | -4.94725100 | -3.18242700 | -4.21972200 |
| C | -1.47109900 | 0.60541700  | 2.86147900  |
| H | -1.24517300 | -0.36895000 | 3.30823900  |
| H | -0.76377000 | 0.73873800  | 2.03409800  |
| H | -1.26739100 | 1.37656000  | 3.60851800  |
| C | -3.49128500 | 0.80961700  | -2.28977400 |
| H | -3.97985700 | 1.27075700  | -1.42600000 |
| H | -2.44004400 | 1.10468400  | -2.23990800 |
| H | -3.93211800 | 1.23942200  | -3.19231500 |
| H | -2.74963700 | -3.50191200 | -0.55247600 |
| N | -0.46613900 | 2.10794400  | -1.47679900 |

|   |             |            |             |
|---|-------------|------------|-------------|
| H | -0.18641200 | 2.19386000 | -2.44536500 |
| C | -1.28004200 | 3.15977700 | -1.06638400 |
| C | -1.54793400 | 4.24739600 | -1.91901500 |
| C | -1.86776600 | 3.14708200 | 0.20902000  |
| C | -2.40368900 | 5.26638500 | -1.51285600 |
| H | -1.08809900 | 4.27791500 | -2.90400000 |
| C | -2.72066400 | 4.17115700 | 0.60917000  |
| H | -1.67526300 | 2.30703600 | 0.85972600  |
| C | -2.99891700 | 5.23750800 | -0.24749600 |
| H | -2.60597700 | 6.09217700 | -2.18921600 |
| H | -3.17980800 | 4.12112600 | 1.59243900  |
| H | -3.66641200 | 6.03492700 | 0.06321500  |

### 23

|    |             |             |             |
|----|-------------|-------------|-------------|
| Ni | -0.24565600 | 0.16135900  | -0.67876700 |
| P  | 1.57300000  | -0.65316800 | 0.03575400  |
| P  | -1.43172100 | -1.18683000 | 0.50474700  |
| C  | -0.18510200 | 2.68132300  | -1.24661600 |
| C  | -0.62166400 | 3.34291300  | -0.11456900 |
| C  | 1.08714600  | 2.99654200  | -1.80364400 |
| C  | 1.10806100  | -1.44721400 | 1.65841200  |
| C  | -0.27353600 | -1.67356800 | 1.86290000  |
| C  | 3.23088400  | 0.19663200  | 0.39170100  |
| C  | 2.40440900  | -2.02005800 | -0.99009300 |
| C  | 1.91075600  | 3.91568300  | -1.20824000 |
| H  | 1.40083300  | 2.48479600  | -2.70981400 |
| O  | 4.22786200  | -0.69158900 | 0.95123500  |
| O  | 3.00391000  | -1.35452100 | -2.12373900 |
| C  | -0.72553800 | -2.19461100 | 3.08197200  |
| C  | 1.99980400  | -1.75602200 | 2.69929100  |
| C  | 3.50470100  | -2.73020400 | -0.20110800 |
| C  | 3.74175900  | 0.67454800  | -0.97120500 |
| C  | 3.05730900  | 1.33968400  | 1.37659300  |
| C  | 1.38230500  | -2.98685000 | -1.55452600 |
| C  | 1.51567600  | 4.57483100  | -0.01011600 |
| H  | -1.79034000 | -2.34786500 | 3.23109600  |
| C  | 0.17278100  | -2.49162400 | 4.10588400  |
| C  | 1.53649200  | -2.26903100 | 3.91115900  |
| H  | 3.05699600  | -1.56769800 | 2.56235200  |
| C  | 4.65160200  | -1.75956500 | 0.10548800  |
| H  | 3.10321900  | -3.15815400 | 0.71993000  |
| H  | 3.90883000  | -3.54423600 | -0.81308900 |
| H  | 4.63183600  | 1.29445000  | -0.81773900 |
| H  | 2.97907300  | 1.27039600  | -1.47132500 |

|   |             |             |             |
|---|-------------|-------------|-------------|
| C | 4.13171000  | -0.52826100 | -1.83711100 |
| H | 4.01379200  | 1.84904400  | 1.53117400  |
| H | 2.69583000  | 0.97367500  | 2.34077300  |
| H | 2.33511700  | 2.05847800  | 0.98309500  |
| H | 1.87629700  | -3.69007700 | -2.23319400 |
| H | 0.60506500  | -2.44742700 | -2.10048400 |
| H | 0.90094900  | -3.54867100 | -0.75094800 |
| O | 5.13522700  | -1.26072600 | -1.13782000 |
| H | -0.19004400 | -2.88592600 | 5.05069900  |
| H | 2.24334500  | -2.48714300 | 4.70668500  |
| C | 5.82346500  | -2.41332500 | 0.80772600  |
| C | 4.72021800  | -0.13907200 | -3.17711000 |
| H | 6.60018500  | -1.66575000 | 0.98157900  |
| H | 6.22843700  | -3.21533500 | 0.18686900  |
| H | 5.50238200  | -2.82694700 | 1.76690100  |
| H | 4.98992300  | -1.04309800 | -3.72702100 |
| H | 5.61329900  | 0.47202100  | -3.02933100 |
| H | 3.98570600  | 0.42647300  | -3.75563600 |
| H | -1.59780800 | 3.14367500  | 0.30443800  |
| C | 0.22295400  | 4.28161500  | 0.52994300  |
| C | 1.99444300  | 6.04809900  | 1.68334300  |
| C | 0.74027700  | 5.83270500  | 2.30162900  |
| C | -0.14499100 | 4.95179300  | 1.72273700  |
| H | 2.70391100  | 6.74262000  | 2.13055100  |
| H | 0.49204600  | 6.35968900  | 3.21732500  |
| H | -1.11851400 | 4.75743800  | 2.16494700  |
| H | 2.88447300  | 4.15580600  | -1.62059100 |
| N | 2.37973300  | 5.45065300  | 0.56942700  |
| C | -2.96717500 | -0.74662900 | 1.42684100  |
| C | -4.18523200 | -1.38170400 | 1.14130500  |
| C | -2.96286200 | 0.38377100  | 2.28427900  |
| C | -5.38613500 | -0.91999600 | 1.67810200  |
| H | -4.19095500 | -2.24824100 | 0.48918100  |
| C | -4.17873400 | 0.82940900  | 2.81316400  |
| C | -5.38538300 | 0.19310100  | 2.51723500  |
| H | -6.31537600 | -1.43011500 | 1.44159100  |
| H | -4.17592900 | 1.69647000  | 3.46907300  |
| H | -6.31358200 | 0.56473900  | 2.94115200  |
| C | -1.87011300 | -2.80902400 | -0.26796400 |
| C | -2.44897000 | -2.83164600 | -1.55861000 |
| C | -1.57616900 | -4.02257100 | 0.36995100  |
| C | -2.71333200 | -4.07054500 | -2.15418000 |
| C | -1.84213800 | -5.24675000 | -0.24194300 |
| C | -2.41366100 | -5.27101600 | -1.51205900 |

|   |             |             |             |
|---|-------------|-------------|-------------|
| H | -3.15699600 | -4.08833800 | -3.14616000 |
| H | -1.60235000 | -6.17236200 | 0.27295100  |
| H | -2.62384100 | -6.21649800 | -2.00331900 |
| C | -1.68990800 | 1.11665200  | 2.63001400  |
| H | -1.09828400 | 0.56395100  | 3.36685900  |
| H | -1.04660300 | 1.24034600  | 1.75034300  |
| H | -1.90800200 | 2.10534300  | 3.04316400  |
| C | -2.77797700 | -1.56580200 | -2.30638900 |
| H | -3.51504700 | -0.95504600 | -1.77638200 |
| H | -1.88341900 | -0.94207500 | -2.41364700 |
| H | -3.17487600 | -1.79022600 | -3.29977500 |
| H | -1.12496800 | -4.01316600 | 1.35487100  |
| N | -0.96213100 | 1.66996300  | -1.90766600 |
| H | -0.53980500 | 1.46393200  | -2.80800800 |
| C | -2.38709100 | 1.82208500  | -2.06569300 |
| C | -2.91457300 | 2.03501500  | -3.34040400 |
| C | -3.24431200 | 1.68641700  | -0.97258200 |
| C | -4.29741600 | 2.09943300  | -3.52078400 |
| H | -2.24592800 | 2.14212700  | -4.19106300 |
| C | -4.62250800 | 1.77310100  | -1.15197100 |
| H | -2.83842300 | 1.44604100  | -0.00254500 |
| C | -5.15508900 | 1.97367900  | -2.42768200 |
| H | -4.70055700 | 2.25133200  | -4.51736900 |
| H | -5.27271400 | 1.64778200  | -0.29213600 |
| H | -6.23007000 | 2.02242300  | -2.57020800 |

**24**

|    |             |             |             |
|----|-------------|-------------|-------------|
| Ni | -0.09243100 | 1.07173100  | -0.32208200 |
| Cl | -0.65349200 | 3.19626600  | -0.84046400 |
| P  | 0.45952700  | -0.95240200 | 0.39437300  |
| P  | -2.28885300 | 0.38527100  | -0.02454400 |
| C  | 1.73229600  | 1.59182600  | -0.53645300 |
| C  | 2.38640800  | 1.34527700  | -1.77488600 |
| C  | -0.93711500 | -1.54051200 | 1.46520800  |
| C  | -2.17435700 | -0.88195100 | 1.29807000  |
| C  | 2.03443700  | -1.41147000 | 1.35045700  |
| C  | 0.77292900  | -2.24589500 | -0.95853600 |
| C  | 3.69887600  | 1.71669800  | -1.97131000 |
| C  | 3.78755700  | 2.62304400  | 0.30348200  |
| O  | 2.00453900  | -2.81980400 | 1.67012900  |
| O  | 2.03662900  | -1.90684400 | -1.54454100 |
| C  | -3.25664700 | -1.18609200 | 2.13214000  |
| C  | -0.82710300 | -2.51999300 | 2.46732600  |
| C  | 0.85458600  | -3.63858100 | -0.33306100 |

|   |             |             |             |
|---|-------------|-------------|-------------|
| C | 3.24512400  | -1.16799400 | 0.44824100  |
| C | 2.12796800  | -0.65900900 | 2.66611300  |
| C | -0.24585100 | -2.15462200 | -2.07701900 |
| H | 4.18580500  | 1.52625500  | -2.92545400 |
| C | 4.44440400  | 2.34587700  | -0.93912800 |
| H | -4.19248500 | -0.65198000 | 2.00217700  |
| C | -3.12890200 | -2.15214400 | 3.12772200  |
| C | -1.91384100 | -2.81919500 | 3.28854100  |
| H | 0.11752000  | -3.02464200 | 2.61615700  |
| C | 2.09253700  | -3.73335400 | 0.56667700  |
| H | -0.05511700 | -3.86882000 | 0.22576700  |
| H | 0.96335700  | -4.37558900 | -1.13555800 |
| H | 4.14302800  | -1.39307200 | 1.03285200  |
| H | 3.29317100  | -0.13572700 | 0.11522600  |
| C | 3.20580800  | -2.12305200 | -0.74417100 |
| H | 3.01729800  | -0.99394800 | 3.20813000  |
| H | 1.25084300  | -0.83579300 | 3.29264700  |
| H | 2.21625300  | 0.41092800  | 2.46728700  |
| H | 0.06005200  | -2.81935100 | -2.89061000 |
| H | -0.30279400 | -1.13303300 | -2.45960900 |
| H | -1.23726600 | -2.45103600 | -1.73092700 |
| O | 3.22683000  | -3.45688500 | -0.23661200 |
| H | -3.96938100 | -2.37859400 | 3.77662300  |
| C | 2.29245000  | -5.10369500 | 1.17825900  |
| C | 4.38724000  | -1.97208300 | -1.67515700 |
| H | 3.19115000  | -5.09211500 | 1.79802500  |
| H | 2.41144100  | -5.84773400 | 0.38786000  |
| H | 1.43181100  | -5.36977600 | 1.79685300  |
| H | 4.30058300  | -2.69544100 | -2.48857100 |
| H | 5.31435900  | -2.15488200 | -1.12765600 |
| H | 4.40031300  | -0.95984400 | -2.08191700 |
| H | 1.85288100  | 0.84192000  | -2.57497600 |
| C | 4.52681300  | 3.25571000  | 1.33864200  |
| H | 4.02509000  | 3.47087700  | 2.27880900  |
| C | 6.49896500  | 3.31332100  | -0.06800700 |
| H | 7.54259700  | 3.58415200  | -0.19769500 |
| C | 5.84948800  | 3.59161100  | 1.16001900  |
| H | 6.40142100  | 4.07447800  | 1.96132100  |
| C | 2.42715500  | 2.24228700  | 0.46266900  |
| H | 1.93729500  | 2.48816200  | 1.40230800  |
| H | -1.80340500 | -3.56901600 | 4.06613800  |
| C | -3.50390700 | 1.58334000  | 0.62974300  |
| C | -4.75683000 | 1.72346200  | 0.02068200  |
| C | -3.16242300 | 2.37752400  | 1.74937900  |



|   |             |             |             |
|---|-------------|-------------|-------------|
| C | -5.68383000 | 2.64640900  | 0.50292900  |
| H | -5.00833300 | 1.10591100  | -0.83446300 |
| C | -4.11302100 | 3.28915500  | 2.21840900  |
| C | -5.35832400 | 3.43149900  | 1.60611300  |
| H | -6.64983400 | 2.74750100  | 0.01812200  |
| H | -3.86385000 | 3.90553100  | 3.07756000  |
| H | -6.06985900 | 4.15528400  | 1.99219700  |
| C | -3.16092800 | -0.50240900 | -1.38125700 |
| C | -3.74907500 | -1.75448600 | -1.14761400 |
| C | -3.18454700 | 0.04955100  | -2.68319500 |
| C | -4.35074300 | -2.47102700 | -2.18027600 |
| C | -3.79846600 | -0.68770600 | -3.70344400 |
| C | -4.37203900 | -1.93539000 | -3.46623200 |
| H | -4.79727600 | -3.43958500 | -1.97742800 |
| H | -3.81827900 | -0.26844700 | -4.70535200 |
| H | -4.83356600 | -2.48363200 | -4.28205000 |
| C | -1.82410600 | 2.27064700  | 2.43379900  |
| H | -1.63792400 | 1.25971300  | 2.81130800  |
| H | -1.02287400 | 2.52317600  | 1.73087100  |
| H | -1.76693400 | 2.96087800  | 3.27888200  |
| H | -3.73022600 | -2.18225300 | -0.15289800 |
| C | -2.57101100 | 1.38637700  | -2.99514000 |
| H | -2.97504000 | 2.18278200  | -2.36358200 |
| H | -1.49389900 | 1.39172200  | -2.80522400 |
| H | -2.73893100 | 1.65738600  | -4.04002600 |
| C | 5.80870800  | 2.70607500  | -1.09262700 |
| H | 6.30027000  | 2.49371700  | -2.03879700 |

**25**

|    |             |             |             |
|----|-------------|-------------|-------------|
| Ni | -0.34623100 | 0.09209600  | 0.63312400  |
| P  | -2.26983700 | -0.23099100 | -0.42837500 |
| P  | 0.10715100  | -2.16750500 | 0.12617400  |
| C  | -0.53971500 | 1.98611800  | 0.66271800  |
| C  | -0.08389400 | 2.75198900  | -0.39460600 |
| C  | -1.02979800 | 2.65522200  | 1.82052800  |
| C  | -2.17127100 | -1.75819200 | -1.46283600 |
| C  | -1.06679200 | -2.60221500 | -1.22682400 |
| C  | -3.29933000 | 1.00125300  | -1.43283600 |
| C  | -3.62659800 | -0.48270200 | 0.87075900  |
| C  | -1.06577300 | 4.03035100  | 1.88893900  |
| H  | -1.38089200 | 2.06382000  | 2.65920200  |
| O  | -4.56277700 | 0.40314000  | -1.79541300 |
| O  | -3.85561800 | 0.80935800  | 1.45492000  |
| C  | -0.86738200 | -3.73511900 | -2.02659900 |

|   |             |             |             |
|---|-------------|-------------|-------------|
| C | -3.06668300 | -2.08356500 | -2.49759500 |
| C | -4.91026800 | -0.97412400 | 0.20158600  |
| C | -3.59403900 | 2.20759900  | -0.54027200 |
| C | -2.60337400 | 1.38931200  | -2.72573100 |
| C | -3.15150800 | -1.38504500 | 1.99375600  |
| C | -0.60147200 | 4.83235400  | 0.81027000  |
| H | -0.00321900 | -4.36655800 | -1.84748200 |
| C | -1.76027200 | -4.04568400 | -3.04847500 |
| C | -2.86030500 | -3.21759500 | -3.28033800 |
| H | -3.90948300 | -1.43414200 | -2.69254800 |
| C | -5.46877300 | 0.11686000  | -0.71976700 |
| H | -4.73197900 | -1.89879400 | -0.35224300 |
| H | -5.65525200 | -1.17395300 | 0.97885700  |
| H | -4.14148200 | 2.94083800  | -1.14152400 |
| H | -2.67800300 | 2.66348200  | -0.17493600 |
| C | -4.49199300 | 1.78835700  | 0.62532300  |
| H | -3.24896100 | 2.06621000  | -3.29324600 |
| H | -2.38756300 | 0.51389100  | -3.34255800 |
| H | -1.66731300 | 1.90275600  | -2.49519600 |
| H | -3.92331300 | -1.43727600 | 2.76806000  |
| H | -2.23179600 | -0.99225700 | 2.43522700  |
| H | -2.95392300 | -2.39412700 | 1.62495700  |
| O | -5.70243800 | 1.26934800  | 0.07380000  |
| H | -1.59563600 | -4.92407600 | -3.66509000 |
| H | -3.55698800 | -3.44883800 | -4.08060600 |
| C | -6.78241500 | -0.25708800 | -1.37278100 |
| C | -4.85809700 | 2.93744600  | 1.53723900  |
| H | -7.11826800 | 0.56876900  | -2.00294700 |
| H | -7.53490100 | -0.45184200 | -0.60572300 |
| H | -6.65571900 | -1.15098700 | -1.98845900 |
| H | -5.50415500 | 2.57276800  | 2.33845200  |
| H | -5.38686600 | 3.70601300  | 0.96926800  |
| H | -3.94797500 | 3.36329900  | 1.96371600  |
| H | 0.31269700  | 2.27778500  | -1.28959100 |
| C | -0.09072100 | 4.17533500  | -0.35462900 |
| C | -0.14942500 | 6.99156800  | -0.21516000 |
| C | 0.36212400  | 6.34208800  | -1.36496200 |
| C | 0.39002700  | 4.96683100  | -1.43138600 |
| H | -0.16725700 | 8.07658100  | -0.17389400 |
| H | 0.73286100  | 6.93514300  | -2.19608500 |
| H | 0.78205700  | 4.46305400  | -2.31167100 |
| H | -1.44390800 | 4.52674300  | 2.78036800  |
| C | 2.03255100  | 1.10185300  | 1.99936800  |
| H | 1.74282700  | 2.10868200  | 1.66049700  |

|   |             |             |             |
|---|-------------|-------------|-------------|
| H | 2.37569300  | 1.23351900  | 3.03947500  |
| C | 3.20016300  | 0.55563500  | 1.14734900  |
| H | 3.81773700  | -0.09691400 | 1.77169600  |
| H | 2.76463700  | -0.07604500 | 0.37233600  |
| C | 4.08195300  | 1.61279900  | 0.45876700  |
| O | 0.94306300  | 0.22844900  | 2.00558700  |
| C | 1.70827500  | -2.54879400 | -0.69722500 |
| C | 2.38651200  | -3.74012000 | -0.39570200 |
| C | 2.21979800  | -1.67813500 | -1.68486300 |
| C | 3.57029500  | -4.07632500 | -1.04750100 |
| H | 1.97575200  | -4.41166000 | 0.35003400  |
| C | 3.41319900  | -2.03838400 | -2.32520100 |
| C | 4.08491200  | -3.21786100 | -2.01852300 |
| H | 4.08120000  | -5.00175400 | -0.79989800 |
| H | 3.82573200  | -1.36439100 | -3.07008400 |
| H | 5.00956400  | -3.46091500 | -2.53283100 |
| C | -0.14541000 | -3.50291600 | 1.36704900  |
| C | 0.66085400  | -3.54898400 | 2.53032200  |
| C | -1.19579100 | -4.42033000 | 1.21118300  |
| C | 0.37489200  | -4.52963200 | 3.48886300  |
| C | -1.46567800 | -5.37866600 | 2.18649800  |
| C | -0.67450100 | -5.43326500 | 3.33156200  |
| H | 0.99178000  | -4.57292800 | 4.38210300  |
| H | -2.28729400 | -6.07467100 | 2.04766400  |
| H | -0.87228900 | -6.17357100 | 4.10111400  |
| C | 1.56484000  | -0.38131400 | -2.09404800 |
| H | 1.41415500  | -0.35815900 | -3.17893200 |
| H | 0.59189500  | -0.23017800 | -1.62061900 |
| H | 2.19449300  | 0.47477300  | -1.81510800 |
| C | 1.80701800  | -2.59864000 | 2.74991100  |
| H | 2.65420600  | -2.85066000 | 2.10147600  |
| H | 1.51985200  | -1.55952100 | 2.52821100  |
| H | 2.15458000  | -2.65206800 | 3.78512400  |
| H | -1.81281300 | -4.38602300 | 0.32142400  |
| C | 5.26741500  | 0.97955700  | -0.28743300 |
| C | 5.50689400  | -0.39821100 | -0.31032400 |
| C | 6.15542100  | 1.80559800  | -0.99563700 |
| C | 6.59290000  | -0.93150800 | -1.00888800 |
| H | 4.83897700  | -1.07571500 | 0.20534500  |
| C | 7.23701600  | 1.28006800  | -1.69814800 |
| H | 6.00613500  | 2.88168900  | -0.99909100 |
| C | 7.46383900  | -0.09781400 | -1.70569300 |
| H | 6.74796800  | -2.00638700 | -1.00735100 |
| H | 7.90482600  | 1.94628700  | -2.23705500 |

|   |             |             |             |
|---|-------------|-------------|-------------|
| H | 8.30861800  | -0.51233400 | -2.24805700 |
| C | 4.60979300  | 2.64203800  | 1.49620100  |
| H | 3.74481600  | 3.14287300  | 1.94605200  |
| H | 5.16603100  | 3.42225100  | 0.96211900  |
| C | 5.49710600  | 2.05350700  | 2.59551200  |
| H | 5.87226700  | 2.84125600  | 3.25655400  |
| H | 4.94603600  | 1.33831200  | 3.21365700  |
| H | 6.35913500  | 1.53227800  | 2.16785900  |
| N | 3.23754300  | 2.26726600  | -0.57324600 |
| H | 2.42800500  | 2.69233100  | -0.12552400 |
| H | 3.75307200  | 3.02980500  | -1.00680100 |
| C | -0.61939100 | 6.25058800  | 0.84663400  |
| H | -1.00900200 | 6.74450000  | 1.73328000  |

### TS26

|    |             |             |             |
|----|-------------|-------------|-------------|
| Ni | -0.34029200 | 0.23783600  | 0.25406300  |
| P  | -2.15247200 | -0.82892800 | -0.28403800 |
| P  | 0.81334900  | -1.76104600 | -0.02961900 |
| C  | -0.85774600 | 2.08841100  | 0.52857500  |
| C  | -1.12733400 | 2.91061900  | -0.57752400 |
| C  | -1.47898800 | 2.41579000  | 1.78624700  |
| C  | -1.65116600 | -2.32014400 | -1.25383600 |
| C  | -0.30274700 | -2.72875400 | -1.13211800 |
| C  | -3.59627100 | -0.05946000 | -1.22241400 |
| C  | -3.25225000 | -1.42177200 | 1.14328000  |
| C  | -2.35401200 | 3.45936800  | 1.88616200  |
| H  | -1.24489600 | 1.80823000  | 2.65416300  |
| O  | -4.64851900 | -1.02255900 | -1.44834600 |
| O  | -3.82591500 | -0.23860100 | 1.72040200  |
| C  | 0.16844300  | -3.81462800 | -1.88193800 |
| C  | -2.49169400 | -3.01626700 | -2.13935200 |
| C  | -4.37407100 | -2.31762500 | 0.61637500  |
| C  | -4.14132300 | 1.05641400  | -0.32712000 |
| C  | -3.16017800 | 0.45622000  | -2.58231500 |
| C  | -2.43493800 | -2.07813500 | 2.23824200  |
| C  | -2.68878100 | 4.27454600  | 0.76001200  |
| H  | 1.20786400  | -4.11281400 | -1.79045800 |
| C  | -0.67942300 | -4.49873300 | -2.75043000 |
| C  | -2.00856900 | -4.09353000 | -2.88071300 |
| H  | -3.51639300 | -2.68972000 | -2.26081700 |
| C  | -5.31987100 | -1.50448100 | -0.27818500 |
| H  | -3.96698900 | -3.17565700 | 0.07690500  |
| H  | -4.95374300 | -2.68844600 | 1.46857200  |
| H  | -4.90701900 | 1.60450000  | -0.88542100 |

|   |             |             |             |
|---|-------------|-------------|-------------|
| H | -3.35062700 | 1.75022800  | -0.05146700 |
| C | -4.78965300 | 0.45699100  | 0.92113200  |
| H | -4.02519000 | 0.87452100  | -3.10585100 |
| H | -2.73297800 | -0.34253300 | -3.19398700 |
| H | -2.41445200 | 1.24329900  | -2.44477900 |
| H | -3.08425100 | -2.30275400 | 3.09032800  |
| H | -1.63327700 | -1.41316100 | 2.56845700  |
| H | -1.98421300 | -3.00646000 | 1.88233500  |
| O | -5.82554000 | -0.43072200 | 0.49739700  |
| H | -0.30195100 | -5.33657400 | -3.32898200 |
| H | -2.67164000 | -4.61168600 | -3.56720900 |
| C | -6.50853400 | -2.29869500 | -0.77758600 |
| C | -5.42725700 | 1.48767600  | 1.82487900  |
| H | -7.13548800 | -1.65367200 | -1.39640700 |
| H | -7.09396300 | -2.66232500 | 0.06958200  |
| H | -6.16987800 | -3.14978900 | -1.37369900 |
| H | -5.88444500 | 0.98341900  | 2.67899900  |
| H | -6.19562800 | 2.03562600  | 1.27543100  |
| H | -4.66578500 | 2.18594100  | 2.17268200  |
| H | -0.67483700 | 2.69932100  | -1.54245800 |
| C | -2.04651600 | 3.98517400  | -0.49073000 |
| C | -3.94495200 | 6.08396700  | -0.27465100 |
| C | -3.31898600 | 5.80180200  | -1.50977500 |
| C | -2.39549800 | 4.78299900  | -1.61579200 |
| H | -4.67055900 | 6.88823400  | -0.20331600 |
| H | -3.56981300 | 6.39415500  | -2.38580400 |
| H | -1.92048200 | 4.57123700  | -2.57099900 |
| H | -2.82049500 | 3.68156000  | 2.84373100  |
| C | 1.69131300  | 2.33795100  | -0.01379300 |
| H | 1.47422000  | 2.12034600  | -1.06499200 |
| H | 1.59261200  | 3.42298500  | 0.12196500  |
| C | 3.07668800  | 1.82019300  | 0.34263900  |
| H | 3.25833900  | 1.99109100  | 1.40762500  |
| H | 3.06981200  | 0.74117600  | 0.18583800  |
| C | 4.23828600  | 2.42811800  | -0.48068700 |
| O | 0.75797500  | 1.70522300  | 0.85418000  |
| C | 2.42987900  | -1.97617700 | -0.87719700 |
| C | 3.42219200  | -2.82238600 | -0.35904100 |
| C | 2.66040100  | -1.28068700 | -2.08519600 |
| C | 4.63035300  | -2.99980900 | -1.03058800 |
| H | 3.23915400  | -3.35347200 | 0.56872500  |
| C | 3.88573900  | -1.46392000 | -2.73549900 |
| C | 4.86145900  | -2.31782300 | -2.22537900 |
| H | 5.38486700  | -3.66446600 | -0.62065400 |

|   |             |             |             |
|---|-------------|-------------|-------------|
| H | 4.07659900  | -0.91310500 | -3.65129200 |
| H | 5.80487000  | -2.43577200 | -2.74933900 |
| C | 0.96986700  | -2.79891000 | 1.47688600  |
| C | 1.61327400  | -2.25561800 | 2.61361600  |
| C | 0.41178800  | -4.08317600 | 1.54151300  |
| C | 1.65659600  | -3.02476600 | 3.78219100  |
| C | 0.46505700  | -4.83059900 | 2.71694100  |
| C | 1.08605000  | -4.29570900 | 3.84389700  |
| H | 2.14702900  | -2.61221600 | 4.65959100  |
| H | 0.02208600  | -5.82137400 | 2.74938300  |
| H | 1.12953600  | -4.86421300 | 4.76806200  |
| C | 1.61610100  | -0.38968000 | -2.70664900 |
| H | 0.91572700  | -0.97414900 | -3.31541400 |
| H | 1.01744100  | 0.12291700  | -1.94544000 |
| H | 2.08682000  | 0.36505800  | -3.33892200 |
| C | 2.27040200  | -0.89945100 | 2.58148500  |
| H | 3.15181800  | -0.90462500 | 1.92983700  |
| H | 1.60008200  | -0.12402900 | 2.19768400  |
| H | 2.60098500  | -0.60400200 | 3.58029700  |
| H | -0.07647900 | -4.49927000 | 0.66762300  |
| C | 5.54728900  | 1.74967400  | -0.05038100 |
| C | 5.62971000  | 0.34985700  | -0.11499800 |
| C | 6.68347300  | 2.45407600  | 0.36434800  |
| C | 6.79493200  | -0.32163300 | 0.24363100  |
| H | 4.78078800  | -0.21637700 | -0.47169500 |
| C | 7.85491900  | 1.78319100  | 0.72707900  |
| H | 6.67399200  | 3.53613200  | 0.40957800  |
| C | 7.91515100  | 0.39272300  | 0.67376900  |
| H | 6.82390900  | -1.40506100 | 0.17985600  |
| H | 8.71988700  | 2.35532100  | 1.05022300  |
| H | 8.82476600  | -0.12847800 | 0.95761500  |
| C | 4.27247600  | 3.96954000  | -0.32154100 |
| H | 3.41850000  | 4.37425800  | -0.87826600 |
| H | 5.16122000  | 4.35056200  | -0.83909000 |
| C | 4.21598000  | 4.51455100  | 1.11114900  |
| H | 4.37376000  | 5.59767300  | 1.11580200  |
| H | 3.24201200  | 4.32410200  | 1.57048800  |
| H | 4.97550800  | 4.06147600  | 1.75358900  |
| N | 4.03338300  | 2.05408600  | -1.90528100 |
| H | 3.29079200  | 2.62993400  | -2.29780200 |
| H | 4.87587000  | 2.28662400  | -2.42709900 |
| C | -3.62649700 | 5.32631400  | 0.83666000  |
| H | -4.10144500 | 5.52957000  | 1.79401700  |

27

|    |             |             |             |
|----|-------------|-------------|-------------|
| Ni | -0.14356700 | 0.03006900  | 0.21560200  |
| P  | -1.91682600 | -1.01016700 | -0.24970300 |
| P  | 1.11881700  | -1.66827900 | -0.00871900 |
| C  | -0.91653600 | 2.72654400  | 0.45279900  |
| C  | -1.49625200 | 3.41965400  | -0.58553600 |
| C  | -1.52682300 | 2.66547200  | 1.73036000  |
| C  | -1.29517400 | -2.47753200 | -1.21896200 |
| C  | 0.08147700  | -2.77948700 | -1.07835000 |
| C  | -3.43194300 | -0.40091100 | -1.21712600 |
| C  | -3.00771100 | -1.74213300 | 1.12702200  |
| C  | -2.71805600 | 3.30963900  | 1.94356700  |
| H  | -1.03020900 | 2.10206100  | 2.51190200  |
| O  | -4.40804600 | -1.43608900 | -1.48345800 |
| O  | -3.71292000 | -0.63170700 | 1.72303400  |
| C  | 0.63852700  | -3.84478800 | -1.79759100 |
| C  | -2.06451100 | -3.24928500 | -2.10593600 |
| C  | -4.03599000 | -2.72714900 | 0.57188700  |
| C  | -4.08510300 | 0.65543500  | -0.31734100 |
| C  | -3.02556800 | 0.16826200  | -2.56505000 |
| C  | -2.15587000 | -2.34576700 | 2.22594300  |
| C  | -3.37163400 | 4.01763900  | 0.89540600  |
| H  | 1.69600800  | -4.06333000 | -1.68789200 |
| C  | -0.14269100 | -4.60804200 | -2.66404700 |
| C  | -1.49409200 | -4.30142500 | -2.82293700 |
| H  | -3.10912700 | -3.00479700 | -2.24825700 |
| C  | -5.03808600 | -1.99762700 | -0.33294600 |
| H  | -3.54349400 | -3.53874700 | 0.03255800  |
| H  | -4.59677400 | -3.15932900 | 1.40831700  |
| H  | -4.87609500 | 1.16569900  | -0.87741000 |
| H  | -3.34687800 | 1.39133200  | -0.00271100 |
| C  | -4.71052300 | -0.01776400 | 0.90857600  |
| H  | -3.90958400 | 0.53597400  | -3.09622100 |
| H  | -2.53608100 | -0.59086900 | -3.18079700 |
| H  | -2.32966100 | 0.99782200  | -2.41251700 |
| H  | -2.79182600 | -2.65089600 | 3.06369200  |
| H  | -1.41730400 | -1.62154100 | 2.57862100  |
| H  | -1.61687500 | -3.21963900 | 1.85374700  |
| O  | -5.65704400 | -0.98147300 | 0.44609600  |
| H  | 0.30415000  | -5.42757800 | -3.21963500 |
| H  | -2.10763300 | -4.87754600 | -3.50996200 |
| C  | -6.14176500 | -2.89472600 | -0.85378900 |
| C  | -5.46864700 | 0.93307000  | 1.80997500  |
| H  | -6.81893700 | -2.30602700 | -1.47614300 |

|   |             |             |             |
|---|-------------|-------------|-------------|
| H | -6.70046000 | -3.32065500 | -0.01754900 |
| H | -5.71637800 | -3.70424500 | -1.45228200 |
| H | -5.93979600 | 0.36175200  | 2.61270400  |
| H | -6.23793400 | 1.45811700  | 1.23971900  |
| H | -4.77928300 | 1.66024700  | 2.23813700  |
| H | -1.02904000 | 3.45088800  | -1.56366400 |
| C | -2.74698500 | 4.06736000  | -0.39232100 |
| C | -5.25290800 | 5.29279400  | 0.03337300  |
| C | -4.63764900 | 5.34087700  | -1.23918400 |
| C | -3.41249100 | 4.74522600  | -1.44609300 |
| H | -6.21863700 | 5.76529400  | 0.18320500  |
| H | -5.13710800 | 5.85060000  | -2.05762900 |
| H | -2.94196800 | 4.77948300  | -2.42502200 |
| H | -3.18388000 | 3.27605100  | 2.92395000  |
| C | 1.30187400  | 2.64976900  | -0.50500500 |
| H | 1.13637000  | 2.32671000  | -1.53791400 |
| H | 1.18258300  | 3.73524900  | -0.44791100 |
| C | 2.64570200  | 2.18134300  | 0.02116000  |
| H | 2.69967300  | 2.42392900  | 1.08636300  |
| H | 2.67289100  | 1.09464400  | -0.06588700 |
| C | 3.87281600  | 2.78695800  | -0.70427400 |
| O | 0.28998700  | 2.06013300  | 0.34384600  |
| C | 2.74849000  | -1.83930700 | -0.86802900 |
| C | 3.82080100  | -2.54450300 | -0.29882000 |
| C | 2.92664800  | -1.20263100 | -2.11904000 |
| C | 5.05171000  | -2.63089000 | -0.94731900 |
| H | 3.68399100  | -3.03914900 | 0.65664200  |
| C | 4.17453700  | -1.28827300 | -2.74610500 |
| C | 5.23137400  | -1.99526000 | -2.17595000 |
| H | 5.86422900  | -3.19196400 | -0.49424900 |
| H | 4.31577200  | -0.78030900 | -3.69588100 |
| H | 6.19009200  | -2.04249300 | -2.68358700 |
| C | 1.39022200  | -2.64995200 | 1.52736400  |
| C | 1.98885700  | -2.02094900 | 2.64541400  |
| C | 0.95596900  | -3.97806700 | 1.63855500  |
| C | 2.12317800  | -2.75050200 | 3.83194700  |
| C | 1.09486400  | -4.68669800 | 2.83135700  |
| C | 1.67978200  | -4.06896900 | 3.93464600  |
| H | 2.58261400  | -2.26967100 | 4.69169500  |
| H | 0.74814100  | -5.71400400 | 2.89468600  |
| H | 1.79212400  | -4.60745500 | 4.87110000  |
| C | 1.80325700  | -0.46540200 | -2.80046400 |
| H | 1.14399200  | -1.16043900 | -3.33399600 |
| H | 1.17332600  | 0.05460400  | -2.06852300 |



|   |             |             |             |
|---|-------------|-------------|-------------|
| H | 2.19709700  | 0.26362100  | -3.51131900 |
| C | 2.49129400  | -0.60021500 | 2.58358800  |
| H | 3.32721900  | -0.49833400 | 1.88264200  |
| H | 1.70531600  | 0.07736700  | 2.23055000  |
| H | 2.83633200  | -0.26529400 | 3.56552600  |
| H | 0.49955900  | -4.46193000 | 0.78240000  |
| C | 5.14221200  | 2.21854700  | -0.05213700 |
| C | 5.29945200  | 0.82515200  | 0.01197200  |
| C | 6.17324300  | 3.02065700  | 0.45160300  |
| C | 6.43166700  | 0.25623600  | 0.58970700  |
| H | 4.54131700  | 0.18062000  | -0.41153800 |
| C | 7.31111000  | 2.45202100  | 1.03000600  |
| H | 6.10805100  | 4.10046100  | 0.40051800  |
| C | 7.44197000  | 1.06765400  | 1.10901700  |
| H | 6.51994500  | -0.82438100 | 0.62259600  |
| H | 8.09323600  | 3.09850300  | 1.41754900  |
| H | 8.32403800  | 0.62500700  | 1.56238000  |
| C | 3.81817900  | 4.33720600  | -0.66810700 |
| H | 3.03065000  | 4.65419800  | -1.36394900 |
| H | 4.74934900  | 4.72373700  | -1.09809700 |
| C | 3.55284000  | 4.98881000  | 0.69564200  |
| H | 3.65343100  | 6.07653000  | 0.62724500  |
| H | 2.54067200  | 4.77697200  | 1.05227600  |
| H | 4.24692900  | 4.63444300  | 1.46155100  |
| N | 3.86729900  | 2.29464000  | -2.10380500 |
| H | 3.18114700  | 2.81298500  | -2.64900600 |
| H | 4.77270200  | 2.48527700  | -2.52616300 |
| C | -4.62812800 | 4.64613700  | 1.07761900  |
| H | -5.09638500 | 4.60054300  | 2.05711500  |

**28**

|    |             |             |             |
|----|-------------|-------------|-------------|
| Ni | 0.01969500  | -0.29377100 | 0.30306400  |
| P  | 0.96592100  | 1.70873800  | -0.24170500 |
| P  | -2.07852800 | 0.94840600  | -0.10375500 |
| C  | 1.69481200  | -1.16232500 | 0.36532900  |
| C  | 2.20420300  | -1.74189700 | -0.78226700 |
| C  | 2.45748400  | -1.27007500 | 1.56391600  |
| C  | -0.22418200 | 2.80914200  | -1.13231000 |
| C  | -1.58657800 | 2.46182700  | -1.04197700 |
| C  | 2.64866400  | 2.03580100  | -1.05576100 |
| C  | 1.44638100  | 2.62949800  | 1.34665700  |
| C  | 3.65753100  | -1.94464600 | 1.59558300  |
| H  | 2.09110700  | -0.80191300 | 2.47211400  |
| O  | 2.92194700  | 3.45431900  | -1.08966300 |

|   |             |             |             |
|---|-------------|-------------|-------------|
| O | 2.59075500  | 1.94861600  | 1.88535000  |
| C | -2.54934900 | 3.22100200  | -1.72345400 |
| C | 0.13958200  | 3.91595300  | -1.92338400 |
| C | 1.82652300  | 4.07377400  | 1.01995800  |
| C | 3.73783800  | 1.38445600  | -0.20096900 |
| C | 2.66597800  | 1.53997000  | -2.49122700 |
| C | 0.35386100  | 2.51979900  | 2.39307500  |
| C | 4.18435100  | -2.55783700 | 0.42673800  |
| H | -3.59359300 | 2.93464000  | -1.65736400 |
| C | -2.17703100 | 4.31774000  | -2.49337500 |
| C | -0.82705300 | 4.65834300  | -2.59651600 |
| H | 1.18296600  | 4.18398800  | -2.01278800 |
| C | 3.10870500  | 4.09899000  | 0.17747000  |
| H | 1.01070700  | 4.58558200  | 0.50564000  |
| H | 2.03208900  | 4.60204700  | 1.95688800  |
| H | 4.69360100  | 1.53351900  | -0.71414500 |
| H | 3.56639900  | 0.31933600  | -0.07981800 |
| C | 3.81923300  | 2.07971900  | -1.15965600 |
| H | 3.63348500  | 1.77379500  | -2.94564500 |
| H | 1.87837400  | 2.00809300  | -3.08660300 |
| H | 2.52187100  | 0.45688800  | -2.49921300 |
| H | 0.70013100  | 2.96777600  | 3.32976300  |
| H | 0.10216500  | 1.47068500  | 2.57062700  |
| H | -0.55094100 | 3.03767200  | 2.06852300  |
| O | 4.12373300  | 3.45491100  | 0.92914700  |
| H | -2.93206900 | 4.89497000  | -3.01841700 |
| H | -0.52215600 | 5.50307300  | -3.20717500 |
| C | 3.59478200  | 5.49779300  | -0.13748600 |
| C | 4.90442500  | 1.52789300  | 2.05642600  |
| H | 4.51078000  | 5.43530600  | -0.72828300 |
| H | 3.80223300  | 6.03562800  | 0.79007900  |
| H | 2.83567100  | 6.04011300  | -0.70654500 |
| H | 4.90766000  | 2.07993000  | 2.99867700  |
| H | 5.87582600  | 1.64156700  | 1.57024900  |
| H | 4.71744300  | 0.47104100  | 2.24866100  |
| H | 1.64516500  | -1.69884100 | -1.71383400 |
| C | 3.43684700  | -2.45047900 | -0.79041200 |
| C | 5.88537800  | -3.85157100 | -0.73480400 |
| C | 5.14331400  | -3.75266400 | -1.93740600 |
| C | 3.94886500  | -3.06840200 | -1.96285400 |
| H | 6.82645500  | -4.39332800 | -0.72677900 |
| H | 5.52166300  | -4.22150400 | -2.84121200 |
| H | 3.37422300  | -2.99205200 | -2.88266400 |
| H | 4.21875000  | -2.02565500 | 2.52420600  |

|   |             |             |             |
|---|-------------|-------------|-------------|
| C | -0.80095600 | -3.20266800 | 1.02667900  |
| C | -2.04417200 | -3.76572400 | 1.79051400  |
| H | -2.94164500 | -3.26049300 | 1.43648500  |
| C | -3.29302500 | 0.29235300  | -1.31753600 |
| C | -4.67397600 | 0.38926200  | -1.10273000 |
| C | -2.80130100 | -0.22640000 | -2.53617200 |
| C | -5.57902700 | -0.02656000 | -2.07806300 |
| H | -5.04218500 | 0.80982500  | -0.17344800 |
| C | -3.72865400 | -0.61616200 | -3.50856600 |
| C | -5.10238300 | -0.52540100 | -3.28933100 |
| H | -6.64633000 | 0.04956700  | -1.89426100 |
| H | -3.35870100 | -1.01431000 | -4.44912900 |
| H | -5.79600500 | -0.84496500 | -4.06136000 |
| C | -3.08602300 | 1.62976000  | 1.28175700  |
| C | -3.73742000 | 0.74580300  | 2.17462900  |
| C | -3.14532800 | 3.01328800  | 1.51109900  |
| C | -4.42721600 | 1.29285200  | 3.26418700  |
| C | -3.82933000 | 3.53268000  | 2.60892200  |
| C | -4.47414300 | 2.66725000  | 3.49005400  |
| H | -4.93087000 | 0.61564300  | 3.94847600  |
| H | -3.85584100 | 4.60609500  | 2.77002700  |
| H | -5.01007700 | 3.05811600  | 4.34999000  |
| C | -1.32567900 | -0.35206300 | -2.81703100 |
| H | -0.86489700 | 0.62866100  | -2.97899600 |
| H | -0.80498400 | -0.82835700 | -1.97755500 |
| H | -1.15143900 | -0.96739700 | -3.70121900 |
| C | -3.71238700 | -0.74183500 | 1.96668900  |
| H | -4.41428300 | -1.03941700 | 1.17824500  |
| H | -2.70865400 | -1.08237500 | 1.66773700  |
| H | -3.99411500 | -1.28381600 | 2.87298800  |
| H | -2.65171600 | 3.69526400  | 0.82923100  |
| N | -0.75875500 | -1.74085100 | 1.27465700  |
| H | -0.29242600 | -1.63202400 | 2.17802700  |
| C | 0.46514300  | -3.92949100 | 1.56019300  |
| H | 0.64323700  | -3.56351200 | 2.57895300  |
| H | 1.33260400  | -3.60173100 | 0.99089400  |
| H | -2.17602200 | -4.82941100 | 1.56652900  |
| C | -1.01345900 | -3.45839500 | -0.47410700 |
| C | -2.25428700 | -3.18990600 | -1.06933800 |
| C | -0.00491800 | -3.97866200 | -1.29889700 |
| C | -2.49439800 | -3.47123800 | -2.41373100 |
| H | -3.05038300 | -2.75148600 | -0.48053100 |
| C | -0.22859400 | -4.23223800 | -2.65264100 |
| H | 0.97431700  | -4.18917700 | -0.89189600 |

|   |             |             |             |
|---|-------------|-------------|-------------|
| C | -1.48121200 | -3.99290400 | -3.21688500 |
| H | -3.47368600 | -3.26614400 | -2.83195700 |
| H | 0.57794000  | -4.63557800 | -3.25907100 |
| H | -1.66595800 | -4.21343600 | -4.26455100 |
| C | 5.41341800  | -3.26677300 | 0.41924400  |
| H | 5.97710300  | -3.34334100 | 1.34575100  |
| C | -2.00630300 | -3.56501900 | 3.29848300  |
| C | 0.41909700  | -5.46223200 | 1.58660500  |
| H | 0.14398900  | -5.87516200 | 0.61177200  |
| H | 1.40187100  | -5.86528300 | 1.85329900  |
| H | -0.30057000 | -5.84143800 | 2.31815900  |
| O | -3.32783300 | -3.79772800 | 3.79373200  |
| H | -3.30132200 | -3.70191400 | 4.75370800  |
| H | -1.68813900 | -2.53767700 | 3.52413700  |
| H | -1.28887600 | -4.25193700 | 3.77177500  |

## TS29

|    |             |             |             |
|----|-------------|-------------|-------------|
| Ni | -0.02850200 | -0.18019600 | 0.30535900  |
| P  | 0.46369900  | 1.92055100  | -0.18432800 |
| P  | -2.31123500 | 0.45884000  | -0.10517600 |
| C  | 1.69691900  | -0.97308500 | 0.54603600  |
| C  | 2.29911500  | -1.40161200 | -0.64684300 |
| C  | 2.56164800  | -0.74065000 | 1.67365300  |
| C  | -0.94223200 | 2.71940600  | -1.08196600 |
| C  | -2.18949800 | 2.06698700  | -1.00081600 |
| C  | 2.02184300  | 2.50672800  | -1.07872700 |
| C  | 0.80116200  | 3.00471600  | 1.33402300  |
| C  | 3.90447500  | -0.99859000 | 1.61175400  |
| H  | 2.13359800  | -0.35652500 | 2.59569800  |
| O  | 2.04508300  | 3.94682400  | -1.19165400 |
| O  | 2.05836500  | 2.56384900  | 1.87259700  |
| C  | -3.30164600 | 2.59382400  | -1.67388500 |
| C  | -0.84000200 | 3.88138000  | -1.86960700 |
| C  | 0.91818100  | 4.47421600  | 0.92860100  |
| C  | 3.21788400  | 2.07955500  | -0.22623700 |
| C  | 2.08831300  | 1.94151700  | -2.48674600 |
| C  | -0.23793300 | 2.76182700  | 2.41195700  |
| C  | 4.52166100  | -1.47524700 | 0.41626200  |
| H  | -4.25344500 | 2.07667000  | -1.61250400 |
| C  | -3.18852700 | 3.75235200  | -2.43598500 |
| C  | -1.95019000 | 4.38853800  | -2.54054400 |
| H  | 0.11992000  | 4.36922200  | -1.96822200 |
| C  | 2.15281200  | 4.67479400  | 0.03748100  |
| H  | 0.01079600  | 4.81409800  | 0.42524100  |

|   |             |             |             |
|---|-------------|-------------|-------------|
| H | 1.05876300  | 5.07666900  | 1.83247500  |
| H | 4.13225900  | 2.32876900  | -0.77451900 |
| H | 3.20076900  | 1.00804000  | -0.04300800 |
| C | 3.22390600  | 2.85771400  | 1.09166400  |
| H | 2.98358500  | 2.32025500  | -2.98915100 |
| H | 1.21119800  | 2.22673900  | -3.07337300 |
| H | 2.14540100  | 0.85097200  | -2.43309100 |
| H | 0.01787500  | 3.33566300  | 3.30838300  |
| H | -0.27329300 | 1.69911800  | 2.66593700  |
| H | -1.23054500 | 3.06314800  | 2.06904800  |
| O | 3.28324600  | 4.25020800  | 0.77974900  |
| H | -4.05577200 | 4.14754200  | -2.95637500 |
| H | -1.84494000 | 5.28091600  | -3.15053200 |
| C | 2.38480700  | 6.11899000  | -0.35406600 |
| C | 4.41495100  | 2.55745000  | 1.97328700  |
| H | 3.28150900  | 6.18251500  | -0.97373000 |
| H | 2.52359800  | 6.72858800  | 0.54138700  |
| H | 1.52973600  | 6.49832600  | -0.91918600 |
| H | 4.35255600  | 3.16454300  | 2.87901700  |
| H | 5.33697200  | 2.80051500  | 1.44075100  |
| H | 4.41792500  | 1.50033500  | 2.23643100  |
| H | 1.68996700  | -1.58557700 | -1.52473000 |
| C | 3.68661400  | -1.66512200 | -0.73554100 |
| C | 6.46680900  | -2.20504200 | -0.84965500 |
| C | 5.64711500  | -2.40034400 | -1.98606600 |
| C | 4.29515700  | -2.13783900 | -1.93256100 |
| H | 7.53066800  | -2.41404100 | -0.90556100 |
| H | 6.09029300  | -2.76268500 | -2.90987300 |
| H | 3.66641000  | -2.29589600 | -2.80521500 |
| H | 4.52853000  | -0.83752800 | 2.48851200  |
| C | 0.28753900  | -3.37094500 | 0.94094700  |
| C | -0.90170000 | -4.07022800 | 1.66533200  |
| H | -1.84023600 | -3.69385600 | 1.26067500  |
| C | -3.44293200 | -0.41881100 | -1.26008800 |
| C | -4.75673200 | -0.75327300 | -0.90495600 |
| C | -2.96140500 | -0.73500900 | -2.55204500 |
| C | -5.59722100 | -1.40763200 | -1.80444300 |
| H | -5.12931900 | -0.48524300 | 0.07780300  |
| C | -3.82863100 | -1.37742200 | -3.44297600 |
| C | -5.13123700 | -1.71940800 | -3.08033100 |
| H | -6.61063600 | -1.66299500 | -1.51019700 |
| H | -3.46749700 | -1.61571700 | -4.44007200 |
| H | -5.77667900 | -2.22505300 | -3.79212700 |
| C | -3.35200500 | 0.86753300  | 1.35659900  |

|   |             |             |             |
|---|-------------|-------------|-------------|
| C | -3.64466000 | -0.15112400 | 2.29316700  |
| C | -3.78360400 | 2.17875600  | 1.60522100  |
| C | -4.36881300 | 0.18420200  | 3.44269500  |
| C | -4.49521400 | 2.49307000  | 2.76215700  |
| C | -4.79030400 | 1.49107000  | 3.68451100  |
| H | -4.59793800 | -0.59942800 | 4.15973400  |
| H | -4.81651200 | 3.51532200  | 2.93746200  |
| H | -5.34393300 | 1.72395200  | 4.58926600  |
| C | -1.56781900 | -0.36972400 | -2.99984200 |
| H | -1.50626900 | 0.69058900  | -3.26822100 |
| H | -0.83201300 | -0.54741600 | -2.20740900 |
| H | -1.27003700 | -0.96244800 | -3.86691100 |
| C | -3.20018700 | -1.56747400 | 2.06088800  |
| H | -3.78049900 | -2.03847800 | 1.25888700  |
| H | -2.15056000 | -1.59659400 | 1.75154400  |
| H | -3.31269300 | -2.19058900 | 2.95012200  |
| H | -3.56194600 | 2.96256300  | 0.89077400  |
| N | 0.18771300  | -1.90917100 | 1.17980400  |
| H | 0.36283600  | -1.73899600 | 2.16457400  |
| C | 1.62327900  | -3.90897700 | 1.52886900  |
| H | 1.74096200  | -3.46895500 | 2.52607000  |
| H | 2.45297800  | -3.50744600 | 0.94679000  |
| H | -0.87726600 | -5.14118000 | 1.44050900  |
| C | 0.14336600  | -3.65906400 | -0.55878100 |
| C | -1.05484600 | -3.34145900 | -1.21196900 |
| C | 1.16333500  | -4.24890000 | -1.31736800 |
| C | -1.24342200 | -3.64162300 | -2.56081900 |
| H | -1.85084300 | -2.84708800 | -0.66736600 |
| C | 0.98830200  | -4.52939000 | -2.67227200 |
| H | 2.12250400  | -4.46529600 | -0.86710900 |
| C | -0.22219400 | -4.23748600 | -3.29986000 |
| H | -2.19132200 | -3.40198900 | -3.02894900 |
| H | 1.80285300  | -4.97872100 | -3.23301100 |
| H | -0.36786800 | -4.46999500 | -4.35087000 |
| C | 5.90454600  | -1.75047700 | 0.32717900  |
| H | 6.52330500  | -1.59804200 | 1.20877600  |
| C | -0.94524400 | -3.88891000 | 3.17707300  |
| C | 1.76000400  | -5.43280600 | 1.64804600  |
| H | 1.53758100  | -5.94226900 | 0.70695200  |
| H | 2.78427000  | -5.69399800 | 1.93318300  |
| H | 1.09374600  | -5.85045600 | 2.40855700  |
| O | -2.19696300 | -4.40771600 | 3.62794600  |
| H | -2.20603300 | -4.36027900 | 4.59187600  |
| H | -0.85946800 | -2.82297800 | 3.43595400  |

|           |             |             |             |
|-----------|-------------|-------------|-------------|
| H         | -0.10978800 | -4.41551200 | 3.65923600  |
| <b>30</b> |             |             |             |
| Ni        | -0.31943400 | -0.17261700 | 0.26124700  |
| P         | 0.49655900  | 1.75721300  | -0.19274500 |
| P         | -2.24506600 | 0.31190100  | -0.47915600 |
| C         | 2.16802600  | -1.56829200 | 0.78831200  |
| C         | 2.28831500  | -1.81308000 | -0.56280600 |
| C         | 3.33471000  | -1.38563500 | 1.57391100  |
| C         | -0.78316400 | 2.61491000  | -1.23672700 |
| C         | -2.01558600 | 1.94014700  | -1.37037800 |
| C         | 2.14738800  | 2.39488700  | -0.88594600 |
| C         | 0.68154900  | 2.79622000  | 1.38801400  |
| C         | 4.58428900  | -1.41997600 | 0.99645100  |
| H         | 3.22896500  | -1.19837900 | 2.63811100  |
| O         | 2.24631400  | 3.83996400  | -0.90926600 |
| O         | 1.85865900  | 2.27566200  | 2.05132200  |
| C         | -3.02089700 | 2.47503300  | -2.18580600 |
| C         | -0.59236800 | 3.81742300  | -1.94114000 |
| C         | 0.89486400  | 4.27774200  | 1.08810100  |
| C         | 3.22796300  | 1.86856900  | 0.06201100  |
| C         | 2.36185800  | 1.91973000  | -2.31312900 |
| C         | -0.47889100 | 2.55235900  | 2.33382200  |
| C         | 4.73562400  | -1.64830000 | -0.39483500 |
| H         | -3.96224500 | 1.94425800  | -2.28775500 |
| C         | -2.81993800 | 3.66947300  | -2.87371000 |
| C         | -1.59998900 | 4.33731100  | -2.75226600 |
| H         | 0.35854500  | 4.32917900  | -1.86772400 |
| C         | 2.23021300  | 4.48308500  | 0.36354800  |
| H         | 0.06767100  | 4.66974400  | 0.49211100  |
| H         | 0.93542300  | 4.83312100  | 2.03205800  |
| H         | 4.21222400  | 2.10128300  | -0.35868000 |
| H         | 3.14480300  | 0.79003000  | 0.17794600  |
| C         | 3.10964400  | 2.56619400  | 1.42170500  |
| H         | 3.32536300  | 2.28378100  | -2.68414200 |
| H         | 1.57214500  | 2.28598100  | -2.97397600 |
| H         | 2.36442400  | 0.82663400  | -2.34055500 |
| H         | -0.28358700 | 3.03352400  | 3.29804300  |
| H         | -0.62551700 | 1.47878000  | 2.48400800  |
| H         | -1.40337900 | 2.95607600  | 1.91577900  |
| O         | 3.25541000  | 3.96757700  | 1.20645600  |
| H         | -3.60508500 | 4.07119200  | -3.50780400 |
| H         | -1.42848200 | 5.26262700  | -3.29513000 |
| C         | 2.55858700  | 5.93857200  | 0.10351800  |

|   |             |             |             |
|---|-------------|-------------|-------------|
| C | 4.18457900  | 2.16334700  | 2.40899600  |
| H | 3.52253900  | 6.00311500  | -0.40537500 |
| H | 2.61349100  | 6.48249900  | 1.04896000  |
| H | 1.78880300  | 6.38954500  | -0.52760300 |
| H | 4.04650200  | 2.72266600  | 3.33670100  |
| H | 5.17019900  | 2.38940900  | 1.99612400  |
| H | 4.11830900  | 1.09418900  | 2.61372500  |
| H | 1.39714000  | -1.95597000 | -1.16017600 |
| C | 3.55806600  | -1.85897500 | -1.18412800 |
| C | 6.10411800  | -1.87779200 | -2.38970200 |
| C | 4.93936400  | -2.08801600 | -3.17019000 |
| C | 3.69653300  | -2.08082100 | -2.58108400 |
| H | 7.07852100  | -1.88588000 | -2.86847200 |
| H | 5.03417600  | -2.25590800 | -4.23870700 |
| H | 2.79942900  | -2.24364300 | -3.17192800 |
| H | 5.47062900  | -1.25980100 | 1.60371300  |
| C | 0.26175500  | -2.79053300 | 1.87856300  |
| C | -1.12682600 | -2.42832000 | 2.43591100  |
| H | -1.62700600 | -1.84349000 | 1.66076300  |
| C | -3.08373900 | -0.60669300 | -1.84964500 |
| C | -4.47284400 | -0.79122200 | -1.89795000 |
| C | -2.28074400 | -1.14711300 | -2.88241900 |
| C | -5.07038200 | -1.53400600 | -2.91504300 |
| H | -5.09437600 | -0.34319100 | -1.13032700 |
| C | -2.89772600 | -1.89548600 | -3.89202900 |
| C | -4.27714600 | -2.09995200 | -3.91178800 |
| H | -6.14831900 | -1.66639700 | -2.92784600 |
| H | -2.27969000 | -2.31753100 | -4.68070300 |
| H | -4.72770200 | -2.68817700 | -4.70571200 |
| C | -3.60930700 | 0.73338100  | 0.70452500  |
| C | -4.32344000 | -0.25898200 | 1.42155600  |
| C | -3.81619400 | 2.08331700  | 1.04474700  |
| C | -5.18961300 | 0.14132100  | 2.45037300  |
| C | -4.67999100 | 2.45862700  | 2.06980600  |
| C | -5.36958200 | 1.48093300  | 2.78477000  |
| H | -5.72664900 | -0.62681900 | 3.00079500  |
| H | -4.81071500 | 3.51036800  | 2.30689000  |
| H | -6.04050200 | 1.75522100  | 3.59296600  |
| C | -0.79621700 | -0.89951400 | -2.94111000 |
| H | -0.58193600 | 0.11844300  | -3.28745600 |
| H | -0.34713000 | -0.98028900 | -1.94241800 |
| H | -0.30206300 | -1.60520400 | -3.61420200 |
| C | -4.24138200 | -1.73951200 | 1.12547200  |
| H | -5.15208200 | -2.08246700 | 0.62266800  |



|   |             |             |             |
|---|-------------|-------------|-------------|
| H | -3.40864300 | -1.99115200 | 0.47240500  |
| H | -4.13557700 | -2.30398000 | 2.05531100  |
| H | -3.29186300 | 2.85393600  | 0.49295300  |
| N | 0.86080300  | -1.46878000 | 1.38770900  |
| H | 0.95387000  | -0.86319500 | 2.20272800  |
| C | 1.15644800  | -3.38849300 | 2.98602400  |
| H | 1.30914700  | -2.61450300 | 3.74817400  |
| H | 2.15166900  | -3.59583100 | 2.58341700  |
| H | -1.70872200 | -3.33925600 | 2.59989500  |
| C | 0.13988500  | -3.69381500 | 0.64724500  |
| C | -0.83782800 | -3.42536500 | -0.32250800 |
| C | 1.05434900  | -4.72114700 | 0.38536400  |
| C | -0.90103000 | -4.15480600 | -1.50876100 |
| H | -1.51734300 | -2.59577200 | -0.18227500 |
| C | 0.99464000  | -5.45748700 | -0.79900900 |
| H | 1.84172000  | -4.94582600 | 1.09397800  |
| C | 0.01720100  | -5.17669400 | -1.75243700 |
| H | -1.66363500 | -3.90903900 | -2.24088200 |
| H | 1.72130000  | -6.24479700 | -0.97613900 |
| H | -0.02768200 | -5.74679700 | -2.67578500 |
| C | 6.00319500  | -1.66480500 | -1.03407000 |
| H | 6.89380300  | -1.50348800 | -0.43269000 |
| C | -1.15579800 | -1.57636600 | 3.70784000  |
| C | 0.59549300  | -4.64552900 | 3.65899500  |
| H | 0.38928400  | -5.43294800 | 2.92967800  |
| H | 1.31066700  | -5.03915900 | 4.38789100  |
| H | -0.33686900 | -4.43646300 | 4.19075600  |
| O | -2.47178500 | -1.13486300 | 4.00097600  |
| H | -2.77041600 | -0.56860900 | 3.27426300  |
| H | -0.47147100 | -0.71733400 | 3.61680200  |
| H | -0.83291300 | -2.14811300 | 4.58279900  |
